# Supplementary material for: Liver transcriptomics highlights interleukin-32 as novel NAFLD-related cytokine and candidate biomarker
Source: HighWire-hosted journal article supplement (doi:10.1136/gutjnl-2019-319226), 2020-01-30
Supplement: gutjnl-2019-319226supp002_data_supplement.xlsx [file gutjnl-2019-319226supp002_data_supplement.xlsx]

## Sheet: A-PNPLA3 I148M carriers
A - PNPLA3 I148M carriers vs non carriers differential expression
ENSEMBL ID	Gene symbol	Mean count	log2FoldChange	log2FoldChange Standard Error	pvalue	padj	description
ENSG00000213002	AC120194.1	72.4294	-2.31005	0.441176	1.63997e-07	0.00267906
ENSG00000139910	NOVA1	14.4919	0.914452	0.187201	1.03506e-06	0.00639206	neuro-oncological ventral antigen 1
ENSG00000148541	FAM13C	14.1073	1.38171	0.284302	1.17386e-06	0.00639206	family with sequence similarity 13, member C
ENSG00000160180	TFF3	171.002	1.76653	0.372326	2.08948e-06	0.00853345	trefoil factor 3 (intestinal)
ENSG00000143321	HDGF	2304.71	-0.246158	0.0526195	2.89579e-06	0.00946112	hepatoma-derived growth factor
ENSG00000150337	FCGR1A	9.96086	1.28854	0.278459	3.70308e-06	0.0100822	Fc fragment of IgG, high affinity Ia, receptor (CD64)
ENSG00000139668	WDFY2	81.9721	0.550173	0.121117	5.55917e-06	0.0129735	WD repeat and FYVE domain containing 2
ENSG00000160271	RALGDS	121.691	0.586062	0.130422	7.00374e-06	0.0143016	ral guanine nucleotide dissociation stimulator
ENSG00000176749	CDK5R1	14.6083	0.816052	0.183537	8.73795e-06	0.0157967	cyclin-dependent kinase 5, regulatory subunit 1 (p35)
ENSG00000197217	ENTPD4	212.417	0.363197	0.082089	9.66987e-06	0.0157967	ectonucleoside triphosphate diphosphohydrolase 4
ENSG00000114770	ABCC5	169.76	0.492593	0.112282	1.14869e-05	0.0167617	ATP-binding cassette, sub-family C (CFTR/MRP), member 5
ENSG00000119906	FAM178A	211.554	0.422061	0.0981209	1.69693e-05	0.0167617	family with sequence similarity 178, member A
ENSG00000124126	PREX1	203.149	0.403328	0.093543	1.62017e-05	0.0167617	phosphatidylinositol-3,4,5-trisphosphate-dependent Rac exchange factor 1
ENSG00000153902	LGI4	89.7015	0.541003	0.12627	1.8315e-05	0.0167617	leucine-rich repeat LGI family, member 4
ENSG00000172724	CCL19	38.1248	0.96649	0.222719	1.42805e-05	0.0167617	chemokine (C-C motif) ligand 19
ENSG00000179091	CYC1	1226.58	-0.254588	0.0596142	1.94951e-05	0.0167617	cytochrome c-1
ENSG00000187764	SEMA4D	96.2901	0.626532	0.14483	1.51858e-05	0.0167617	sema domain, immunoglobulin domain (Ig), transmembrane domain (TM) and short cytoplasmic domain, (semaphorin) 4D
ENSG00000188488	SERPINA5	6399.32	-0.315066	0.0726008	1.42672e-05	0.0167617	serpin peptidase inhibitor, clade A (alpha-1 antiproteinase, antitrypsin), member 5
ENSG00000123358	NR4A1	265.646	1.44921	0.343287	2.42601e-05	0.0184063	nuclear receptor subfamily 4, group A, member 1
ENSG00000134186	PRPF38B	485.445	0.365695	0.0870719	2.67008e-05	0.0184063	pre-mRNA processing factor 38B
ENSG00000144161	ZC3H8	81.5736	0.518365	0.123488	2.69636e-05	0.0184063	zinc finger CCCH-type containing 8
ENSG00000154553	PDLIM3	25.6363	0.963766	0.230137	2.81682e-05	0.0184063	PDZ and LIM domain 3
ENSG00000179921	GPBAR1	17.5092	0.85224	0.2035	2.81542e-05	0.0184063	G protein-coupled bile acid receptor 1
ENSG00000213759	UGT2B11	22.2776	0.996339	0.236644	2.55056e-05	0.0184063	UDP glucuronosyltransferase 2 family, polypeptide B11
ENSG00000108405	P2RX1	9.3169	1.05674	0.253114	2.98024e-05	0.0187251	purinergic receptor P2X, ligand-gated ion channel, 1
ENSG00000079819	EPB41L2	299.541	0.461074	0.110879	3.20544e-05	0.0193941	erythrocyte membrane protein band 4.1-like 2
ENSG00000128917	DLL4	54.8426	0.774588	0.188868	4.1101e-05	0.0239795	delta-like 4 (Drosophila)
ENSG00000091986	CCDC80	61.9757	0.885611	0.217851	4.79896e-05	0.0241305	coiled-coil domain containing 80
ENSG00000105499	PLA2G4C	49.5288	0.694431	0.170274	4.53646e-05	0.0241305	phospholipase A2, group IVC (cytosolic, calcium-independent)
ENSG00000109046	WSB1	609.3	0.401036	0.0984375	4.62087e-05	0.0241305	WD repeat and SOCS box containing 1
ENSG00000196074	SYCP2	6.82136	0.953563	0.233262	4.35208e-05	0.0241305	synaptonemal complex protein 2
ENSG00000197405	C5AR1	48.3795	0.774784	0.19076	4.87455e-05	0.0241305	complement component 5a receptor 1
ENSG00000023445	BIRC3	141.034	0.486545	0.120956	5.75853e-05	0.0268775	baculoviral IAP repeat containing 3
ENSG00000196628	TCF4	205.402	0.420384	0.104376	5.63548e-05	0.0268775	transcription factor 4
ENSG00000077157	PPP1R12B	251.465	0.529549	0.132061	6.07513e-05	0.0273646	protein phosphatase 1, regulatory subunit 12B
ENSG00000145014	TMEM44	48.6243	0.788809	0.196949	6.1979e-05	0.0273646	transmembrane protein 44
ENSG00000137106	GRHPR	5271.96	-0.214193	0.053772	6.79494e-05	0.0292111	glyoxylate reductase/hydroxypyruvate reductase
ENSG00000106682	EIF4H	2190.86	-0.166583	0.042046	7.43515e-05	0.0303652	eukaryotic translation initiation factor 4H
ENSG00000183943	PRKX	61.5852	0.477391	0.120424	7.36304e-05	0.0303652	protein kinase, X-linked
ENSG00000183914	DNAH2	14.8382	0.984685	0.249137	7.73751e-05	0.0308293	dynein, axonemal, heavy chain 2
ENSG00000099290	FAM21A	197.037	0.575528	0.14684	8.87577e-05	0.0333429	family with sequence similarity 21, member A
ENSG00000135046	ANXA1	104.581	0.471127	0.12062	9.38891e-05	0.0333429	annexin A1
ENSG00000136059	VILL	18.663	0.651831	0.166752	9.26871e-05	0.0333429	villin-like
ENSG00000166839	ANKDD1A	22.7261	0.65369	0.167038	9.10001e-05	0.0333429	ankyrin repeat and death domain containing 1A
ENSG00000182986	ZNF320	36.9436	0.660642	0.168699	8.99941e-05	0.0333429	zinc finger protein 320
ENSG00000010322	NISCH	791.823	0.28882	0.0743333	0.000102131	0.0338002	nischarin
ENSG00000058272	PPP1R12A	314.778	0.262088	0.067562	0.000104791	0.0338002	protein phosphatase 1, regulatory subunit 12A
ENSG00000066933	MYO9A	205.832	0.47543	0.123159	0.000113251	0.0338002	myosin IXA
ENSG00000090989	EXOC1	125.162	0.349956	0.0913411	0.000127464	0.0338002	exocyst complex component 1
ENSG00000102445	KIAA0226L	21.5889	0.780565	0.20056	9.94492e-05	0.0338002	KIAA0226-like
ENSG00000111275	ALDH2	24181.6	-0.227437	0.0592658	0.000124257	0.0338002	aldehyde dehydrogenase 2 family (mitochondrial)
ENSG00000125434	SLC25A35	32.1725	0.791601	0.206747	0.000128755	0.0338002	solute carrier family 25, member 35
ENSG00000125656	CLPP	404.388	-0.290353	0.0755485	0.000121409	0.0338002	caseinolytic mitochondrial matrix peptidase proteolytic subunit
ENSG00000148180	GSN	498.019	0.423447	0.110071	0.000119553	0.0338002	gelsolin
ENSG00000159388	BTG2	111.015	0.614588	0.159616	0.000117922	0.0338002	BTG family, member 2
ENSG00000167615	LENG8	1274.04	0.395957	0.102694	0.000115403	0.0338002	leukocyte receptor cluster (LRC) member 8
ENSG00000173083	HPSE	20.5887	0.858237	0.221929	0.000110105	0.0338002	heparanase
ENSG00000173442	EHBP1L1	359.747	0.310247	0.0809804	0.000127553	0.0338002	EH domain binding protein 1-like 1
ENSG00000175054	ATR	113.112	0.485694	0.126615	0.000125065	0.0338002	ataxia telangiectasia and Rad3 related
ENSG00000182199	SHMT2	2308.11	-0.191861	0.0497049	0.000113384	0.0338002	serine hydroxymethyltransferase 2 (mitochondrial)
ENSG00000198075	SULT1C4	14.6548	0.951317	0.248659	0.000130351	0.0338002	sulfotransferase family, cytosolic, 1C, member 4
ENSG00000267106	C19orf82	24.6776	0.709514	0.183774	0.000113013	0.0338002	chromosome 19 open reading frame 82
ENSG00000100889	PCK2	7082.98	-0.246205	0.0644815	0.000134417	0.0343099	phosphoenolpyruvate carboxykinase 2 (mitochondrial)
ENSG00000079739	PGM1	2646.98	-0.268352	0.0704664	0.000139969	0.0345981	phosphoglucomutase 1
ENSG00000101004	NINL	239.905	0.466661	0.123709	0.000161784	0.0345981	ninein-like
ENSG00000107099	DOCK8	118.53	0.574218	0.15116	0.000145424	0.0345981	dedicator of cytokinesis 8
ENSG00000110237	ARHGEF17	164.859	0.505974	0.134291	0.000164721	0.0345981	Rho guanine nucleotide exchange factor (GEF) 17
ENSG00000121005	CRISPLD1	12.6047	0.820449	0.218098	0.000168674	0.0345981	cysteine-rich secretory protein LCCL domain containing 1
ENSG00000127946	HIP1	312.783	0.256231	0.0681337	0.000169432	0.0345981	huntingtin interacting protein 1
ENSG00000137959	IFI44L	131.034	0.671668	0.177258	0.000151131	0.0345981	interferon-induced protein 44-like
ENSG00000141873	SLC39A3	217.212	-0.32177	0.0854868	0.000167235	0.0345981	solute carrier family 39 (zinc transporter), member 3
ENSG00000154930	ACSS1	67.655	0.530709	0.140261	0.000154499	0.0345981	acyl-CoA synthetase short-chain family member 1
ENSG00000160310	PRMT2	229.438	0.313261	0.0822798	0.000140513	0.0345981	protein arginine methyltransferase 2
ENSG00000161791	FMNL3	89.663	0.552597	0.146714	0.000165553	0.0345981	formin-like 3
ENSG00000162645	GBP2	212.62	0.370746	0.0982788	0.000161695	0.0345981	guanylate binding protein 2, interferon-inducible
ENSG00000169554	ZEB2	218.611	0.420187	0.111527	0.000164827	0.0345981	zinc finger E-box binding homeobox 2
ENSG00000182319	SGK223	39.9904	0.686027	0.181773	0.000160594	0.0345981	Tyrosine-protein kinase SgK223
ENSG00000183963	SMTN	258.547	0.511197	0.134648	0.00014672	0.0345981	smoothelin
ENSG00000214021	TTLL3	186.721	0.475396	0.126329	0.000167787	0.0345981	tubulin tyrosine ligase-like family, member 3
ENSG00000176894	PXMP2	1664.46	-0.29759	0.0793101	0.000175263	0.0353469	peroxisomal membrane protein 2, 22kDa
ENSG00000095370	SH2D3C	63.2263	0.578672	0.155011	0.000189137	0.0354576	SH2 domain containing 3C
ENSG00000108848	LUC7L3	1890.15	0.317463	0.085468	0.000203677	0.0354576	LUC7-like 3 (S. cerevisiae)
ENSG00000117013	KCNQ4	7.69706	0.989492	0.266424	0.000204029	0.0354576	potassium voltage-gated channel, KQT-like subfamily, member 4
ENSG00000119707	RBM25	1703.88	0.35818	0.0962336	0.000197662	0.0354576	RNA binding motif protein 25
ENSG00000123329	ARHGAP9	72.4607	0.539954	0.145133	0.000198895	0.0354576	Rho GTPase activating protein 9
ENSG00000125676	THOC2	575.088	0.31452	0.0842819	0.000190146	0.0354576	THO complex 2
ENSG00000125835	SNRPB	380.351	-0.260556	0.0701356	0.000203182	0.0354576	small nuclear ribonucleoprotein polypeptides B and B1
ENSG00000130363	RSPH3	97.3873	0.431291	0.115699	0.000193245	0.0354576	radial spoke 3 homolog (Chlamydomonas)
ENSG00000131711	MAP1B	65.1139	0.686986	0.183516	0.000181494	0.0354576	microtubule-associated protein 1B
ENSG00000132507	EIF5A	2512.19	-0.204258	0.0547588	0.000191367	0.0354576	eukaryotic translation initiation factor 5A
ENSG00000173068	BNC2	9.35348	1.0538	0.282805	0.000194363	0.0354576	basonuclin 2
ENSG00000269693	CTD-2192J16.20	36.9242	0.818401	0.218818	0.000183952	0.0354576
ENSG00000100813	ACIN1	857.949	0.268777	0.0724719	0.000208316	0.0358216	apoptotic chromatin condensation inducer 1
ENSG00000213626	LBH	118.392	0.639479	0.172631	0.000211957	0.036068	limb bud and heart development
ENSG00000168807	SNTB2	183.328	0.331358	0.0896978	0.000220618	0.036381	syntrophin, beta 2 (dystrophin-associated protein A1, 59kDa, basic component 2)
ENSG00000169246	NPIPB3	465.005	0.519695	0.140518	0.000216951	0.036381	nuclear pore complex interacting protein family, member B3
ENSG00000172932	ANKRD13D	123.998	0.389322	0.10544	0.000222194	0.036381	ankyrin repeat domain 13 family, member D
ENSG00000204219	TCEA3	1317.13	-0.250077	0.0677393	0.000222705	0.036381	transcription elongation factor A (SII), 3
ENSG00000079277	MKNK1	273.071	0.320205	0.0869123	0.000229396	0.0371032	MAP kinase interacting serine/threonine kinase 1
ENSG00000107249	GLIS3	46.9334	0.571119	0.155505	0.00024003	0.0374887	GLIS family zinc finger 3
ENSG00000137133	HINT2	647.433	-0.284375	0.0773093	0.000234703	0.0374887	histidine triad nucleotide binding protein 2
ENSG00000139645	ANKRD52	264.866	0.293422	0.0799606	0.000242946	0.0374887	ankyrin repeat domain 52
ENSG00000158079	PTPDC1	22.9335	0.646855	0.176035	0.000238243	0.0374887	protein tyrosine phosphatase domain containing 1
ENSG00000184602	SNN	123.507	0.439599	0.119806	0.000243254	0.0374887	stannin
ENSG00000077782	FGFR1	144.215	0.453259	0.123701	0.000248173	0.0378893	fibroblast growth factor receptor 1
ENSG00000137462	TLR2	88.173	0.549373	0.150624	0.000264993	0.039715	toll-like receptor 2
ENSG00000117362	APH1A	1112.93	-0.190117	0.052175	0.000268613	0.0398915	APH1A gamma secretase subunit
ENSG00000004399	PLXND1	499.291	0.372592	0.102352	0.000272307	0.0400758	plexin D1
ENSG00000184117	NIPSNAP1	2256.33	-0.184263	0.0507263	0.000280694	0.0409412	nipsnap homolog 1 (C. elegans)
ENSG00000057657	PRDM1	28.5596	0.709849	0.195819	0.000288937	0.0414042	PR domain containing 1, with ZNF domain
ENSG00000153283	CD96	27.4828	0.763508	0.2108	0.000292381	0.0414165	CD96 molecule
ENSG00000154358	OBSCN	87.6277	0.52249	0.144316	0.000294093	0.0414165	obscurin, cytoskeletal calmodulin and titin-interacting RhoGEF
ENSG00000010310	GIPR	7.8391	1.12232	0.310809	0.00030507	0.0420929	gastric inhibitory polypeptide receptor
ENSG00000069535	MAOB	3057.71	-0.177912	0.0493053	0.000308114	0.0420929	monoamine oxidase B
ENSG00000072195	SPEG	26.3783	0.858516	0.238125	0.000311781	0.0420929	SPEG complex locus
ENSG00000083807	SLC27A5	9599.79	-0.250098	0.0693132	0.000308299	0.0420929	solute carrier family 27 (fatty acid transporter), member 5
ENSG00000110848	CD69	11.1478	0.972301	0.270364	0.000322826	0.0428825	CD69 molecule
ENSG00000197857	ZNF44	113.087	0.370375	0.10299	0.000322879	0.0428825	zinc finger protein 44
ENSG00000115183	TANC1	124.536	0.408276	0.113598	0.000325583	0.042893	tetratricopeptide repeat, ankyrin repeat and coiled-coil containing 1
ENSG00000108528	SLC25A11	551.037	-0.214814	0.0598416	0.000331051	0.042921	solute carrier family 25 (mitochondrial carrier; oxoglutarate carrier), member 11
ENSG00000145192	AHSG	39609.4	-0.274375	0.0764115	0.000329717	0.042921	alpha-2-HS-glycoprotein
ENSG00000007520	TSR3	459.537	-0.342469	0.0955316	0.000337238	0.0433789	TSR3, 20S rRNA accumulation, homolog (S. cerevisiae)
ENSG00000104951	IL4I1	15.2664	0.868478	0.242551	0.000342805	0.0437504	interleukin 4 induced 1
ENSG00000182963	GJC1	13.4186	0.779371	0.218412	0.000359244	0.0454931	gap junction protein, gamma 1, 45kDa
ENSG00000090104	RGS1	43.7059	1.19958	0.336373	0.000362149	0.0455082	regulator of G-protein signaling 1
ENSG00000033327	GAB2	100.133	0.467263	0.131299	0.000372588	0.0457638	GRB2-associated binding protein 2
ENSG00000099800	TIMM13	609.001	-0.278302	0.0781777	0.000371052	0.0457638	translocase of inner mitochondrial membrane 13 homolog (yeast)
ENSG00000135447	PPP1R1A	1657.38	-0.365223	0.10255	0.000368861	0.0457638	protein phosphatase 1, regulatory (inhibitor) subunit 1A
ENSG00000184984	CHRM5	10.5018	0.962787	0.270698	0.000375559	0.0457845	cholinergic receptor, muscarinic 5
ENSG00000118503	TNFAIP3	156.617	0.424952	0.119615	0.000381346	0.0458064	tumor necrosis factor, alpha-induced protein 3
ENSG00000160113	NR2F6	1646.23	-0.26118	0.0735097	0.000380875	0.0458064	nuclear receptor subfamily 2, group F, member 6
ENSG00000106772	PRUNE2	34.4892	0.797029	0.224847	0.000392961	0.0461828	prune homolog 2 (Drosophila)
ENSG00000145555	MYO10	345.792	0.364833	0.102865	0.000390052	0.0461828	myosin X
ENSG00000179761	PIPOX	4658.18	-0.148071	0.0417626	0.000391822	0.0461828	pipecolic acid oxidase
ENSG00000128203	ASPHD2	8.0025	0.914567	0.258211	0.000397194	0.0462427	aspartate beta-hydroxylase domain containing 2
ENSG00000148516	ZEB1	186.268	0.328088	0.0927094	0.000401826	0.0462427	zinc finger E-box binding homeobox 1
ENSG00000248905	FMN1	13.2861	0.989302	0.279559	0.000401963	0.0462427	formin 1
ENSG00000169429	IL8	14.4204	1.22307	0.345895	0.000406275	0.0464119	interleukin 8
ENSG00000090920	FCGBP	95.6105	0.588836	0.167571	0.000441476	0.0465362	Fc fragment of IgG binding protein
ENSG00000101444	AHCY	1420.27	-0.2041	0.0581955	0.000452941	0.0465362	adenosylhomocysteinase
ENSG00000108654	DDX5	2362.87	0.217976	0.0620951	0.000447516	0.0465362	DEAD (Asp-Glu-Ala-Asp) box helicase 5
ENSG00000110395	CBL	122.421	0.455773	0.129847	0.000447977	0.0465362	Cbl proto-oncogene, E3 ubiquitin protein ligase
ENSG00000115884	SDC1	6546.11	-0.250463	0.0710392	0.00042236	0.0465362	syndecan 1
ENSG00000123342	MMP19	30.6997	0.98613	0.280103	0.000430581	0.0465362	matrix metallopeptidase 19
ENSG00000130649	CYP2E1	70201.3	-0.219867	0.0625947	0.000443828	0.0465362	cytochrome P450, family 2, subfamily E, polypeptide 1
ENSG00000152527	PLEKHH2	52.0212	0.595651	0.169689	0.000447675	0.0465362	pleckstrin homology domain containing, family H (with MyTH4 domain) member 2
ENSG00000165359	DDX26B	21.511	0.730292	0.20817	0.000451229	0.0465362	DEAD/H (Asp-Glu-Ala-Asp/His) box polypeptide 26B
ENSG00000165795	NDRG2	3972.35	-0.192648	0.0547508	0.00043378	0.0465362	NDRG family member 2
ENSG00000167136	ENDOG	405.556	-0.357326	0.101379	0.000424009	0.0465362	endonuclease G
ENSG00000168010	ATG16L2	372.835	0.408703	0.116442	0.000448216	0.0465362	autophagy related 16-like 2 (S. cerevisiae)
ENSG00000173581	CCDC106	212.422	-0.345966	0.098068	0.000418995	0.0465362	coiled-coil domain containing 106
ENSG00000163444	TMEM183A	379.838	-0.20798	0.0594648	0.0004696	0.0479461	transmembrane protein 183A
ENSG00000109610	SOD3	73.2746	0.737298	0.211116	0.00047874	0.0482759	superoxide dismutase 3, extracellular
ENSG00000148053	NTRK2	40.4585	0.778545	0.222822	0.000475804	0.0482759	neurotrophic tyrosine kinase, receptor, type 2
ENSG00000198625	MDM4	498.646	0.315144	0.090304	0.000483351	0.0484419	Mdm4 p53 binding protein homolog (mouse)
ENSG00000078902	TOLLIP	1705.51	-0.196498	0.0563752	0.000491157	0.0486238	toll interacting protein
ENSG00000083812	ZNF324	87.7217	0.525831	0.150793	0.000488264	0.0486238	zinc finger protein 324
ENSG00000178498	DTX3	44.9882	0.566539	0.162615	0.000494096	0.0486238	deltex homolog 3 (Drosophila)
ENSG00000143520	FLG2	11.2851	-2.16337	0.621686	0.000501708	0.0486524	filaggrin family member 2
ENSG00000168071	CCDC88B	125.432	0.458619	0.131819	0.000503015	0.0486524	coiled-coil domain containing 88B
ENSG00000167549	CORO6	10.8892	0.893639	0.257609	0.000522443	0.0502037	coronin 6
ENSG00000183778	B3GALT5	8.7874	0.933156	0.269177	0.000526893	0.0503352	UDP-Gal:betaGlcNAc beta 1,3-galactosyltransferase, polypeptide 5
ENSG00000129538	RNASE1	99.433	0.52125	0.150479	0.000532346	0.0505605	ribonuclease, RNase A family, 1 (pancreatic)
ENSG00000097021	ACOT7	159.786	-0.379603	0.109738	0.000541839	0.0506592	acyl-CoA thioesterase 7
ENSG00000100354	TNRC6B	584.967	0.31	0.0896118	0.000541454	0.0506592	trinucleotide repeat containing 6B
ENSG00000111786	SRSF9	804.805	-0.188806	0.0546073	0.000545157	0.0506592	serine/arginine-rich splicing factor 9
ENSG00000120093	HOXB3	53.5348	0.619052	0.17914	0.00054889	0.0506592	homeobox B3
ENSG00000179583	CIITA	129.101	0.513556	0.148587	0.000547744	0.0506592	class II, major histocompatibility complex, transactivator
ENSG00000115380	EFEMP1	46.8007	0.725357	0.210128	0.000556488	0.0507311	EGF containing fibulin-like extracellular matrix protein 1
ENSG00000166793	YPEL4	10.1167	0.821936	0.238112	0.000556681	0.0507311	yippee-like 4 (Drosophila)
ENSG00000166816	LDHD	1740.2	-0.192347	0.0557404	0.000558986	0.0507311	lactate dehydrogenase D
ENSG00000152766	ANKRD22	7.05608	1.39311	0.404279	0.000569157	0.0512191	ankyrin repeat domain 22
ENSG00000162972	C2orf47	253.396	-0.292627	0.0850153	0.000577309	0.0512191	chromosome 2 open reading frame 47
ENSG00000185621	LMLN	67.8163	0.582451	0.169267	0.000579518	0.0512191	leishmanolysin-like (metallopeptidase M8 family)
ENSG00000198482	ZNF808	62.5839	0.545308	0.158375	0.000575013	0.0512191	zinc finger protein 808
ENSG00000143248	RGS5	418.596	0.367768	0.107272	0.000607215	0.052794	regulator of G-protein signaling 5
ENSG00000243943	ZNF512	104.202	0.353233	0.103124	0.000614034	0.052794	zinc finger protein 512
ENSG00000109062	SLC9A3R1	1385.41	-0.21343	0.0623719	0.000621868	0.0531876	solute carrier family 9, subfamily A (NHE3, cation proton antiporter 3), member 3 regulator 1
ENSG00000119760	SUPT7L	267.845	0.303946	0.0888896	0.000627678	0.053405	suppressor of Ty 7 (S. cerevisiae)-like
ENSG00000026025	VIM	1099	0.326913	0.0960395	0.000664194	0.0538734	vimentin
ENSG00000100116	GCAT	488.234	-0.272422	0.0797984	0.000640467	0.0538734	glycine C-acetyltransferase
ENSG00000142599	RERE	585.982	0.234121	0.0687941	0.000665979	0.0538734	arginine-glutamic acid dipeptide (RE) repeats
ENSG00000160305	DIP2A	245.169	0.333687	0.0979844	0.000660404	0.0538734	DIP2 disco-interacting protein 2 homolog A (Drosophila)
ENSG00000163359	COL6A3	279.096	0.449703	0.132218	0.000670857	0.0538734	collagen, type VI, alpha 3
ENSG00000164691	TAGAP	32.6598	0.585068	0.171567	0.000649305	0.0538734	T-cell activation RhoGTPase activating protein
ENSG00000166546	BEAN1	17.1188	0.797739	0.234078	0.000654403	0.0538734	brain expressed, associated with NEDD4, 1
ENSG00000173821	RNF213	1570.47	0.305204	0.0896965	0.000667422	0.0538734	ring finger protein 213
ENSG00000181264	TMEM136	11.9882	0.769728	0.225885	0.000655328	0.0538734	transmembrane protein 136
ENSG00000204842	ATXN2	334.052	0.236608	0.0693381	0.000643993	0.0538734	ataxin 2
ENSG00000138796	HADH	1319.3	-0.166881	0.0490965	0.000676231	0.0538873	hydroxyacyl-CoA dehydrogenase
ENSG00000004455	AK2	1015.44	-0.140302	0.0413989	0.000701412	0.0543039	adenylate kinase 2
ENSG00000014164	ZC3H3	257.773	0.4571	0.134928	0.000704728	0.0543039	zinc finger CCCH-type containing 3
ENSG00000100376	FAM118A	201.308	0.756142	0.22305	0.000698884	0.0543039	family with sequence similarity 118, member A
ENSG00000121966	CXCR4	52.8459	0.769018	0.226654	0.000691545	0.0543039	chemokine (C-X-C motif) receptor 4
ENSG00000166801	FAM111A	330.584	0.333926	0.0984173	0.000691406	0.0543039	family with sequence similarity 111, member A
ENSG00000166822	TMEM170A	196.912	0.229833	0.0678277	0.00070279	0.0543039	transmembrane protein 170A
ENSG00000197329	PELI1	102.309	0.384514	0.113494	0.000704126	0.0543039	pellino E3 ubiquitin protein ligase 1
ENSG00000111860	CEP85L	48.6867	0.478279	0.141523	0.000726105	0.0544112	centrosomal protein 85kDa-like
ENSG00000137841	PLCB2	194.422	0.512245	0.151333	0.000712098	0.0544112	phospholipase C, beta 2
ENSG00000140455	USP3	213.816	0.289045	0.085515	0.000724737	0.0544112	ubiquitin specific peptidase 3
ENSG00000140678	ITGAX	116.771	0.589027	0.174178	0.000720249	0.0544112	integrin, alpha X (complement component 3 receptor 4 subunit)
ENSG00000153234	NR4A2	78.4571	0.964815	0.285076	0.000713303	0.0544112	nuclear receptor subfamily 4, group A, member 2
ENSG00000163071	SPATA18	85.4746	0.500735	0.148087	0.00072127	0.0544112	spermatogenesis associated 18
ENSG00000100450	GZMH	15.6323	0.820434	0.243185	0.000741639	0.0545878	granzyme H (cathepsin G-like 2, protein h-CCPX)
ENSG00000137269	LRRC1	10.0481	0.948922	0.281005	0.000733111	0.0545878	leucine rich repeat containing 1
ENSG00000143322	ABL2	166.381	0.274957	0.0815019	0.000741828	0.0545878	c-abl oncogene 2, non-receptor tyrosine kinase
ENSG00000183172	SMDT1	405.283	-0.257773	0.0764076	0.000741778	0.0545878	single-pass membrane protein with aspartate-rich tail 1
ENSG00000164114	MAP9	18.2858	0.622968	0.18501	0.000759302	0.0553748	microtubule-associated protein 9
ENSG00000178809	TRIM73	47.1719	0.565512	0.167911	0.000757347	0.0553748	tripartite motif containing 73
ENSG00000005844	ITGAL	235.185	0.332328	0.0987434	0.000763852	0.0554591	integrin, alpha L (antigen CD11A (p180), lymphocyte function-associated antigen 1; alpha polypeptide)
ENSG00000104894	CD37	70.5075	0.476466	0.141684	0.000771368	0.055571	CD37 molecule
ENSG00000126785	RHOJ	35.5977	0.597181	0.177688	0.000777039	0.055571	ras homolog family member J
ENSG00000141298	SSH2	118.864	0.37539	0.111657	0.000773836	0.055571	slingshot protein phosphatase 2
ENSG00000196482	ESRRG	6.75069	0.934459	0.2781	0.000779001	0.055571	estrogen-related receptor gamma
ENSG00000110172	CHORDC1	148.295	0.319104	0.0950272	0.000784999	0.0557554	cysteine and histidine-rich domain (CHORD) containing 1
ENSG00000110274	CEP164	277.148	0.368569	0.109956	0.000802363	0.0562797	centrosomal protein 164kDa
ENSG00000144554	FANCD2	19.0513	0.681997	0.203454	0.000802017	0.0562797	Fanconi anemia, complementation group D2
ENSG00000153914	SREK1	852.043	0.309402	0.0923077	0.000802716	0.0562797	splicing regulatory glutamine/lysine-rich protein 1
ENSG00000174837	EMR1	24.5974	0.798276	0.238274	0.000807386	0.0563652	egf-like module containing, mucin-like, hormone receptor-like 1
ENSG00000124588	NQO2	524.466	-0.337296	0.100736	0.000813007	0.0565161	NAD(P)H dehydrogenase, quinone 2
ENSG00000103375	AQP8	15.2657	1.48176	0.443499	0.000834581	0.057092	aquaporin 8
ENSG00000135537	LACE1	39.7985	0.437903	0.131076	0.000835271	0.057092	lactation elevated 1
ENSG00000162290	DCP1A	220.68	0.237968	0.0712105	0.00083248	0.057092	decapping mRNA 1A
ENSG00000197111	PCBP2	4087.06	-0.147775	0.0442037	0.000828638	0.057092	poly(rC) binding protein 2
ENSG00000010438	PRSS3	14.2724	-0.786094	0.235449	0.000841707	0.0572922	protease, serine, 3
ENSG00000144136	SLC20A1	280.47	0.304554	0.0913213	0.000853076	0.0578251	solute carrier family 20 (phosphate transporter), member 1
ENSG00000007944	MYLIP	61.1754	0.445163	0.133801	0.000877738	0.0583645	myosin regulatory light chain interacting protein
ENSG00000076706	MCAM	97.5496	0.644898	0.193923	0.000882471	0.0583645	melanoma cell adhesion molecule
ENSG00000105270	CLIP3	28.0092	0.585005	0.175685	0.000868937	0.0583645	CAP-GLY domain containing linker protein 3
ENSG00000155876	RRAGA	363.597	-0.239402	0.0719774	0.000880813	0.0583645	Ras-related GTP binding A
ENSG00000168685	IL7R	77.5535	0.559075	0.168023	0.000876721	0.0583645	interleukin 7 receptor
ENSG00000178952	TUFM	1925.81	-0.212083	0.0637736	0.000882411	0.0583645	Tu translation elongation factor, mitochondrial
ENSG00000105135	ILVBL	936.192	-0.195065	0.058695	0.000889387	0.0585848	ilvB (bacterial acetolactate synthase)-like
ENSG00000126214	KLC1	360.203	0.248947	0.0749567	0.000896286	0.0588021	kinesin light chain 1
ENSG00000117425	PTCH2	24.2128	0.704395	0.21237	0.000910481	0.0594944	patched 2
ENSG00000155463	OXA1L	702.422	0.2332	0.0704029	0.000925092	0.0600388	oxidase (cytochrome c) assembly 1-like
ENSG00000162614	NEXN	39.2167	0.615073	0.185708	0.000926161	0.0600388	nexilin (F actin binding protein)
ENSG00000138964	PARVG	114.378	0.519761	0.157312	0.000953095	0.0606421	parvin, gamma
ENSG00000169155	ZBTB43	126.925	0.368382	0.11136	0.000939575	0.0606421	zinc finger and BTB domain containing 43
ENSG00000170323	FABP4	18.721	1.03042	0.312048	0.000959637	0.0606421	fatty acid binding protein 4, adipocyte
ENSG00000173230	GOLGB1	895.138	0.227367	0.0688583	0.000960119	0.0606421	golgin B1
ENSG00000184863	RBM33	538.933	0.283093	0.0857291	0.00095936	0.0606421	RNA binding motif protein 33
ENSG00000185864	NPIPB4	415.055	0.469259	0.142012	0.000951931	0.0606421	nuclear pore complex interacting protein family, member B4
ENSG00000008300	CELSR3	17.7221	0.70352	0.214645	0.00104693	0.0606734	cadherin, EGF LAG seven-pass G-type receptor 3
ENSG00000010295	IFFO1	198.805	0.343581	0.10486	0.00105082	0.0606734	intermediate filament family orphan 1
ENSG00000090376	IRAK3	51.456	0.638931	0.195079	0.00105572	0.0606734	interleukin-1 receptor-associated kinase 3
ENSG00000103150	MLYCD	552.187	-0.215544	0.0657815	0.00105043	0.0606734	malonyl-CoA decarboxylase
ENSG00000108622	ICAM2	57.0589	0.541026	0.164332	0.000993817	0.0606734	intercellular adhesion molecule 2
ENSG00000115568	ZNF142	91.0326	0.451539	0.137773	0.00104765	0.0606734	zinc finger protein 142
ENSG00000122490	PQLC1	2066.31	-0.210283	0.0638259	0.000985488	0.0606734	PQ loop repeat containing 1
ENSG00000124177	CHD6	401.457	0.285062	0.0870554	0.00105852	0.0606734	chromodomain helicase DNA binding protein 6
ENSG00000124813	RUNX2	13.8698	0.824497	0.250445	0.000994316	0.0606734	runt-related transcription factor 2
ENSG00000130638	ATXN10	485.114	-0.213201	0.0649409	0.00102706	0.0606734	ataxin 10
ENSG00000143333	RGS16	18.7722	0.839921	0.256126	0.00104055	0.0606734	regulator of G-protein signaling 16
ENSG00000159314	ARHGAP27	129.575	0.449234	0.137037	0.00104473	0.0606734	Rho GTPase activating protein 27
ENSG00000165283	STOML2	638.627	-0.195649	0.0596574	0.00103976	0.0606734	stomatin (EPB72)-like 2
ENSG00000166501	PRKCB	94.751	0.493293	0.150377	0.00103671	0.0606734	protein kinase C, beta
ENSG00000167524	SGK494	40.2487	0.561895	0.171072	0.00102148	0.0606734	uncharacterized serine/threonine-protein kinase SgK494
ENSG00000169169	CPT1C	14.8011	0.766585	0.233746	0.00103969	0.0606734	carnitine palmitoyltransferase 1C
ENSG00000171522	PTGER4	38.9831	0.709287	0.216607	0.00105835	0.0606734	prostaglandin E receptor 4 (subtype EP4)
ENSG00000183023	SLC8A1	69.5905	0.495807	0.150275	0.000969131	0.0606734	solute carrier family 8 (sodium/calcium exchanger), member 1
ENSG00000184897	H1FX	1263.04	-0.249592	0.0760714	0.00103431	0.0606734	H1 histone family, member X
ENSG00000186567	CEACAM19	100.954	0.426776	0.12962	0.000992918	0.0606734	carcinoembryonic antigen-related cell adhesion molecule 19
ENSG00000198933	TBKBP1	44.9392	0.506191	0.154209	0.00102887	0.0606734	TBK1 binding protein 1
ENSG00000204616	TRIM31	9.68582	1.08764	0.330879	0.00101213	0.0606734	tripartite motif containing 31
ENSG00000213132	AC022498.1	5.73477	0.93471	0.28448	0.00101736	0.0606734	Uncharacterized protein
ENSG00000244242	IFITM10	269.801	0.449855	0.136881	0.0010145	0.0606734	interferon induced transmembrane protein 10
ENSG00000073578	SDHA	2562.56	-0.189422	0.0578729	0.00106388	0.0607677	succinate dehydrogenase complex, subunit A, flavoprotein (Fp)
ENSG00000185633	NDUFA4L2	38.8987	0.570539	0.174382	0.00106877	0.0608342	NADH dehydrogenase (ubiquinone) 1 alpha subcomplex, 4-like 2
ENSG00000125144	MT1G	17073.5	-0.407996	0.124745	0.00107305	0.0608658	metallothionein 1G
ENSG00000103152	MPG	448.579	-0.26569	0.0812861	0.00108088	0.0610883	N-methylpurine-DNA glycosylase
ENSG00000224383	C17orf72	8.49762	0.791268	0.242373	0.00109591	0.0615217	chromosome 17 open reading frame 72
ENSG00000106609	TMEM248	833.903	-0.192494	0.058999	0.00110369	0.0615357	transmembrane protein 248
ENSG00000169031	COL4A3	16.557	0.863998	0.264739	0.00110013	0.0615357	collagen, type IV, alpha 3 (Goodpasture antigen)
ENSG00000196338	NLGN3	8.41775	0.868454	0.266397	0.00111412	0.0619056	neuroligin 3
ENSG00000169282	KCNAB1	23.9804	0.732031	0.224888	0.00113355	0.062772	potassium voltage-gated channel, shaker-related subfamily, beta member 1
ENSG00000056558	TRAF1	105.719	0.464478	0.14291	0.00115347	0.0632741	TNF receptor-associated factor 1
ENSG00000078618	NRD1	769.508	0.167613	0.0515564	0.00114978	0.0632741	nardilysin (N-arginine dibasic convertase)
ENSG00000122971	ACADS	2903.33	-0.231671	0.0712844	0.00115424	0.0632741	acyl-CoA dehydrogenase, C-2 to C-3 short chain
ENSG00000172716	SLFN11	53.9202	0.541085	0.166581	0.00116147	0.0634576	schlafen family member 11
ENSG00000141956	PRDM15	55.4941	0.471508	0.145266	0.00117108	0.0637189	PR domain containing 15
ENSG00000149600	COMMD7	241.598	-0.234227	0.0721994	0.00117796	0.0637189	COMM domain containing 7
ENSG00000196189	SEMA4A	23.7181	0.663648	0.204534	0.00117583	0.0637189	sema domain, immunoglobulin domain (Ig), transmembrane domain (TM) and short cytoplasmic domain, (semaphorin) 4A
ENSG00000170500	LONRF2	39.7633	0.559269	0.17249	0.00118553	0.0639171	LON peptidase N-terminal domain and ring finger 2
ENSG00000168172	HOOK3	525.057	0.272489	0.0840801	0.00119182	0.0640447	hook microtubule-tethering protein 3
ENSG00000143614	GATAD2B	236.342	0.22627	0.0698426	0.00119649	0.0640848	GATA zinc finger domain containing 2B
ENSG00000135205	CCDC146	49.5782	0.521023	0.160924	0.00120502	0.0643309	coiled-coil domain containing 146
ENSG00000130193	THEM6	460.139	-0.245181	0.0757538	0.00120986	0.0643785	thioesterase superfamily member 6
ENSG00000149451	ADAM33	11.2121	1.00673	0.311142	0.00121393	0.0643856	ADAM metallopeptidase domain 33
ENSG00000113231	PDE8B	38.8929	0.487813	0.150877	0.00122422	0.0645125	phosphodiesterase 8B
ENSG00000124201	ZNFX1	253.207	0.303946	0.0939895	0.00122142	0.0645125	zinc finger, NFX1-type containing 1
ENSG00000198435	NRARP	29.9182	0.651792	0.201668	0.00122925	0.064569	NOTCH-regulated ankyrin repeat protein
ENSG00000266714	MYO15B	580.873	0.386082	0.119495	0.00123383	0.0646021	myosin XVB pseudogene
ENSG00000071575	TRIB2	170.796	0.347959	0.108319	0.00131652	0.0646762	tribbles pseudokinase 2
ENSG00000102287	GABRE	86.5769	0.545496	0.169003	0.00124779	0.0646762	gamma-aminobutyric acid (GABA) A receptor, epsilon
ENSG00000104967	NOVA2	42.2663	0.634159	0.197177	0.00129901	0.0646762	neuro-oncological ventral antigen 2
ENSG00000113263	ITK	20.4795	0.624278	0.193891	0.00128309	0.0646762	IL2-inducible T-cell kinase
ENSG00000119681	LTBP2	60.8006	0.600754	0.187138	0.0013263	0.0646762	latent transforming growth factor beta binding protein 2
ENSG00000123636	BAZ2B	406.468	0.298928	0.0931088	0.00132494	0.0646762	bromodomain adjacent to zinc finger domain, 2B
ENSG00000128881	TTBK2	146.515	0.332441	0.103508	0.00131936	0.0646762	tau tubulin kinase 2
ENSG00000142303	ADAMTS10	112.035	0.547721	0.170252	0.00129485	0.0646762	ADAM metallopeptidase with thrombospondin type 1 motif, 10
ENSG00000142409	ZNF787	450.52	-0.245481	0.0760713	0.00125102	0.0646762	zinc finger protein 787
ENSG00000145779	TNFAIP8	53.9263	0.474896	0.147345	0.00126847	0.0646762	tumor necrosis factor, alpha-induced protein 8
ENSG00000159423	ALDH4A1	4717.8	-0.194132	0.0604691	0.0013253	0.0646762	aldehyde dehydrogenase 4 family, member A1
ENSG00000162391	FAM151A	265.777	-0.610367	0.189443	0.00127341	0.0646762	family with sequence similarity 151, member A
ENSG00000162817	C1orf115	1587.12	-0.180769	0.0561106	0.00127448	0.0646762	chromosome 1 open reading frame 115
ENSG00000169245	CXCL10	41.3336	0.76706	0.238118	0.00127594	0.0646762	chemokine (C-X-C motif) ligand 10
ENSG00000170776	AKAP13	1036.52	0.222754	0.0690868	0.00126297	0.0646762	A kinase (PRKA) anchor protein 13
ENSG00000175003	SLC22A1	8525.08	-0.222976	0.0694238	0.00131898	0.0646762	solute carrier family 22 (organic cation transporter), member 1
ENSG00000180210	F2	16023.5	-0.219489	0.0682002	0.00128953	0.0646762	coagulation factor II (thrombin)
ENSG00000183401	CCDC159	142.009	0.411752	0.128239	0.00132357	0.0646762	coiled-coil domain containing 159
ENSG00000205464	ATP6AP1L	37.885	0.540289	0.16806	0.00130509	0.0646762	ATPase, H+ transporting, lysosomal accessory protein 1-like
ENSG00000267270	AC139100.2	20.3109	0.628097	0.195494	0.00131414	0.0646762	Uncharacterized protein
ENSG00000215621	AC174470.1	17.8791	1.07394	0.334721	0.00133442	0.064878
ENSG00000076108	BAZ2A	794.536	0.290002	0.0904517	0.00134521	0.0651457	bromodomain adjacent to zinc finger domain, 2A
ENSG00000157827	FMNL2	103.482	0.399576	0.12465	0.0013479	0.0651457	formin-like 2
ENSG00000169057	MECP2	326.89	0.217084	0.0677654	0.00135785	0.0651488	methyl CpG binding protein 2 (Rett syndrome)
ENSG00000196218	RYR1	19.5724	0.736922	0.230015	0.00135627	0.0651488	ryanodine receptor 1 (skeletal)
ENSG00000243716	NPIPB5	650.865	0.448181	0.139924	0.00135993	0.0651488	nuclear pore complex interacting protein family, member B5
ENSG00000114857	NKTR	1041.98	0.380075	0.118875	0.00138738	0.0657828	natural killer-tumor recognition sequence
ENSG00000135931	ARMC9	17.7769	0.616808	0.192941	0.00138927	0.0657828	armadillo repeat containing 9
ENSG00000137507	LRRC32	112.155	0.458311	0.14334	0.00138686	0.0657828	leucine rich repeat containing 32
ENSG00000163660	CCNL1	894.884	0.294363	0.0920459	0.00138384	0.0657828	cyclin L1
ENSG00000170949	ZNF160	165.553	0.420067	0.13147	0.00139756	0.0659843	zinc finger protein 160
ENSG00000078053	AMPH	10.9297	0.824527	0.259417	0.00148099	0.0660903	amphiphysin
ENSG00000101096	NFATC2	133.849	0.395366	0.12445	0.0014886	0.0660903	nuclear factor of activated T-cells, cytoplasmic, calcineurin-dependent 2
ENSG00000110583	NAA40	92.6928	0.360491	0.113064	0.00143076	0.0660903	N(alpha)-acetyltransferase 40, NatD catalytic subunit
ENSG00000119397	CNTRL	71.6933	0.43294	0.135957	0.00145059	0.0660903	centriolin
ENSG00000119673	ACOT2	1692.66	-0.254745	0.0799778	0.00144656	0.0660903	acyl-CoA thioesterase 2
ENSG00000123297	TSFM	324.688	-0.263612	0.0828349	0.00146069	0.0660903	Ts translation elongation factor, mitochondrial
ENSG00000127337	YEATS4	66.4379	-0.404314	0.127006	0.0014554	0.0660903	YEATS domain containing 4
ENSG00000131386	GALNT15	17.9215	0.892213	0.280662	0.00147805	0.0660903	UDP-N-acetyl-alpha-D-galactosamine:polypeptide N-acetylgalactosaminyltransferase 15
ENSG00000133019	CHRM3	24.1994	0.818097	0.257582	0.00149286	0.0660903	cholinergic receptor, muscarinic 3
ENSG00000139718	SETD1B	297.119	0.344243	0.108168	0.00146015	0.0660903	SET domain containing 1B
ENSG00000142507	PSMB6	601.044	-0.244862	0.0769731	0.00146701	0.0660903	proteasome (prosome, macropain) subunit, beta type, 6
ENSG00000147650	LRP12	19.7487	0.64155	0.201677	0.00146732	0.0660903	low density lipoprotein receptor-related protein 12
ENSG00000150054	MPP7	30.7751	0.542335	0.170432	0.00146205	0.0660903	membrane protein, palmitoylated 7 (MAGUK p55 subfamily member 7)
ENSG00000166228	PCBD1	2401.69	-0.215828	0.0678747	0.00147378	0.0660903	pterin-4 alpha-carbinolamine dehydratase/dimerization cofactor of hepatocyte nuclear factor 1 alpha
ENSG00000167969	ECI1	1779.15	-0.232674	0.0731888	0.00147739	0.0660903	enoyl-CoA delta isomerase 1
ENSG00000169562	GJB1	3719.57	-0.226722	0.0711547	0.00144091	0.0660903	gap junction protein, beta 1, 32kDa
ENSG00000170889	RPS9	5990.06	-0.241931	0.0759691	0.00144957	0.0660903	ribosomal protein S9
ENSG00000183496	MEX3B	8.0753	0.804912	0.253388	0.0014901	0.0660903	mex-3 RNA binding family member B
ENSG00000184226	PCDH9	34.3109	0.516027	0.162034	0.00144914	0.0660903	protocadherin 9
ENSG00000198198	SZT2	348.971	0.303448	0.0953869	0.0014665	0.0660903	seizure threshold 2 homolog (mouse)
ENSG00000228300	C19orf24	440.53	-0.27917	0.0875545	0.00142999	0.0660903	chromosome 19 open reading frame 24
ENSG00000243989	ACY1	2234.49	-0.192014	0.0604148	0.00148164	0.0660903	aminoacylase 1
ENSG00000123200	ZC3H13	1524.9	0.344444	0.108562	0.00150989	0.0664841	zinc finger CCCH-type containing 13
ENSG00000059804	SLC2A3	58.2367	0.669803	0.211162	0.00151402	0.0664866	solute carrier family 2 (facilitated glucose transporter), member 3
ENSG00000004534	RBM6	842.271	0.324411	0.102349	0.00152613	0.0665453	RNA binding motif protein 6
ENSG00000127511	SIN3B	388.704	0.337557	0.106532	0.00153185	0.0665453	SIN3 transcription regulator family member B
ENSG00000167377	ZNF23	83.6523	0.348446	0.10995	0.00152903	0.0665453	zinc finger protein 23
ENSG00000176171	BNIP3	1087.14	-0.18918	0.0596919	0.00152815	0.0665453	BCL2/adenovirus E1B 19kDa interacting protein 3
ENSG00000197461	PDGFA	27.4867	0.527076	0.166383	0.00153572	0.0665453	platelet-derived growth factor alpha polypeptide
ENSG00000123096	SSPN	7.19734	0.95392	0.301282	0.00154444	0.0665698	sarcospan
ENSG00000146039	SLC17A4	552.685	0.309885	0.0978537	0.00154114	0.0665698	solute carrier family 17, member 4
ENSG00000100075	SLC25A1	1259.12	-0.245475	0.0775886	0.0015572	0.0667677	solute carrier family 25 (mitochondrial carrier; citrate transporter), member 1
ENSG00000143222	UFC1	338.642	-0.225531	0.0712681	0.00155328	0.0667677	ubiquitin-fold modifier conjugating enzyme 1
ENSG00000196924	FLNA	887.346	0.443538	0.140266	0.00156623	0.0669789	filamin A, alpha
ENSG00000091592	NLRP1	147.404	0.395256	0.125035	0.0015714	0.0670247	NLR family, pyrin domain containing 1
ENSG00000151388	ADAMTS12	19.3286	0.677894	0.214617	0.00158519	0.0673992	ADAM metallopeptidase with thrombospondin type 1 motif, 12
ENSG00000168159	RNF187	653.503	-0.232067	0.0734851	0.00158844	0.0673992	ring finger protein 187
ENSG00000170004	CHD3	175.672	0.305688	0.0968631	0.00160017	0.067721	chromodomain helicase DNA binding protein 3
ENSG00000129467	ADCY4	58.4863	0.64071	0.203316	0.00162544	0.0686128	adenylate cyclase 4
ENSG00000087074	PPP1R15A	160.091	0.36284	0.115277	0.00164637	0.068922	protein phosphatase 1, regulatory subunit 15A
ENSG00000110888	CAPRIN2	150.958	0.356804	0.113379	0.00164963	0.068922	caprin family member 2
ENSG00000117713	ARID1A	691.296	0.209193	0.0664759	0.00165014	0.068922	AT rich interactive domain 1A (SWI-like)
ENSG00000140563	MCTP2	19.6596	0.743334	0.236373	0.0016623	0.068922	multiple C2 domains, transmembrane 2
ENSG00000178860	MSC	20.2788	0.745904	0.237122	0.00165713	0.068922	musculin
ENSG00000184347	SLIT3	39.227	0.719675	0.228816	0.00165967	0.068922	slit homolog 3 (Drosophila)
ENSG00000160075	SSU72	771.65	-0.182481	0.0580443	0.00166756	0.0689652	SSU72 RNA polymerase II CTD phosphatase homolog (S. cerevisiae)
ENSG00000149596	JPH2	5.58816	1.16098	0.369431	0.00167452	0.0689659	junctophilin 2
ENSG00000158636	C11orf30	106.402	0.394354	0.125526	0.00168024	0.0689659	chromosome 11 open reading frame 30
ENSG00000204514	ZNF814	139.833	0.316857	0.100858	0.00168024	0.0689659	zinc finger protein 814
ENSG00000147526	TACC1	523.118	0.24979	0.0796345	0.00170858	0.0698303	transforming, acidic coiled-coil containing protein 1
ENSG00000213563	C8orf82	1243.93	-0.2376	0.0757534	0.00170985	0.0698303	chromosome 8 open reading frame 82
ENSG00000079974	RABL2B	112.646	0.391438	0.125076	0.00175045	0.0713101	RAB, member of RAS oncogene family-like 2B
ENSG00000089248	ERP29	1622.09	-0.224505	0.0718949	0.00179209	0.0714964	endoplasmic reticulum protein 29
ENSG00000130811	EIF3G	803.771	-0.213186	0.0682683	0.00179157	0.0714964	eukaryotic translation initiation factor 3, subunit G
ENSG00000166888	STAT6	1604.27	0.232273	0.0743122	0.00177419	0.0714964	signal transducer and activator of transcription 6, interleukin-4 induced
ENSG00000167671	UBXN6	1357.67	-0.21455	0.068656	0.00177805	0.0714964	UBX domain protein 6
ENSG00000167747	C19orf48	163.489	-0.291835	0.0933697	0.00177452	0.0714964	chromosome 19 open reading frame 48
ENSG00000169248	CXCL11	5.174	1.03346	0.330782	0.00178226	0.0714964	chemokine (C-X-C motif) ligand 11
ENSG00000182463	TSHZ2	453.746	0.295445	0.0945931	0.00178822	0.0714964	teashirt zinc finger homeobox 2
ENSG00000187608	ISG15	285.631	0.583952	0.186852	0.0017768	0.0714964	ISG15 ubiquitin-like modifier
ENSG00000249437	NAIP	221.489	0.435819	0.139582	0.00179441	0.0714964	NLR family, apoptosis inhibitory protein
ENSG00000074657	ZNF532	69.7966	0.460066	0.147451	0.00180769	0.0715171	zinc finger protein 532
ENSG00000155363	MOV10	553.419	0.247225	0.0792254	0.00180531	0.0715171	Mov10, Moloney leukemia virus 10, homolog (mouse)
ENSG00000204228	HSD17B8	475.649	-0.297992	0.095508	0.00180807	0.0715171	hydroxysteroid (17-beta) dehydrogenase 8
ENSG00000080845	DLGAP4	277.716	0.280863	0.090071	0.00181937	0.0715845	discs, large (Drosophila) homolog-associated protein 4
ENSG00000153214	TMEM87B	96.0343	0.316921	0.101653	0.00182292	0.0715845	transmembrane protein 87B
ENSG00000185565	LSAMP	7.74086	0.94908	0.304343	0.00181804	0.0715845	limbic system-associated membrane protein
ENSG00000142347	MYO1F	277.78	0.314268	0.10084	0.00183003	0.0716917	myosin IF
ENSG00000072121	ZFYVE26	168.309	0.337343	0.108278	0.00183614	0.0717588	zinc finger, FYVE domain containing 26
ENSG00000115524	SF3B1	1812.56	0.212524	0.0682584	0.00184868	0.0720764	splicing factor 3b, subunit 1, 155kDa
ENSG00000079337	RAPGEF3	66.7672	0.503777	0.161978	0.00186991	0.072518	Rap guanine nucleotide exchange factor (GEF) 3
ENSG00000137073	UBAP2	117.149	0.325774	0.104764	0.00187332	0.072518	ubiquitin associated protein 2
ENSG00000160613	PCSK7	459.353	0.281204	0.0904045	0.00186768	0.072518	proprotein convertase subtilisin/kexin type 7
ENSG00000108479	GALK1	1693.29	-0.303626	0.0976709	0.00187937	0.0725803	galactokinase 1
ENSG00000172215	CXCR6	17.0495	0.583995	0.188103	0.001905	0.0733664	chemokine (C-X-C motif) receptor 6
ENSG00000099991	CABIN1	289.602	0.299769	0.0966805	0.00193122	0.0740574	calcineurin binding protein 1
ENSG00000129472	RAB2B	133.573	0.382926	0.123567	0.0019422	0.0743039	RAB2B, member RAS oncogene family
ENSG00000100281	HMGXB4	124.247	0.299068	0.0966337	0.00196902	0.0748045	HMG box domain containing 4
ENSG00000116731	PRDM2	169.274	0.285672	0.0923029	0.0019685	0.0748045	PR domain containing 2, with ZNF domain
ENSG00000067445	TRO	244.172	0.371328	0.120094	0.00198836	0.075051	trophinin
ENSG00000101109	STK4	186.606	0.235555	0.0761675	0.00198415	0.075051	serine/threonine kinase 4
ENSG00000163482	STK36	124.729	0.328888	0.106373	0.00198929	0.075051	serine/threonine kinase 36
ENSG00000173546	CSPG4	38.3251	0.802308	0.259583	0.00199648	0.0751488	chondroitin sulfate proteoglycan 4
ENSG00000162654	GBP4	267.329	0.341043	0.110463	0.00201924	0.0756568	guanylate binding protein 4
ENSG00000163947	ARHGEF3	45.1058	0.437198	0.141586	0.002016	0.0756568	Rho guanine nucleotide exchange factor (GEF) 3
ENSG00000006607	FARP2	367.481	0.240828	0.0782103	0.00207532	0.0762874	FERM, RhoGEF and pleckstrin domain protein 2
ENSG00000073756	PTGS2	9.9516	0.882883	0.286818	0.00208255	0.0762874	prostaglandin-endoperoxide synthase 2 (prostaglandin G/H synthase and cyclooxygenase)
ENSG00000105699	LSR	1832.48	-0.230269	0.0748238	0.00208753	0.0762874	lipolysis stimulated lipoprotein receptor
ENSG00000109063	MYH3	63.2727	0.530499	0.172156	0.00205962	0.0762874	myosin, heavy chain 3, skeletal muscle, embryonic
ENSG00000118523	CTGF	112.886	0.624034	0.203096	0.00212199	0.0762874	connective tissue growth factor
ENSG00000125735	TNFSF14	271.686	0.502293	0.163229	0.00208933	0.0762874	tumor necrosis factor (ligand) superfamily, member 14
ENSG00000128482	RNF112	11.1382	0.750023	0.243851	0.00209982	0.0762874	ring finger protein 112
ENSG00000137817	PARP6	203.229	0.328152	0.106652	0.00209212	0.0762874	poly (ADP-ribose) polymerase family, member 6
ENSG00000149527	PLCH2	82.0147	0.663305	0.215529	0.00208699	0.0762874	phospholipase C, eta 2
ENSG00000156466	GDF6	9.74096	0.834601	0.271697	0.00212766	0.0762874	growth differentiation factor 6
ENSG00000157404	KIT	13.8002	0.67516	0.219733	0.00212171	0.0762874	v-kit Hardy-Zuckerman 4 feline sarcoma viral oncogene homolog
ENSG00000165264	NDUFB6	372.317	-0.24567	0.0798134	0.00208362	0.0762874	NADH dehydrogenase (ubiquinone) 1 beta subcomplex, 6, 17kDa
ENSG00000167065	DUSP18	19.2272	0.628296	0.204117	0.00208312	0.0762874	dual specificity phosphatase 18
ENSG00000176597	B3GNT5	20.2492	0.860591	0.280065	0.00212039	0.0762874	UDP-GlcNAc:betaGal beta-1,3-N-acetylglucosaminyltransferase 5
ENSG00000181381	DDX60L	193.817	0.361484	0.117627	0.00211815	0.0762874	DEAD (Asp-Glu-Ala-Asp) box polypeptide 60-like
ENSG00000188042	ARL4C	133.375	0.399552	0.130081	0.00212947	0.0762874	ADP-ribosylation factor-like 4C
ENSG00000198315	ZKSCAN8	160.702	0.372824	0.121244	0.00210511	0.0762874	zinc finger with KRAB and SCAN domains 8
ENSG00000205364	MT1M	679.346	-0.434545	0.141066	0.00206697	0.0762874	metallothionein 1M
ENSG00000256269	HMBS	119.306	-0.293982	0.0956078	0.0021059	0.0762874	hydroxymethylbilane synthase
ENSG00000170915	PAQR8	24.5164	0.595318	0.194449	0.00220181	0.0787062	progestin and adipoQ receptor family member VIII
ENSG00000102119	EMD	257.136	-0.201642	0.0659947	0.0022474	0.0801607	emerin
ENSG00000134061	CD180	27.4168	0.713441	0.233569	0.00225421	0.0802284	CD180 molecule
ENSG00000062582	MRPS24	604.898	-0.25707	0.0842356	0.00227476	0.0806085	mitochondrial ribosomal protein S24
ENSG00000125089	SH3TC1	357.154	0.311768	0.10215	0.0022728	0.0806085	SH3 domain and tetratricopeptide repeats 1
ENSG00000089820	ARHGAP4	187.572	0.367873	0.120719	0.00230859	0.0811453	Rho GTPase activating protein 4
ENSG00000135083	CCNJL	8.85055	0.703768	0.230898	0.00230402	0.0811453	cyclin J-like
ENSG00000139629	GALNT6	21.6908	0.570659	0.187303	0.00231352	0.0811453	UDP-N-acetyl-alpha-D-galactosamine:polypeptide N-acetylgalactosaminyltransferase 6 (GalNAc-T6)
ENSG00000164308	ERAP2	264.069	0.71447	0.234517	0.00231475	0.0811453	endoplasmic reticulum aminopeptidase 2
ENSG00000167191	GPRC5B	87.4344	0.416565	0.136688	0.00230701	0.0811453	G protein-coupled receptor, family C, group 5, member B
ENSG00000082684	SEMA5B	18.0387	0.680091	0.223693	0.00236356	0.0823573	sema domain, seven thrombospondin repeats (type 1 and type 1-like), transmembrane domain (TM) and short cytoplasmic domain, (semaphorin) 5B
ENSG00000131051	RBM39	1498.77	0.236044	0.0776165	0.00235668	0.0823573	RNA binding motif protein 39
ENSG00000162576	MXRA8	136.933	0.481246	0.158296	0.00236445	0.0823573	matrix-remodelling associated 8
ENSG00000018189	RUFY3	211.976	0.310825	0.102274	0.00237261	0.0824087	RUN and FYVE domain containing 3
ENSG00000053371	AKR7A2	506.178	-0.219145	0.0721371	0.00238234	0.0824087	aldo-keto reductase family 7, member A2 (aflatoxin aldehyde reductase)
ENSG00000109452	INPP4B	17.6772	0.662625	0.218154	0.0023861	0.0824087	inositol polyphosphate-4-phosphatase, type II, 105kDa
ENSG00000026950	BTN3A1	249.544	0.289187	0.095281	0.00240456	0.0826967	butyrophilin, subfamily 3, member A1
ENSG00000215018	COL28A1	24.9604	0.762358	0.251153	0.00240191	0.0826967	collagen, type XXVIII, alpha 1
ENSG00000048740	CELF2	80.4657	0.461345	0.152106	0.00242091	0.0827363	CUGBP, Elav-like family member 2
ENSG00000055163	CYFIP2	283.597	0.595418	0.196299	0.00241955	0.0827363	cytoplasmic FMR1 interacting protein 2
ENSG00000104870	FCGRT	3868.49	-0.199684	0.0658115	0.00241191	0.0827363	Fc fragment of IgG, receptor, transporter, alpha
ENSG00000104524	PYCRL	117.24	-0.283565	0.0936167	0.00245366	0.0831774	pyrroline-5-carboxylate reductase-like
ENSG00000130227	XPO7	287.081	0.212889	0.0702791	0.00245201	0.0831774	exportin 7
ENSG00000173209	AHSA2	714.945	0.351938	0.116192	0.00245418	0.0831774	AHA1, activator of heat shock 90kDa protein ATPase homolog 2 (yeast)
ENSG00000176209	SMIM19	426.387	-0.242597	0.0800728	0.00244787	0.0831774	small integral membrane protein 19
ENSG00000172578	KLHL6	31.913	0.625321	0.206576	0.00246926	0.0835153	kelch-like family member 6
ENSG00000131061	ZNF341	34.3176	0.434713	0.143643	0.00247521	0.0835435	zinc finger protein 341
ENSG00000267467	APOC4	3287.94	-0.329402	0.108928	0.00249424	0.0840123	apolipoprotein C-IV
ENSG00000167315	ACAA2	6145.75	-0.22987	0.0760474	0.00250509	0.084204	acetyl-CoA acyltransferase 2
ENSG00000161016	RPL8	6206.03	-0.236675	0.0783298	0.00251503	0.0843647	ribosomal protein L8
ENSG00000058673	ZC3H11A	1224.93	0.225094	0.0745203	0.00252294	0.0844565	zinc finger CCCH-type containing 11A
ENSG00000158552	ZFAND2B	316.521	-0.205902	0.0681845	0.00252964	0.0845077	zinc finger, AN1-type domain 2B
ENSG00000133256	PDE6B	5.05602	0.817719	0.271016	0.00255097	0.0850463	phosphodiesterase 6B, cGMP-specific, rod, beta
ENSG00000170430	MGMT	1056.93	-0.277413	0.0919823	0.00256184	0.0850614	O-6-methylguanine-DNA methyltransferase
ENSG00000105373	GLTSCR2	2566.15	-0.222342	0.0737469	0.00257039	0.0851723	glioma tumor suppressor candidate region gene 2
ENSG00000005022	SLC25A5	1938.77	-0.165559	0.0553332	0.00277125	0.0857915	solute carrier family 25 (mitochondrial carrier; adenine nucleotide translocator), member 5
ENSG00000059122	FLYWCH1	268.539	0.335628	0.111944	0.00271591	0.0857915	FLYWCH-type zinc finger 1
ENSG00000059377	TBXAS1	79.6555	0.526105	0.17601	0.00279829	0.0857915	thromboxane A synthase 1 (platelet)
ENSG00000062282	DGAT2	5675.39	-0.328903	0.109397	0.00264271	0.0857915	diacylglycerol O-acyltransferase 2
ENSG00000065357	DGKA	36.7778	0.520532	0.174224	0.00281075	0.0857915	diacylglycerol kinase, alpha 80kDa
ENSG00000075785	RAB7A	1478.04	-0.156246	0.0519148	0.00261546	0.0857915	RAB7A, member RAS oncogene family
ENSG00000100201	DDX17	3338.09	0.225643	0.0752957	0.00272869	0.0857915	DEAD (Asp-Glu-Ala-Asp) box helicase 17
ENSG00000103811	CTSH	1021.86	-0.224679	0.0751561	0.0027944	0.0857915	cathepsin H
ENSG00000105058	FAM32A	420.191	-0.190686	0.063582	0.00270813	0.0857915	family with sequence similarity 32, member A
ENSG00000107611	CUBN	7.23939	0.780371	0.260731	0.00276239	0.0857915	cubilin (intrinsic factor-cobalamin receptor)
ENSG00000109390	NDUFC1	316.918	-0.229531	0.0768968	0.00283646	0.0857915	NADH dehydrogenase (ubiquinone) 1, subcomplex unknown, 1, 6kDa
ENSG00000109920	FNBP4	435.924	0.300056	0.0997908	0.00263973	0.0857915	formin binding protein 4
ENSG00000111674	ENO2	31.0028	0.519879	0.173572	0.00274291	0.0857915	enolase 2 (gamma, neuronal)
ENSG00000115461	IGFBP5	490.066	0.418995	0.14043	0.00284816	0.0857915	insulin-like growth factor binding protein 5
ENSG00000116584	ARHGEF2	131.07	0.358215	0.119186	0.00265125	0.0857915	Rho/Rac guanine nucleotide exchange factor (GEF) 2
ENSG00000118369	USP35	145.36	0.485661	0.161512	0.00263876	0.0857915	ubiquitin specific peptidase 35
ENSG00000118495	PLAGL1	33.2255	0.515639	0.172455	0.00278985	0.0857915	pleiomorphic adenoma gene-like 1
ENSG00000124574	ABCC10	87.9242	0.444039	0.147568	0.00262069	0.0857915	ATP-binding cassette, sub-family C (CFTR/MRP), member 10
ENSG00000126878	AIF1L	30.3594	0.60418	0.201648	0.00273353	0.0857915	allograft inflammatory factor 1-like
ENSG00000132780	NASP	492.513	0.215376	0.0718988	0.00273962	0.0857915	nuclear autoantigenic sperm protein (histone-binding)
ENSG00000133030	MPRIP	1122.82	0.223681	0.0749224	0.00283116	0.0857915	myosin phosphatase Rho interacting protein
ENSG00000133808	MICALCL	6.09862	0.892529	0.298936	0.00282941	0.0857915	MICAL C-terminal like
ENSG00000135390	ATP5G2	1007.6	-0.223621	0.0747307	0.00276833	0.0857915	ATP synthase, H+ transporting, mitochondrial Fo complex, subunit C2 (subunit 9)
ENSG00000137101	CD72	30.9776	0.651953	0.217343	0.00270296	0.0857915	CD72 molecule
ENSG00000140368	PSTPIP1	24.0251	0.58372	0.194629	0.00270737	0.0857915	proline-serine-threonine phosphatase interacting protein 1
ENSG00000140990	NDUFB10	610.986	-0.19898	0.0665792	0.00280238	0.0857915	NADH dehydrogenase (ubiquinone) 1 beta subcomplex, 10, 22kDa
ENSG00000143442	POGZ	614.78	0.297738	0.0996995	0.00282325	0.0857915	pogo transposable element with ZNF domain
ENSG00000144579	CTDSP1	1265.72	-0.13107	0.0436985	0.00270508	0.0857915	CTD (carboxy-terminal domain, RNA polymerase II, polypeptide A) small phosphatase 1
ENSG00000165168	CYBB	265.647	0.510154	0.170887	0.00283281	0.0857915	cytochrome b-245, beta polypeptide
ENSG00000168118	RAB4A	368.767	-0.248686	0.0833883	0.00286121	0.0857915	RAB4A, member RAS oncogene family
ENSG00000169744	LDB2	178.627	0.372209	0.124787	0.0028566	0.0857915	LIM domain binding 2
ENSG00000171227	TMEM37	536.74	-0.230852	0.0772632	0.00280934	0.0857915	transmembrane protein 37
ENSG00000173320	STOX2	93.4164	0.419058	0.140129	0.00278505	0.0857915	storkhead box 2
ENSG00000178878	APOLD1	46.3137	0.70966	0.236109	0.00265019	0.0857915	apolipoprotein L domain containing 1
ENSG00000179364	PACS2	302.734	0.256779	0.0860723	0.00285165	0.0857915	phosphofurin acidic cluster sorting protein 2
ENSG00000182327	GLTPD2	1236.98	-0.317211	0.10561	0.00266809	0.0857915	glycolipid transfer protein domain containing 2
ENSG00000184611	KCNH7	7.41875	0.877549	0.292692	0.00271583	0.0857915	potassium voltage-gated channel, subfamily H (eag-related), member 7
ENSG00000187840	EIF4EBP1	342.795	-0.238706	0.0798827	0.00280615	0.0857915	eukaryotic translation initiation factor 4E binding protein 1
ENSG00000197114	ZGPAT	2374.44	-0.261305	0.0872352	0.00274079	0.0857915	zinc finger, CCCH-type with G patch domain
ENSG00000197157	SND1	1469.37	-0.182977	0.0612674	0.00282167	0.0857915	staphylococcal nuclease and tudor domain containing 1
ENSG00000198707	CEP290	90.5744	0.496587	0.165839	0.00274988	0.0857915	centrosomal protein 290kDa
ENSG00000198799	LRIG2	135.13	0.359298	0.119417	0.00262311	0.0857915	leucine-rich repeats and immunoglobulin-like domains 2
ENSG00000230055	CISD3	1267.13	-0.246231	0.0820423	0.00268857	0.0857915	CDGSH iron sulfur domain 3
ENSG00000244693	CTAGE8	15.6129	0.939438	0.314526	0.00281881	0.0857915	CTAGE family, member 8
ENSG00000248098	BCKDHA	796.534	-0.341405	0.114418	0.0028466	0.0857915	branched chain keto acid dehydrogenase E1, alpha polypeptide
ENSG00000250091	DNAH10OS	20.0406	0.701296	0.234183	0.00274763	0.0857915	dynein, axonemal, heavy chain 10 opposite strand
ENSG00000019144	PHLDB1	152.476	0.438767	0.14747	0.00292705	0.0863084	pleckstrin homology-like domain, family B, member 1
ENSG00000035928	RFC1	416.546	0.172668	0.0580851	0.00295218	0.0863084	replication factor C (activator 1) 1, 145kDa
ENSG00000077348	EXOSC5	113.474	-0.333448	0.11233	0.00299284	0.0863084	exosome component 5
ENSG00000105364	MRPL4	445.798	-0.172933	0.0580812	0.00290676	0.0863084	mitochondrial ribosomal protein L4
ENSG00000132718	SYT11	33.5971	0.557321	0.187669	0.00298088	0.0863084	synaptotagmin XI
ENSG00000134899	ERCC5	490.186	0.221264	0.0743963	0.00293819	0.0863084	excision repair cross-complementing rodent repair deficiency, complementation group 5
ENSG00000139372	TDG	131.591	0.324791	0.109231	0.00294484	0.0863084	thymine-DNA glycosylase
ENSG00000141506	PIK3R5	58.7192	0.495152	0.166418	0.00292658	0.0863084	phosphoinositide-3-kinase, regulatory subunit 5
ENSG00000143158	MPC2	2284.61	-0.195603	0.0658431	0.0029708	0.0863084	mitochondrial pyruvate carrier 2
ENSG00000147144	CCDC120	77.0521	0.394629	0.132917	0.0029879	0.0863084	coiled-coil domain containing 120
ENSG00000151150	ANK3	132.9	0.397942	0.133968	0.00297392	0.0863084	ankyrin 3, node of Ranvier (ankyrin G)
ENSG00000151474	FRMD4A	282.363	0.349219	0.117331	0.00291701	0.0863084	FERM domain containing 4A
ENSG00000157613	CREB3L1	5.91372	0.944379	0.316989	0.00288982	0.0863084	cAMP responsive element binding protein 3-like 1
ENSG00000173805	HAP1	13.1053	0.731265	0.246368	0.00299565	0.0863084	huntingtin-associated protein 1
ENSG00000178096	BOLA1	133.263	-0.260754	0.0875346	0.00289312	0.0863084	bolA family member 1
ENSG00000180071	ANKRD18A	23.1159	0.696932	0.234755	0.00298997	0.0863084	ankyrin repeat domain 18A
ENSG00000184470	TXNRD2	612.272	-0.209109	0.0703853	0.00296911	0.0863084	thioredoxin reductase 2
ENSG00000213366	GSTM2	208.877	0.497743	0.167382	0.0029424	0.0863084	glutathione S-transferase mu 2 (muscle)
ENSG00000213923	CSNK1E	260.57	0.203423	0.0683057	0.00290017	0.0863084	casein kinase 1, epsilon
ENSG00000010327	STAB1	1506.32	0.369865	0.124638	0.0030022	0.086345	stabilin 1
ENSG00000031081	ARHGAP31	76.187	0.47666	0.160761	0.00302662	0.0864386	Rho GTPase activating protein 31
ENSG00000114120	SLC25A36	69.2331	0.444212	0.149801	0.00302343	0.0864386	solute carrier family 25 (pyrimidine nucleotide carrier ), member 36
ENSG00000167077	MEI1	6.39769	0.871375	0.293885	0.0030266	0.0864386	meiosis inhibitor 1
ENSG00000167978	SRRM2	6751.9	0.334777	0.112868	0.0030161	0.0864386	serine/arginine repetitive matrix 2
ENSG00000105609	LILRB5	173.7	0.543058	0.18328	0.00304663	0.0868583	leukocyte immunoglobulin-like receptor, subfamily B (with TM and ITIM domains), member 5
ENSG00000129514	FOXA1	381.363	-0.214584	0.0724573	0.00306122	0.0869707	forkhead box A1
ENSG00000073605	GSDMB	869.643	0.350887	0.118607	0.00309248	0.0875213	gasdermin B
ENSG00000140105	WARS	321.288	0.264091	0.0892809	0.00309668	0.0875213	tryptophanyl-tRNA synthetase
ENSG00000187713	TMEM203	299.89	-0.244986	0.082807	0.00309121	0.0875213	transmembrane protein 203
ENSG00000138834	MAPK8IP3	751.512	0.343883	0.116305	0.00310905	0.0877175	mitogen-activated protein kinase 8 interacting protein 3
ENSG00000159208	C1orf51	39.6302	0.678099	0.22938	0.00311436	0.0877175	chromosome 1 open reading frame 51
ENSG00000073331	ALPK1	96.6137	0.441552	0.149451	0.00313185	0.0880582	alpha-kinase 1
ENSG00000132530	XAF1	884.558	0.345751	0.117057	0.00313982	0.0880667	XIAP associated factor 1
ENSG00000198203	SULT1C2	14.3045	1.0445	0.353662	0.00314293	0.0880667	sulfotransferase family, cytosolic, 1C, member 2
ENSG00000115484	CCT4	486.115	-0.207057	0.0701639	0.00316698	0.0883874	chaperonin containing TCP1, subunit 4 (delta)
ENSG00000130159	ECSIT	416.242	-0.239865	0.0812804	0.00316663	0.0883874	ECSIT signalling integrator
ENSG00000244187	TMEM141	449.523	-0.244239	0.082808	0.0031833	0.0885901	transmembrane protein 141
ENSG00000103196	CRISPLD2	89.7306	0.500276	0.169714	0.00320075	0.0887733	cysteine-rich secretory protein LCCL domain containing 2
ENSG00000185215	TNFAIP2	757.756	0.321455	0.109032	0.00319575	0.0887733	tumor necrosis factor, alpha-induced protein 2
ENSG00000086504	MRPL28	453.208	-0.212502	0.0721346	0.00322008	0.089085	mitochondrial ribosomal protein L28
ENSG00000180616	SSTR2	11.5209	0.778497	0.264288	0.0032229	0.089085	somatostatin receptor 2
ENSG00000160654	CD3G	12.5139	0.760761	0.258468	0.00324678	0.089292	CD3g molecule, gamma (CD3-TCR complex)
ENSG00000167792	NDUFV1	1926.41	-0.185838	0.0631341	0.00324486	0.089292	NADH dehydrogenase (ubiquinone) flavoprotein 1, 51kDa
ENSG00000170153	RNF150	32.264	0.607577	0.20648	0.0032552	0.0893731	ring finger protein 150
ENSG00000204291	COL15A1	10.8562	0.836337	0.284495	0.00328507	0.0898909	collagen, type XV, alpha 1
ENSG00000008382	MPND	394.956	-0.259313	0.0883306	0.00332784	0.0900513	MPN domain containing
ENSG00000011114	BTBD7	181.443	0.305598	0.104086	0.00332459	0.0900513	BTB (POZ) domain containing 7
ENSG00000106344	RBM28	192.386	0.282386	0.0962114	0.00333485	0.0900513	RNA binding motif protein 28
ENSG00000124702	KLHDC3	792.496	-0.153337	0.0522038	0.00331112	0.0900513	kelch domain containing 3
ENSG00000126947	ARMCX1	33.3516	0.512065	0.174308	0.00330656	0.0900513	armadillo repeat containing, X-linked 1
ENSG00000206561	COLQ	41.5887	0.460452	0.156852	0.0033291	0.0900513	collagen-like tail subunit (single strand of homotrimer) of asymmetric acetylcholinesterase
ENSG00000251322	SHANK3	775.245	0.272865	0.0929679	0.00333503	0.0900513	SH3 and multiple ankyrin repeat domains 3
ENSG00000004478	FKBP4	864.933	-0.209427	0.0714227	0.00336549	0.0900881	FK506 binding protein 4, 59kDa
ENSG00000100918	REC8	52.2307	0.476907	0.16258	0.00335306	0.0900881	REC8 meiotic recombination protein
ENSG00000107262	BAG1	489.201	-0.191965	0.0654431	0.00335372	0.0900881	BCL2-associated athanogene
ENSG00000107816	LZTS2	243.592	0.29151	0.0994458	0.003375	0.0900881	leucine zipper, putative tumor suppressor 2
ENSG00000141524	TMC6	170.404	0.382074	0.130331	0.00337256	0.0900881	transmembrane channel-like 6
ENSG00000166337	TAF10	455.921	-0.166518	0.0567772	0.00335878	0.0900881	TAF10 RNA polymerase II, TATA box binding protein (TBP)-associated factor, 30kDa
ENSG00000254772	EEF1G	5688.97	-0.177228	0.0603983	0.00334269	0.0900881	eukaryotic translation elongation factor 1 gamma
ENSG00000147162	OGT	900.12	0.280316	0.0956461	0.00338127	0.0901085	O-linked N-acetylglucosamine (GlcNAc) transferase
ENSG00000109736	MFSD10	107.203	0.271816	0.0928377	0.00341297	0.0904111	major facilitator superfamily domain containing 10
ENSG00000120885	CLU	39872.1	-0.202443	0.0691325	0.00340779	0.0904111	clusterin
ENSG00000146243	IRAK1BP1	17.9073	0.514324	0.175735	0.00342584	0.0904111	interleukin-1 receptor-associated kinase 1 binding protein 1
ENSG00000198399	ITSN2	526.528	0.264713	0.0904266	0.0034183	0.0904111	intersectin 2
ENSG00000219626	FAM228B	20.1571	0.5556	0.189802	0.00341954	0.0904111	family with sequence similarity 228, member B
ENSG00000239665	RP11-295P9.3	84.0723	0.469395	0.160359	0.00342084	0.0904111	Uncharacterized protein
ENSG00000050767	COL23A1	10.0865	0.668061	0.228417	0.00344748	0.0906892	collagen, type XXIII, alpha 1
ENSG00000105383	CD33	34.4347	0.593405	0.203028	0.00346935	0.0911179	CD33 molecule
ENSG00000151067	CACNA1C	13.8894	0.759734	0.260222	0.00350524	0.0919128	calcium channel, voltage-dependent, L type, alpha 1C subunit
ENSG00000108821	COL1A1	517.831	0.387295	0.132887	0.00356287	0.09268	collagen, type I, alpha 1
ENSG00000167232	ZNF91	196.862	0.237259	0.0814046	0.00356192	0.09268	zinc finger protein 91
ENSG00000167363	FN3K	599.737	-0.224029	0.0768635	0.00356107	0.09268	fructosamine 3 kinase
ENSG00000182108	DEXI	325.739	-0.236126	0.0810072	0.00355823	0.09268	Dexi homolog (mouse)
ENSG00000067066	SP100	447.109	0.201484	0.0691502	0.00357158	0.0927588	SP100 nuclear antigen
ENSG00000189152	GRAPL	20.7851	0.72398	0.24853	0.00357917	0.0928085	GRB2-related adaptor protein-like
ENSG00000213983	AP1G2	266.231	0.350117	0.120215	0.00358637	0.0928479	adaptor-related protein complex 1, gamma 2 subunit
ENSG00000167702	KIFC2	286.742	0.361902	0.124305	0.00359818	0.0930062	kinesin family member C2
ENSG00000138030	KHK	4706.92	-0.230187	0.0790946	0.00361107	0.0930448	ketohexokinase (fructokinase)
ENSG00000187955	COL14A1	158.896	0.45986	0.157997	0.00360786	0.0930448	collagen, type XIV, alpha 1
ENSG00000169738	DCXR	14161.4	-0.258667	0.0889492	0.00363718	0.09357	dicarbonyl/L-xylulose reductase
ENSG00000110318	KIAA1377	8.72289	0.706474	0.243141	0.00366531	0.0938504	KIAA1377
ENSG00000128815	WDFY4	43.8685	0.562033	0.193366	0.00365406	0.0938504	WDFY family member 4
ENSG00000153303	FRMD1	5.4084	0.988299	0.340113	0.00366318	0.0938504	FERM domain containing 1
ENSG00000039139	DNAH5	8.31771	0.959803	0.330698	0.00370364	0.0939483	dynein, axonemal, heavy chain 5
ENSG00000078808	SDF4	1798.09	-0.161754	0.055713	0.00369195	0.0939483	stromal cell derived factor 4
ENSG00000087258	GNAO1	679.023	0.32565	0.112165	0.00369228	0.0939483	guanine nucleotide binding protein (G protein), alpha activating activity polypeptide O
ENSG00000115295	CLIP4	28.7393	0.494888	0.170415	0.00368407	0.0939483	CAP-GLY domain containing linker protein family, member 4
ENSG00000122515	ZMIZ2	499.147	0.281345	0.0969338	0.00370267	0.0939483	zinc finger, MIZ-type containing 2
ENSG00000162650	ATXN7L2	61.9436	0.504868	0.173825	0.00367883	0.0939483	ataxin 7-like 2
ENSG00000176222	ZNF404	14.9825	0.614121	0.211689	0.00371909	0.094194	zinc finger protein 404
ENSG00000135749	PCNXL2	19.587	0.636091	0.219375	0.00373691	0.0944986	pecanex-like 2 (Drosophila)
ENSG00000100003	SEC14L2	3353.07	-0.179042	0.0617613	0.00374438	0.094509	SEC14-like 2 (S. cerevisiae)
ENSG00000233493	TMEM238	540.695	-0.330424	0.114005	0.00375155	0.094509	transmembrane protein 238
ENSG00000023839	ABCC2	1641.83	0.265063	0.0915189	0.00377635	0.0949084	ATP-binding cassette, sub-family C (CFTR/MRP), member 2
ENSG00000178741	COX5A	597.946	-0.193682	0.0668853	0.00378266	0.094921	cytochrome c oxidase subunit Va
ENSG00000140682	TGFB1I1	50.0923	0.416499	0.143959	0.00381355	0.0953755	transforming growth factor beta 1 induced transcript 1
ENSG00000174851	YIF1A	922.394	-0.220432	0.0762004	0.00381829	0.0953755	Yip1 interacting factor homolog A (S. cerevisiae)
ENSG00000179010	MRFAP1	1947.95	-0.148453	0.0513042	0.00380863	0.0953755	Morf4 family associated protein 1
ENSG00000087448	KLHL42	148.6	0.23615	0.0817056	0.00384925	0.0954904	kelch-like family member 42
ENSG00000100842	EFS	19.2907	0.634811	0.219801	0.0038755	0.0954904	embryonal Fyn-associated substrate
ENSG00000131127	ZNF141	51.6606	0.481971	0.166821	0.00386296	0.0954904	zinc finger protein 141
ENSG00000135929	CYP27A1	6742.5	-0.207126	0.0717103	0.00387247	0.0954904	cytochrome P450, family 27, subfamily A, polypeptide 1
ENSG00000167670	CHAF1A	64.2065	0.349145	0.120748	0.00383376	0.0954904	chromatin assembly factor 1, subunit A (p150)
ENSG00000167815	PRDX2	1294.28	-0.198737	0.0688002	0.00386948	0.0954904	peroxiredoxin 2
ENSG00000213139	CRYGS	27.3305	0.499756	0.172955	0.00385844	0.0954904	crystallin, gamma S
ENSG00000185722	ANKFY1	403.402	0.293269	0.101721	0.00393829	0.0966004	ankyrin repeat and FYVE domain containing 1
ENSG00000204301	NOTCH4	287.826	0.420233	0.145822	0.00395393	0.0968386	notch 4
ENSG00000167895	TMC8	136.713	0.39589	0.137498	0.00398616	0.097482	transmembrane channel-like 8
ENSG00000198064	RP11-347C12.1	31.7223	0.616571	0.214201	0.00399609	0.0975786	Putative NPIP-like protein LOC613037
ENSG00000152672	CLEC4F	9.82785	0.762572	0.26501	0.00400808	0.0975798	C-type lectin domain family 4, member F
ENSG00000164062	APEH	695.058	-0.164833	0.057278	0.00400494	0.0975798	acylaminoacyl-peptide hydrolase
ENSG00000123179	EBPL	862.847	-0.237785	0.0826897	0.0040322	0.0980209	emopamil binding protein-like
ENSG00000126870	WDR60	152.771	0.360181	0.125405	0.00407702	0.0989632	WD repeat domain 60
ENSG00000108561	C1QBP	510.259	-0.205338	0.0715438	0.00410341	0.0994069	complement component 1, q subcomponent binding protein
ENSG00000173575	CHD2	968.347	0.253557	0.0883539	0.00410747	0.0994069	chromodomain helicase DNA binding protein 2
ENSG00000241935	HOGA1	615.155	-0.199925	0.0696852	0.00411814	0.0995175	4-hydroxy-2-oxoglutarate aldolase 1
ENSG00000003402	CFLAR	1210.56	0.167145	0.0583506	0.00417666	0.0998173	CASP8 and FADD-like apoptosis regulator
ENSG00000013583	HEBP1	873.489	-0.205876	0.0719089	0.0041964	0.0998173	heme binding protein 1
ENSG00000079931	MOXD1	8.66265	0.772273	0.269451	0.0041556	0.0998173	monooxygenase, DBH-like 1
ENSG00000105483	CARD8	238.554	0.263994	0.0921561	0.00417486	0.0998173	caspase recruitment domain family, member 8
ENSG00000125633	CCDC93	218.5	0.300545	0.10487	0.00415865	0.0998173	coiled-coil domain containing 93
ENSG00000130940	CASZ1	48.6477	0.469865	0.164074	0.00418671	0.0998173	castor zinc finger 1
ENSG00000162552	WNT4	11.8731	0.768359	0.268339	0.0041913	0.0998173	wingless-type MMTV integration site family, member 4
ENSG00000171729	TMEM51	26.9837	0.481423	0.168159	0.00419775	0.0998173	transmembrane protein 51
ENSG00000186469	GNG2	88.4238	0.51256	0.178911	0.00417162	0.0998173	guanine nucleotide binding protein (G protein), gamma 2
ENSG00000198563	DDX39B	1662.46	0.194769	0.0680055	0.00418299	0.0998173	DEAD (Asp-Glu-Ala-Asp) box polypeptide 39B
ENSG00000107863	ARHGAP21	329.79	0.277408	0.097007	0.00424075	0.0999658	Rho GTPase activating protein 21
ENSG00000140750	ARHGAP17	198.273	0.256762	0.0897723	0.00423435	0.0999658	Rho GTPase activating protein 17
ENSG00000184206	GOLGA6L4	57.3445	0.470503	0.164502	0.00423421	0.0999658	golgin A6 family-like 4
ENSG00000189362	TMEM194B	35.7404	0.456046	0.159385	0.00421932	0.0999658	transmembrane protein 194B
ENSG00000196705	ZNF431	14.5849	0.642475	0.224703	0.00424683	0.0999658	zinc finger protein 431
ENSG00000198844	ARHGEF15	77.4914	0.432539	0.151218	0.0042316	0.0999658	Rho guanine nucleotide exchange factor (GEF) 15
ENSG00000221978	CCNL2	1829.05	0.277944	0.0971843	0.00423678	0.0999658	cyclin L2

## Sheet: B-severe NAFLD
B - Severe NAFLD vs non severe NAFLD healthy liver differential expression
ENSEMBL ID	Gene symbol	Mean count	log2FoldChange	log2FoldChange Standard Error	pvalue	padj	description
ENSG00000008517	IL32	1530.29	1.35981	0.209112	7.88435e-11	1.22767e-06	interleukin 32
ENSG00000170421	KRT8	3040.3	0.551913	0.09254	2.46057e-09	1.91568e-05	keratin 8
ENSG00000123560	PLP1	17.6265	-2.14919	0.387612	2.94446e-08	9.16964e-05	proteolipid protein 1
ENSG00000184545	DUSP8	42.9513	1.74629	0.313802	2.62231e-08	9.16964e-05	dual specificity phosphatase 8
ENSG00000185338	SOCS1	19.5271	1.54663	0.276793	2.3015e-08	9.16964e-05	suppressor of cytokine signaling 1
ENSG00000108821	COL1A1	517.831	0.791146	0.157373	4.97688e-07	0.00109523	collagen, type I, alpha 1
ENSG00000187545	PRAMEF10	9.49847	2.55529	0.51069	5.62701e-07	0.00109523	PRAME family member 10
ENSG00000213886	UBD	135.073	1.27139	0.251573	4.33164e-07	0.00109523	ubiquitin D
ENSG00000198074	AKR1B10	48.9013	2.32702	0.472295	8.34794e-07	0.00144429	aldo-keto reductase family 1, member B10 (aldose reductase)
ENSG00000177138	FAM9B	17.3159	-1.58023	0.327856	1.43641e-06	0.00223663	family with sequence similarity 9, member B
ENSG00000042493	CAPG	44.9329	0.999122	0.208415	1.63567e-06	0.00231537	capping protein (actin filament), gelsolin-like
ENSG00000108679	LGALS3BP	1272.47	0.465623	0.0978563	1.95297e-06	0.00239525	lectin, galactoside-binding, soluble, 3 binding protein
ENSG00000123496	IL13RA2	36.3698	-1.18097	0.248445	1.99976e-06	0.00239525	interleukin 13 receptor, alpha 2
ENSG00000101412	E2F1	15.5054	1.32612	0.281134	2.39299e-06	0.00266151	E2F transcription factor 1
ENSG00000134769	DTNA	21.0276	1.35708	0.291169	3.14985e-06	0.00301755	dystrobrevin, alpha
ENSG00000161653	NAGS	526.107	-0.565471	0.121476	3.24005e-06	0.00301755	N-acetylglutamate synthase
ENSG00000169429	IL8	14.4204	1.88371	0.404964	3.29448e-06	0.00301755	interleukin 8
ENSG00000186787	SPIN2B	26.9176	0.875282	0.190432	4.30065e-06	0.00372031	spindlin family, member 2B
ENSG00000184557	SOCS3	94.8147	1.34562	0.296316	5.59447e-06	0.00458482	suppressor of cytokine signaling 3
ENSG00000130522	JUND	1429.65	0.663057	0.147557	7.00421e-06	0.00545313	jun D proto-oncogene
ENSG00000095970	TREM2	8.28419	1.66103	0.372415	8.1902e-06	0.00607284	triggering receptor expressed on myeloid cells 2
ENSG00000087085	ACHE	18.787	1.35656	0.305563	9.01459e-06	0.00610288	acetylcholinesterase (Yt blood group)
ENSG00000111057	KRT18	1879.62	0.42831	0.0964628	8.9895e-06	0.00610288	keratin 18
ENSG00000013364	MVP	505.343	0.435106	0.0991571	1.14375e-05	0.00739694	major vault protein
ENSG00000100427	MLC1	10.7389	1.23326	0.281576	1.18761e-05	0.00739694	megalencephalic leukoencephalopathy with subcortical cysts 1
ENSG00000135338	LCA5	15.516	-1.13176	0.259339	1.27696e-05	0.00751959	Leber congenital amaurosis 5
ENSG00000196177	ACADSB	5747.24	-0.376215	0.0862986	1.30389e-05	0.00751959	acyl-CoA dehydrogenase, short/branched chain
ENSG00000170190	SLC16A5	30.5229	-1.06651	0.249521	1.91791e-05	0.0106656	solute carrier family 16 (monocarboxylate transporter), member 5
ENSG00000023445	BIRC3	141.034	0.5938	0.140393	2.34141e-05	0.0112399	baculoviral IAP repeat containing 3
ENSG00000135697	BCMO1	9.00247	1.16269	0.274419	2.26609e-05	0.0112399	beta-carotene 15,15'-monooxygenase 1
ENSG00000136986	DERL1	728.775	0.309791	0.0731676	2.29578e-05	0.0112399	derlin 1
ENSG00000162772	ATF3	150.454	1.02835	0.24305	2.32623e-05	0.0112399	activating transcription factor 3
ENSG00000171747	LGALS4	536.218	0.906678	0.214563	2.3821e-05	0.0112399	lectin, galactoside-binding, soluble, 4
ENSG00000099284	H2AFY2	66.4893	0.625884	0.150604	3.24103e-05	0.0135608	H2A histone family, member Y2
ENSG00000128052	KDR	475.118	-0.734168	0.176697	3.25364e-05	0.0135608	kinase insert domain receptor (a type III receptor tyrosine kinase)
ENSG00000159289	GOLGA6A	79.7031	-1.08961	0.261504	3.09051e-05	0.0135608	golgin A6 family, member A
ENSG00000164815	ORC5	109.736	-0.496565	0.119112	3.06065e-05	0.0135608	origin recognition complex, subunit 5
ENSG00000186235	AC016757.3	5.63171	-1.52751	0.367982	3.30941e-05	0.0135608	Protein LOC151174
ENSG00000123342	MMP19	30.6997	1.32932	0.323334	3.93477e-05	0.0157098	matrix metallopeptidase 19
ENSG00000167065	DUSP18	19.2272	-0.975299	0.241245	5.28208e-05	0.0205618	dual specificity phosphatase 18
ENSG00000117983	MUC5B	47.8444	-1.54803	0.385408	5.90411e-05	0.0211562	mucin 5B, oligomeric mucus/gel-forming
ENSG00000129474	AJUBA	350.149	0.594329	0.147585	5.64854e-05	0.0211562	ajuba LIM protein
ENSG00000155066	PROM2	15.1536	-1.08686	0.271697	6.32764e-05	0.0211562	prominin 2
ENSG00000170323	FABP4	18.721	1.43519	0.358969	6.38585e-05	0.0211562	fatty acid binding protein 4, adipocyte
ENSG00000253159	PCDHGA12	30.527	1.40285	0.348774	5.76477e-05	0.0211562	protocadherin gamma subfamily A, 12
ENSG00000116661	FBXO2	252.832	0.567226	0.142396	6.79255e-05	0.0219845	F-box protein 2
ENSG00000174306	ZHX3	574.801	-0.321569	0.0808149	6.91823e-05	0.0219845	zinc fingers and homeoboxes 3
ENSG00000143164	DCAF6	949.441	-0.215699	0.0543584	7.24499e-05	0.0225624	DDB1 and CUL4 associated factor 6
ENSG00000087152	ATXN7L3	293.531	-0.337178	0.0856367	8.24008e-05	0.023644	ataxin 7-like 3
ENSG00000107736	CDH23	286.785	-0.74673	0.190082	8.54929e-05	0.023644	cadherin-related 23
ENSG00000113119	TMCO6	200.344	-0.498306	0.12619	7.85208e-05	0.023644	transmembrane and coiled-coil domains 6
ENSG00000117984	CTSD	7373.55	0.351799	0.0895626	8.56665e-05	0.023644	cathepsin D
ENSG00000124766	SOX4	114.344	0.561451	0.143027	8.65525e-05	0.023644	SRY (sex determining region Y)-box 4
ENSG00000163435	ELF3	201.277	0.645985	0.163807	8.02778e-05	0.023644	E74-like factor 3 (ets domain transcription factor, epithelial-specific )
ENSG00000189067	LITAF	726.917	0.377972	0.0960494	8.3132e-05	0.023644	lipopolysaccharide-induced TNF factor
ENSG00000004961	HCCS	106.172	0.499289	0.128564	0.000102923	0.0244835	holocytochrome c synthase
ENSG00000100065	CARD10	227.899	-0.41266	0.106212	0.000102225	0.0244835	caspase recruitment domain family, member 10
ENSG00000102109	PCSK1N	24.858	1.85833	0.477078	9.81054e-05	0.0244835	proprotein convertase subtilisin/kexin type 1 inhibitor
ENSG00000121897	LIAS	106.205	-0.613975	0.158131	0.000103308	0.0244835	lipoic acid synthetase
ENSG00000136891	TEX10	101.423	-0.554199	0.142632	0.000102109	0.0244835	testis expressed 10
ENSG00000138755	CXCL9	93.8626	1.09687	0.281679	9.8592e-05	0.0244835	chemokine (C-X-C motif) ligand 9
ENSG00000165494	PCF11	283.656	-0.431232	0.110532	9.56346e-05	0.0244835	PCF11 cleavage and polyadenylation factor subunit
ENSG00000171817	ZNF540	29.7572	-0.776063	0.199934	0.000103777	0.0244835	zinc finger protein 540
ENSG00000185883	ATP6V0C	746.385	0.32645	0.0839265	0.000100365	0.0244835	ATPase, H+ transporting, lysosomal 16kDa, V0 subunit c
ENSG00000126016	AMOT	60.0446	-0.71331	0.184052	0.000106363	0.024719	angiomotin
ENSG00000204084	INPP5B	277.195	-0.412893	0.107097	0.000115576	0.0264651	inositol polyphosphate-5-phosphatase, 75kDa
ENSG00000110092	CCND1	1004.69	0.415831	0.108121	0.000120083	0.0269237	cyclin D1
ENSG00000146006	LRRTM2	7.57414	-1.11107	0.289039	0.000121037	0.0269237	leucine rich repeat transmembrane neuronal 2
ENSG00000133805	AMPD3	27.8343	0.785146	0.20473	0.000125548	0.0271516	adenosine monophosphate deaminase 3
ENSG00000166793	YPEL4	10.1167	-1.0987	0.286266	0.000124021	0.0271516	yippee-like 4 (Drosophila)
ENSG00000119737	GPR75	31.8816	-0.926043	0.242055	0.000130374	0.027809	G protein-coupled receptor 75
ENSG00000183578	TNFAIP8L3	6.93117	1.09933	0.287937	0.000134556	0.0279356	tumor necrosis factor, alpha-induced protein 8-like 3
ENSG00000231925	TAPBP	1685.18	0.345021	0.0903177	0.000133408	0.0279356	TAP binding protein (tapasin)
ENSG00000183484	GPR132	12.4893	0.999319	0.261975	0.000136422	0.0279504	G protein-coupled receptor 132
ENSG00000008311	AASS	584.377	-0.644623	0.169608	0.000144303	0.0280408	aminoadipate-semialdehyde synthase
ENSG00000049540	ELN	234.941	-0.618197	0.163489	0.000156032	0.0280408	elastin
ENSG00000090339	ICAM1	192.974	0.567665	0.150351	0.000159626	0.0280408	intercellular adhesion molecule 1
ENSG00000109062	SLC9A3R1	1385.41	0.282066	0.0745872	0.000155762	0.0280408	solute carrier family 9, subfamily A (NHE3, cation proton antiporter 3), member 3 regulator 1
ENSG00000112394	SLC16A10	238.633	-0.466033	0.122316	0.000138932	0.0280408	solute carrier family 16 (aromatic amino acid transporter), member 10
ENSG00000118515	SGK1	520.831	0.636313	0.168027	0.000152493	0.0280408	serum/glucocorticoid regulated kinase 1
ENSG00000134339	SAA2	1219.72	1.32369	0.348404	0.000145102	0.0280408	serum amyloid A2
ENSG00000135605	TEC	33.479	-0.771188	0.203087	0.000146262	0.0280408	tec protein tyrosine kinase
ENSG00000155366	RHOC	639.561	0.27867	0.0735336	0.000150828	0.0280408	ras homolog family member C
ENSG00000159674	SPON2	621.845	0.395767	0.104847	0.000160203	0.0280408	spondin 2, extracellular matrix protein
ENSG00000175445	LPL	10.9822	1.55871	0.411592	0.000152461	0.0280408	lipoprotein lipase
ENSG00000206503	HLA-A	3830.96	0.399064	0.105724	0.000160275	0.0280408	major histocompatibility complex, class I, A
ENSG00000269113	TRABD2B	106.233	-0.730445	0.192141	0.000143765	0.0280408	TraB domain containing 2B
ENSG00000175785	PRIMA1	7.17408	-1.16518	0.309361	0.000165602	0.0286509	proline rich membrane anchor 1
ENSG00000101421	CHMP4B	428.486	0.301624	0.080398	0.000175687	0.0300617	charged multivesicular body protein 4B
ENSG00000025708	TYMP	1205.92	0.501585	0.134064	0.000183003	0.030327	thymidine phosphorylase
ENSG00000161055	SCGB3A1	18.1361	-1.56248	0.417851	0.00018452	0.030327	secretoglobin, family 3A, member 1
ENSG00000171119	NRTN	124.908	0.56635	0.151412	0.000183692	0.030327	neurturin
ENSG00000183087	GAS6	725.482	0.45008	0.120461	0.000186742	0.030327	growth arrest-specific 6
ENSG00000167165	UGT1A6	465.437	0.999603	0.267762	0.000189083	0.0303526	UDP glucuronosyltransferase 1 family, polypeptide A6
ENSG00000141873	SLC39A3	217.212	0.37126	0.0996831	0.000195779	0.0308689	solute carrier family 39 (zinc transporter), member 3
ENSG00000268863	AC135048.1	9.14156	1.26244	0.33902	0.000196264	0.0308689	Uncharacterized protein
ENSG00000168528	SERINC2	929.792	0.350357	0.0941529	0.000198315	0.0308796	serine incorporator 2
ENSG00000163644	PPM1K	306.509	-0.381999	0.102884	0.000204892	0.0315582	protein phosphatase, Mg2+/Mn2+ dependent, 1K
ENSG00000187720	THSD4	290.862	-0.419212	0.112975	0.000206726	0.0315582	thrombospondin, type I, domain containing 4
ENSG00000216490	IFI30	540.524	0.420424	0.113469	0.00021123	0.0319327	interferon, gamma-inducible protein 30
ENSG00000115129	TP53I3	82.1887	0.65488	0.177371	0.000222368	0.0320601	tumor protein p53 inducible protein 3
ENSG00000164938	TP53INP1	1206.69	0.350388	0.094804	0.000219088	0.0320601	tumor protein p53 inducible nuclear protein 1
ENSG00000171448	ZBTB26	32.8295	-0.658371	0.178077	0.000218064	0.0320601	zinc finger and BTB domain containing 26
ENSG00000173898	SPTBN2	992.78	-0.407659	0.110389	0.000221683	0.0320601	spectrin, beta, non-erythrocytic 2
ENSG00000177606	JUN	1025.43	0.793664	0.214413	0.000214277	0.0320601	jun proto-oncogene
ENSG00000063046	EIF4B	2815.68	-0.243322	0.0661621	0.000235377	0.0336243	eukaryotic translation initiation factor 4B
ENSG00000137033	IL33	213.588	-0.64441	0.175521	0.000241214	0.034145	interleukin 33
ENSG00000100410	PHF5A	110.372	0.380738	0.104137	0.000256068	0.0352853	PHD finger protein 5A
ENSG00000107186	MPDZ	1304.77	-0.341841	0.0934597	0.000254554	0.0352853	multiple PDZ domain protein
ENSG00000136546	SCN7A	17.0571	-1.14211	0.312344	0.000255618	0.0352853	sodium channel, voltage-gated, type VII, alpha subunit
ENSG00000135045	C9orf40	28.8814	0.599129	0.163976	0.000258423	0.0352974	chromosome 9 open reading frame 40
ENSG00000104951	IL4I1	15.2664	1.00848	0.276853	0.000269822	0.0359093	interleukin 4 induced 1
ENSG00000151327	FAM177A1	259.989	0.336594	0.0923582	0.000267977	0.0359093	family with sequence similarity 177, member A1
ENSG00000158714	SLAMF8	23.7487	0.996044	0.273344	0.000268511	0.0359093	SLAM family member 8
ENSG00000158710	TAGLN2	857.852	0.332606	0.0914653	0.000276461	0.0364811	transgelin 2
ENSG00000160460	SPTBN4	24.0516	-0.883397	0.243275	0.00028203	0.0369032	spectrin, beta, non-erythrocytic 4
ENSG00000143061	IGSF3	17.9341	0.824053	0.227417	0.000290602	0.0373964	immunoglobulin superfamily, member 3
ENSG00000143248	RGS5	418.596	-0.454276	0.125352	0.000290089	0.0373964	regulator of G-protein signaling 5
ENSG00000168772	CXXC4	48.4045	-0.633818	0.17512	0.000295369	0.0376982	CXXC finger protein 4
ENSG00000131781	FMO5	2180.89	-0.313161	0.0867749	0.000307517	0.0386157	flavin containing monooxygenase 5
ENSG00000165533	TTC8	85.4961	-0.516498	0.143104	0.000307091	0.0386157	tetratricopeptide repeat domain 8
ENSG00000128284	APOL3	505.697	0.551804	0.1531	0.000313097	0.0388805	apolipoprotein L, 3
ENSG00000254827	SLC22A18AS	25.529	0.825569	0.229136	0.00031462	0.0388805	solute carrier family 22 (organic cation transporter), member 18 antisense
ENSG00000153165	RGPD3	22.5187	-0.940457	0.261517	0.000322957	0.0392873	RANBP2-like and GRIP domain containing 3
ENSG00000170006	TMEM154	167.871	0.930261	0.258575	0.000321113	0.0392873	transmembrane protein 154
ENSG00000164002	EXO5	47.9333	-0.630052	0.176082	0.00034599	0.0417629	exonuclease 5
ENSG00000075624	ACTB	9934.83	0.261196	0.07304	0.000348796	0.0417777	actin, beta
ENSG00000174194	AGAP8	43.9978	-0.99588	0.278769	0.000353691	0.0420407	ArfGAP with GTPase domain, ankyrin repeat and PH domain 8
ENSG00000172757	CFL1	1556.67	0.258629	0.0724818	0.000359456	0.0420833	cofilin 1 (non-muscle)
ENSG00000064989	CALCRL	115.508	-0.810076	0.227579	0.000371514	0.0425356	calcitonin receptor-like
ENSG00000151687	ANKAR	17.5292	-0.903143	0.25349	0.000366874	0.0425356	ankyrin and armadillo repeat containing
ENSG00000234745	HLA-B	3902.96	0.406162	0.114088	0.000370745	0.0425356	major histocompatibility complex, class I, B
ENSG00000179862	CITED4	316.133	0.45524	0.128037	0.000377217	0.0428733	Cbp/p300-interacting transactivator, with Glu/Asp-rich carboxy-terminal domain, 4
ENSG00000144504	ANKMY1	96.8304	-0.553368	0.156179	0.000395358	0.0446096	ankyrin repeat and MYND domain containing 1
ENSG00000165185	KIAA1958	139.67	-0.396944	0.112222	0.000404482	0.0453107	KIAA1958
ENSG00000105369	CD79A	16.4607	-1.03481	0.293138	0.000415401	0.0455507	CD79a molecule, immunoglobulin-associated alpha
ENSG00000162415	ZSWIM5	19.0896	-0.920799	0.260795	0.000414412	0.0455507	zinc finger, SWIM-type containing 5
ENSG00000255152	MSH5-SAPCD1	9.89321	-1.28243	0.364866	0.000440109	0.0475898	MSH5-SAPCD1 readthrough (NMD candidate)
ENSG00000006327	TNFRSF12A	63.0838	0.855117	0.243463	0.000444238	0.0477051	tumor necrosis factor receptor superfamily, member 12A
ENSG00000074410	CA12	12.0387	1.39782	0.398203	0.000447575	0.0477342	carbonic anhydrase XII
ENSG00000112473	SLC39A7	897.084	0.304336	0.0868314	0.000456761	0.0483825	solute carrier family 39 (zinc transporter), member 7
ENSG00000161048	NAPEPLD	224.119	-0.389697	0.111322	0.000464149	0.0487742	N-acyl phosphatidylethanolamine phospholipase D
ENSG00000171132	PRKCE	178.916	0.680102	0.194361	0.000466724	0.0487742	protein kinase C, epsilon
ENSG00000107957	SH3PXD2A	1138.57	-0.543374	0.155744	0.000485016	0.0493606	SH3 and PX domains 2A
ENSG00000121895	TMEM156	13.6901	-0.935147	0.267702	0.000477197	0.0493606	transmembrane protein 156
ENSG00000141198	TOM1L1	428.716	-0.328006	0.09395	0.000480712	0.0493606	target of myb1 (chicken)-like 1
ENSG00000166575	TMEM135	290.195	0.333651	0.0955958	0.000482607	0.0493606	transmembrane protein 135
ENSG00000161513	FDXR	166.576	0.422294	0.121148	0.000490722	0.049617	ferredoxin reductase
ENSG00000182718	ANXA2	471.766	0.436806	0.125518	0.000501349	0.0503645	annexin A2
ENSG00000170382	LRRN2	23.4839	-0.879271	0.253863	0.000533072	0.0532081	leucine rich repeat neuronal 2
ENSG00000164687	FABP5	37.399	0.800014	0.23136	0.000544444	0.053997	fatty acid binding protein 5 (psoriasis-associated)
ENSG00000164061	BSN	71.2794	-0.757339	0.219403	0.00055681	0.0542801	bassoon presynaptic cytomatrix protein
ENSG00000165280	VCP	1363.59	0.237647	0.0687903	0.000551002	0.0542801	valosin containing protein
ENSG00000188938	FAM120AOS	186.109	-0.482879	0.139909	0.000557756	0.0542801	family with sequence similarity 120A opposite strand
ENSG00000013275	PSMC4	424.271	0.247514	0.0719798	0.000584612	0.0561913	proteasome (prosome, macropain) 26S subunit, ATPase, 4
ENSG00000198932	GPRASP1	64.402	-0.753668	0.219074	0.000581175	0.0561913	G protein-coupled receptor associated sorting protein 1
ENSG00000177042	TMEM80	115.853	-0.484046	0.140992	0.000596611	0.0566878	transmembrane protein 80
ENSG00000196693	ZNF33B	236.684	-0.332168	0.0968147	0.000601437	0.0567574	zinc finger protein 33B
ENSG00000132677	RHBG	216.028	-0.676339	0.19753	0.000617109	0.0575389	Rh family, B glycoprotein (gene/pseudogene)
ENSG00000222009	BTBD19	64.642	0.665488	0.194341	0.0006163	0.0575389	BTB (POZ) domain containing 19
ENSG00000069424	KCNAB2	99.2606	0.628321	0.183826	0.000630774	0.0581171	potassium voltage-gated channel, shaker-related subfamily, beta member 2
ENSG00000159720	ATP6V0D1	399.734	0.294675	0.0862022	0.000629878	0.0581171	ATPase, H+ transporting, lysosomal 38kDa, V0 subunit d1
ENSG00000117228	GBP1	326.273	0.381197	0.111597	0.000635895	0.0582443	guanylate binding protein 1, interferon-inducible
ENSG00000130513	GDF15	147.486	0.909751	0.266682	0.000646379	0.0585161	growth differentiation factor 15
ENSG00000204323	SMIM5	13.9484	-0.955672	0.280139	0.000646247	0.0585161	small integral membrane protein 5
ENSG00000126106	TMEM53	335.475	0.330774	0.0970725	0.000655627	0.0590102	transmembrane protein 53
ENSG00000105877	DNAH11	8.46364	-1.16439	0.342015	0.000662865	0.0593188	dynein, axonemal, heavy chain 11
ENSG00000101160	CTSZ	3818.29	0.264231	0.0778664	0.000690346	0.0608881	cathepsin Z
ENSG00000131981	LGALS3	87.5625	0.576663	0.169973	0.000692132	0.0608881	lectin, galactoside-binding, soluble, 3
ENSG00000172379	ARNT2	21.1676	-0.787036	0.231899	0.000689132	0.0608881	aryl-hydrocarbon receptor nuclear translocator 2
ENSG00000118777	ABCG2	306.542	-0.392003	0.115688	0.00070288	0.0610093	ATP-binding cassette, sub-family G (WHITE), member 2
ENSG00000120915	EPHX2	2471.89	-0.220077	0.0649668	0.000705265	0.0610093	epoxide hydrolase 2, cytoplasmic
ENSG00000177697	CD151	1175.73	0.34754	0.102551	0.000701623	0.0610093	CD151 molecule (Raph blood group)
ENSG00000010292	NCAPD2	122.3	-0.382582	0.113536	0.000752534	0.0643474	non-SMC condensin I complex, subunit D2
ENSG00000130635	COL5A1	181.663	0.65364	0.193974	0.000752405	0.0643474	collagen, type V, alpha 1
ENSG00000189058	APOD	8.49121	-1.87883	0.557794	0.000756251	0.0643474	apolipoprotein D
ENSG00000262576	PCDHGA4	9.7199	-1.201	0.35686	0.000764132	0.0646647	protocadherin gamma subfamily A, 4
ENSG00000068615	REEP1	24.9843	-0.894036	0.266077	0.000779231	0.0649339	receptor accessory protein 1
ENSG00000105639	JAK3	55.6444	0.630794	0.187744	0.000779824	0.0649339	Janus kinase 3
ENSG00000123159	GIPC1	306.796	0.316925	0.0942447	0.000771578	0.0649339	GIPC PDZ domain containing family, member 1
ENSG00000124762	CDKN1A	354.166	0.490192	0.14608	0.000791793	0.0652955	cyclin-dependent kinase inhibitor 1A (p21, Cip1)
ENSG00000155463	OXA1L	702.422	-0.278682	0.0830945	0.000797125	0.0652955	oxidase (cytochrome c) assembly 1-like
ENSG00000175283	DOLK	93.5146	0.482581	0.143948	0.000800941	0.0652955	dolichol kinase
ENSG00000242265	PEG10	181.404	0.770848	0.229785	0.000794647	0.0652955	paternally expressed 10
ENSG00000136235	GPNMB	193.936	0.686479	0.204878	0.000806182	0.0653805	glycoprotein (transmembrane) nmb
ENSG00000164309	CMYA5	89.1158	-0.716824	0.214168	0.000816874	0.0659044	cardiomyopathy associated 5
ENSG00000247596	TWF2	257.048	0.365619	0.109354	0.000827457	0.0664141	twinfilin actin-binding protein 2
ENSG00000187688	TRPV2	39.0745	0.652306	0.195498	0.000847956	0.0677104	transient receptor potential cation channel, subfamily V, member 2
ENSG00000148795	CYP17A1	35.3261	1.08151	0.3254	0.000888561	0.0705907	cytochrome P450, family 17, subfamily A, polypeptide 1
ENSG00000109625	CPZ	14.1928	0.941379	0.283466	0.000897099	0.0709073	carboxypeptidase Z
ENSG00000133026	MYH10	478.859	-0.32454	0.0977994	0.00090527	0.0711917	myosin, heavy chain 10, non-muscle
ENSG00000005893	LAMP2	1680	0.246057	0.0743607	0.000936403	0.0716163	lysosomal-associated membrane protein 2
ENSG00000083857	FAT1	260.645	0.589268	0.177745	0.000915595	0.0716163	FAT atypical cadherin 1
ENSG00000100401	RANGAP1	529.575	0.242089	0.0731737	0.000938265	0.0716163	Ran GTPase activating protein 1
ENSG00000136146	MED4	179.037	0.396313	0.119643	0.000924784	0.0716163	mediator complex subunit 4
ENSG00000143862	ARL8A	309.277	0.290911	0.0878948	0.000933751	0.0716163	ADP-ribosylation factor-like 8A
ENSG00000169245	CXCL10	41.3336	0.932994	0.281667	0.000924993	0.0716163	chemokine (C-X-C motif) ligand 10
ENSG00000172497	ACOT12	842.631	0.371728	0.112454	0.00094773	0.0716364	acyl-CoA thioesterase 12
ENSG00000198270	TMEM116	67.4444	-0.556702	0.168366	0.000944663	0.0716364	transmembrane protein 116
ENSG00000130713	EXOSC2	129.334	-0.332656	0.100684	0.000953286	0.0717083	exosome component 2
ENSG00000189184	PCDH18	37.7621	-0.805135	0.243831	0.000959915	0.0718598	protocadherin 18
ENSG00000175161	CADM2	13.1579	-0.951317	0.288385	0.000971067	0.0723468	cell adhesion molecule 2
ENSG00000118246	FASTKD2	174.202	-0.422153	0.128414	0.00101104	0.0725482	FAST kinase domains 2
ENSG00000124145	SDC4	1912.62	0.341384	0.103733	0.000998359	0.0725482	syndecan 4
ENSG00000128805	ARHGAP22	11.8208	1.02483	0.311396	0.000998042	0.0725482	Rho GTPase activating protein 22
ENSG00000180938	ZNF572	13.9595	-0.731662	0.222476	0.00100644	0.0725482	zinc finger protein 572
ENSG00000189159	HN1	87.9374	0.456622	0.138705	0.000994656	0.0725482	hematological and neurological expressed 1
ENSG00000206150	RNASE13	6.31915	-0.977926	0.297315	0.00100477	0.0725482	ribonuclease, RNase A family, 13 (non-active)
ENSG00000243943	ZNF512	104.202	-0.398748	0.121207	0.00100255	0.0725482	zinc finger protein 512
ENSG00000110448	CD5	12.919	0.95494	0.291794	0.00106545	0.0757542	CD5 molecule
ENSG00000123240	OPTN	737.108	0.28318	0.0866585	0.00108398	0.0764564	optineurin
ENSG00000144488	ESPNL	44.6799	-0.829175	0.253767	0.00108515	0.0764564	espin-like
ENSG00000167968	DNASE1L2	8.35168	-1.07763	0.329994	0.00109237	0.0766186	deoxyribonuclease I-like 2
ENSG00000198910	L1CAM	16.2887	-0.857409	0.262885	0.00110811	0.0770284	L1 cell adhesion molecule
ENSG00000247626	MARS2	48.6906	0.483465	0.148213	0.0011064	0.0770284	methionyl-tRNA synthetase 2, mitochondrial
ENSG00000063587	ZNF275	357.062	-0.324541	0.0996282	0.0011239	0.0770935	zinc finger protein 275
ENSG00000125650	PSPN	31.1328	0.633057	0.194208	0.00111535	0.0770935	persephin
ENSG00000198945	L3MBTL3	79.8642	-0.679719	0.208628	0.00112185	0.0770935	l(3)mbt-like 3 (Drosophila)
ENSG00000006075	CCL3	34.7186	0.905923	0.278581	0.00114627	0.0782833	chemokine (C-C motif) ligand 3
ENSG00000147872	PLIN2	3052.03	0.402041	0.12383	0.00116742	0.0793792	perilipin 2
ENSG00000117410	ATP6V0B	671.955	0.278125	0.085737	0.00117895	0.0798146	ATPase, H+ transporting, lysosomal 21kDa, V0 subunit b
ENSG00000133985	TTC9	30.1749	0.844577	0.261058	0.00121551	0.0799147	tetratricopeptide repeat domain 9
ENSG00000156858	PRR14	184.433	0.331631	0.102513	0.00121635	0.0799147	proline rich 14
ENSG00000158050	DUSP2	15.0911	1.00308	0.309514	0.00119191	0.0799147	dual specificity phosphatase 2
ENSG00000162706	CADM3	9.88858	-1.0943	0.33798	0.00120468	0.0799147	cell adhesion molecule 3
ENSG00000175106	TVP23C	18.1213	-0.887085	0.273811	0.00119624	0.0799147	trans-golgi network vesicle protein 23 homolog C (S. cerevisiae)
ENSG00000176473	WDR25	58.805	0.502217	0.155156	0.00120854	0.0799147	WD repeat domain 25
ENSG00000101405	OXT	82.7787	0.846989	0.261981	0.0012249	0.0801386	oxytocin/neurophysin I prepropeptide
ENSG00000183060	LYSMD4	48.752	0.644199	0.199338	0.00123062	0.0801755	LysM, putative peptidoglycan-binding, domain containing 4
ENSG00000163704	PRRT3	17.5495	0.731779	0.226611	0.00124126	0.080198	proline-rich transmembrane protein 3
ENSG00000187260	WDR86	23.383	-0.93105	0.288223	0.00123658	0.080198	WD repeat domain 86
ENSG00000128298	BAIAP2L2	14.2573	0.797254	0.247019	0.00124874	0.0803473	BAI1-associated protein 2-like 2
ENSG00000100227	POLDIP3	392.841	-0.260368	0.0808044	0.0012721	0.0815136	polymerase (DNA-directed), delta interacting protein 3
ENSG00000214193	SH3D21	11.5813	0.754417	0.234254	0.00127965	0.0816616	SH3 domain containing 21
ENSG00000156384	SFR1	18.5742	-0.733233	0.227896	0.00129355	0.0821216	SWI5-dependent recombination repair 1
ENSG00000250510	GPR162	47.8301	-0.738764	0.229676	0.00129741	0.0821216	G protein-coupled receptor 162
ENSG00000103316	CRYM	93.2564	0.476097	0.148105	0.00130626	0.0823475	crystallin, mu
ENSG00000007520	TSR3	459.537	0.358481	0.111625	0.00132053	0.0829015	TSR3, 20S rRNA accumulation, homolog (S. cerevisiae)
ENSG00000074935	TUBE1	391.372	-0.33781	0.105338	0.00134167	0.0829015	tubulin, epsilon 1
ENSG00000133313	CNDP2	1808.86	0.170626	0.0531586	0.00132846	0.0829015	CNDP dipeptidase 2 (metallopeptidase M20 family)
ENSG00000159423	ALDH4A1	4717.8	0.232575	0.0725086	0.00133867	0.0829015	aldehyde dehydrogenase 4 family, member A1
ENSG00000189227	C15orf61	59.3097	0.490427	0.152859	0.00133496	0.0829015	chromosome 15 open reading frame 61
ENSG00000169508	GPR183	16.918	0.835499	0.260815	0.00135807	0.083583	G protein-coupled receptor 183
ENSG00000101290	CDS2	415.403	-0.299758	0.0936332	0.00136759	0.0836886	CDP-diacylglycerol synthase (phosphatidate cytidylyltransferase) 2
ENSG00000128342	LIF	6.54205	1.03986	0.325104	0.00138128	0.0836886	leukemia inhibitory factor
ENSG00000162897	FCAMR	46.455	0.852526	0.266355	0.00137084	0.0836886	Fc receptor, IgA, IgM, high affinity
ENSG00000165915	SLC39A13	171.773	0.366576	0.114585	0.00137828	0.0836886	solute carrier family 39 (zinc transporter), member 13
ENSG00000101868	POLA1	46.8527	-0.577443	0.180712	0.00139646	0.0839766	polymerase (DNA directed), alpha 1, catalytic subunit
ENSG00000132837	DMGDH	2446.84	-0.266775	0.0834896	0.00139682	0.0839766	dimethylglycine dehydrogenase
ENSG00000138079	SLC3A1	221.997	-0.94617	0.296637	0.00142444	0.0853076	solute carrier family 3 (amino acid transporter heavy chain), member 1
ENSG00000134014	ELP3	212.649	-0.277682	0.0871786	0.00144652	0.0853174	elongator acetyltransferase complex subunit 3
ENSG00000161011	SQSTM1	3091.29	0.21556	0.0676647	0.00144401	0.0853174	sequestosome 1
ENSG00000176153	GPX2	497.691	0.778103	0.244251	0.00144419	0.0853174	glutathione peroxidase 2 (gastrointestinal)
ENSG00000185262	UBALD2	167.529	0.399353	0.12531	0.00143793	0.0853174	UBA-like domain containing 2
ENSG00000164742	ADCY1	2015.49	-0.281463	0.0884096	0.00145445	0.0853377	adenylate cyclase 1 (brain)
ENSG00000179397	C1orf101	8.43003	-0.954261	0.299804	0.00145783	0.0853377	chromosome 1 open reading frame 101
ENSG00000101294	HM13	655.347	0.263076	0.0828177	0.00149031	0.0854167	histocompatibility (minor) 13
ENSG00000128694	OSGEPL1	66.5488	-0.542861	0.170867	0.00148763	0.0854167	O-sialoglycoprotein endopeptidase-like 1
ENSG00000165841	CYP2C19	785.324	-0.677968	0.213266	0.00147796	0.0854167	cytochrome P450, family 2, subfamily C, polypeptide 19
ENSG00000167291	TBC1D16	329.986	-0.3931	0.123763	0.00149209	0.0854167	TBC1 domain family, member 16
ENSG00000182197	EXT1	405.151	0.32549	0.102386	0.00147754	0.0854167	exostosin glycosyltransferase 1
ENSG00000197982	C1orf122	325.689	0.378322	0.118976	0.00147369	0.0854167	chromosome 1 open reading frame 122
ENSG00000078124	ACER3	100.598	0.396969	0.125139	0.0015128	0.0862851	alkaline ceramidase 3
ENSG00000101938	CHRDL1	12.6597	-1.26138	0.397774	0.00151868	0.0863042	chordin-like 1
ENSG00000103479	RBL2	1089.16	-0.312264	0.0986079	0.00154164	0.0872906	retinoblastoma-like 2 (p130)
ENSG00000063438	AHRR	10.828	-1.04681	0.330832	0.0015552	0.0876969	aryl-hydrocarbon receptor repressor
ENSG00000181656	GPR88	94.1101	-0.978142	0.309219	0.00156008	0.0876969	G protein-coupled receptor 88
ENSG00000114374	USP9Y	30.1238	2.29015	0.724805	0.00157948	0.0884619	ubiquitin specific peptidase 9, Y-linked
ENSG00000162998	FRZB	36.4162	-0.822373	0.260356	0.00158505	0.0884619	frizzled-related protein
ENSG00000101443	WFDC2	5.41079	1.40795	0.446548	0.00161622	0.0895593	WAP four-disulfide core domain 2
ENSG00000111254	AKAP3	14.8914	-0.911115	0.288882	0.00161085	0.0895593	A kinase (PRKA) anchor protein 3
ENSG00000104972	LILRB1	75.8547	0.61914	0.196625	0.00163916	0.0901784	leukocyte immunoglobulin-like receptor, subfamily B (with TM and ITIM domains), member 1
ENSG00000131188	PRR7	11.3771	0.803695	0.255482	0.00165635	0.0901784	proline rich 7 (synaptic)
ENSG00000148719	DNAJB12	338.224	0.212645	0.0675611	0.001647	0.0901784	DnaJ (Hsp40) homolog, subfamily B, member 12
ENSG00000215472	RPL17-C18orf32	19.5572	1.56785	0.498321	0.00165366	0.0901784	RPL17-C18orf32 readthrough
ENSG00000155592	ZKSCAN2	57.746	-0.55774	0.177401	0.00166687	0.0904352	zinc finger with KRAB and SCAN domains 2
ENSG00000092068	SLC7A8	104.196	-0.649917	0.206798	0.00167357	0.0904832	solute carrier family 7 (amino acid transporter light chain, L system), member 8
ENSG00000070371	CLTCL1	74.9065	-0.476109	0.151565	0.00168211	0.09055	clathrin, heavy chain-like 1
ENSG00000186141	POLR3C	63.841	0.427922	0.136258	0.00168644	0.09055	polymerase (RNA) III (DNA directed) polypeptide C (62kD)
ENSG00000085063	CD59	1148.05	0.217804	0.0693815	0.00169395	0.0906409	CD59 molecule, complement regulatory protein
ENSG00000189320	FAM180A	38.2884	-0.733975	0.234144	0.00172018	0.091729	family with sequence similarity 180, member A
ENSG00000125347	IRF1	264.938	0.361659	0.115592	0.00175555	0.0929787	interferon regulatory factor 1
ENSG00000163913	IFT122	202.653	-0.302011	0.0965253	0.00175503	0.0929787	intraflagellar transport 122 homolog (Chlamydomonas)
ENSG00000145050	MANF	403.626	0.526147	0.168279	0.00176822	0.0930168	mesencephalic astrocyte-derived neurotrophic factor
ENSG00000160213	CSTB	495.636	0.282514	0.0903542	0.00176755	0.0930168	cystatin B (stefin B)
ENSG00000131381	ZFYVE20	254.094	-0.322032	0.103117	0.0017903	0.093861	zinc finger, FYVE domain containing 20
ENSG00000179886	TIGD5	53.8127	0.570784	0.182865	0.0018003	0.0940685	tigger transposable element derived 5
ENSG00000070404	FSTL3	132.316	0.48343	0.155065	0.00182336	0.0946221	follistatin-like 3 (secreted glycoprotein)
ENSG00000119711	ALDH6A1	5280.34	-0.275479	0.0883414	0.00181871	0.0946221	aldehyde dehydrogenase 6 family, member A1
ENSG00000157933	SKI	511.113	-0.294415	0.0944648	0.00182912	0.0946221	v-ski avian sarcoma viral oncogene homolog
ENSG00000135297	MTO1	268.002	-0.308805	0.099135	0.0018395	0.0947152	mitochondrial tRNA translation optimization 1
ENSG00000171161	ZNF672	250.33	0.247406	0.0794388	0.00184309	0.0947152	zinc finger protein 672
ENSG00000108001	EBF3	8.68572	-1.14075	0.366559	0.00185798	0.0951667	early B-cell factor 3
ENSG00000126247	CAPNS1	682.523	0.22682	0.0729255	0.00186897	0.0954153	calpain, small subunit 1
ENSG00000198690	FAN1	241.15	-0.415741	0.13371	0.00187542	0.0954319	FANCD2/FANCI-associated nuclease 1
ENSG00000107854	TNKS2	365.122	-0.255369	0.0822075	0.00189386	0.0960561	tankyrase, TRF1-interacting ankyrin-related ADP-ribose polymerase 2
ENSG00000090432	MUL1	193.956	0.38755	0.125298	0.00198133	0.0967936	mitochondrial E3 ubiquitin protein ligase 1
ENSG00000108231	LGI1	20.0732	-0.958844	0.309494	0.00194763	0.0967936	leucine-rich, glioma inactivated 1
ENSG00000114209	PDCD10	110.752	0.450503	0.145497	0.00195946	0.0967936	programmed cell death 10
ENSG00000115946	PNO1	65.0829	0.430227	0.13893	0.0019568	0.0967936	partner of NOB1 homolog (S. cerevisiae)
ENSG00000138722	MMRN1	65.8359	-0.810482	0.26135	0.00192782	0.0967936	multimerin 1
ENSG00000158480	SPATA2	56.5062	0.449181	0.145266	0.00198724	0.0967936	spermatogenesis associated 2
ENSG00000162813	BPNT1	212.065	0.38502	0.124387	0.00196586	0.0967936	3'(2'), 5'-bisphosphate nucleotidase 1
ENSG00000163879	DNALI1	109.092	-0.452423	0.146037	0.00194824	0.0967936	dynein, axonemal, light intermediate chain 1
ENSG00000166845	C18orf54	7.19082	-0.979995	0.316794	0.00197826	0.0967936	chromosome 18 open reading frame 54
ENSG00000172728	FUT10	34.0282	-0.734896	0.237285	0.0019542	0.0967936	fucosyltransferase 10 (alpha (1,3) fucosyltransferase)
ENSG00000173264	GPR137	182.346	0.354554	0.114674	0.00198921	0.0967936	G protein-coupled receptor 137
ENSG00000174744	BRMS1	135.715	0.33533	0.108123	0.00192627	0.0967936	breast cancer metastasis suppressor 1
ENSG00000246705	H2AFJ	479.126	0.36038	0.116348	0.00195202	0.0967936	H2A histone family, member J
ENSG00000116678	LEPR	1216	-0.508515	0.164621	0.00200834	0.0969785	leptin receptor
ENSG00000129071	MBD4	198.52	-0.329752	0.106743	0.00200684	0.0969785	methyl-CpG binding domain protein 4
ENSG00000163739	CXCL1	12.9081	1.06174	0.343772	0.00201169	0.0969785	chemokine (C-X-C motif) ligand 1 (melanoma growth stimulating activity, alpha)
ENSG00000100490	CDKL1	21.0262	-0.796942	0.258225	0.00202713	0.0973557	cyclin-dependent kinase-like 1 (CDC2-related kinase)
ENSG00000197696	NMB	11.2357	0.86158	0.279234	0.00203202	0.0973557	neuromedin B
ENSG00000121807	CCR2	18.3843	-0.700166	0.227269	0.00206462	0.0985348	chemokine (C-C motif) receptor 2
ENSG00000132881	RSG1	38.1701	-0.630317	0.20468	0.00207327	0.0985348	REM2 and RAB-like small GTPase 1
ENSG00000165912	PACSIN3	426.538	-0.386058	0.12541	0.00208146	0.0985348	protein kinase C and casein kinase substrate in neurons 3
ENSG00000183309	ZNF623	69.1155	-0.566207	0.183936	0.00208194	0.0985348	zinc finger protein 623
ENSG00000219200	RNASEK	909.555	0.270473	0.0878951	0.00208938	0.0985871	ribonuclease, RNase K
ENSG00000171885	AQP4	26.3988	0.831581	0.270347	0.00209815	0.0987018	aquaporin 4

## Sheet: C-sev. NAFLD-I148M non carriers
C - Severe NAFLD vs non severe NAFLD healthy liver in PNPLA3 I148M non carriers
ENSEMBL ID	Gene symbol	Mean count	log2FoldChange	log2FoldChange Standard Error	pvalue	padj	description
ENSG00000087085	ACHE	16.1238	2.31676	0.490252	2.29372e-06	0.0140473	acetylcholinesterase (Yt blood group)
ENSG00000150681	RGS18	24.0416	-2.1936	0.470458	3.12109e-06	0.0140473	regulator of G-protein signaling 18
ENSG00000185112	FAM43A	42.0067	-1.43455	0.299246	1.63589e-06	0.0140473	family with sequence similarity 43, member A
ENSG00000223953	C1QTNF5	102.376	-1.54247	0.333827	3.82707e-06	0.0140473	C1q and tumor necrosis factor related protein 5
ENSG00000164002	EXO5	48.1404	-1.38039	0.308848	7.84039e-06	0.0230225	exonuclease 5
ENSG00000008517	IL32	1368.26	1.45271	0.348231	3.02363e-05	0.0268076	interleukin 32
ENSG00000066379	ZNRD1	79.5006	-0.814879	0.196169	3.26764e-05	0.0268076	zinc ribbon domain containing 1
ENSG00000108821	COL1A1	421.662	1.00538	0.238267	2.44791e-05	0.0268076	collagen, type I, alpha 1
ENSG00000143110	C1orf162	62.1977	1.20095	0.285088	2.52504e-05	0.0268076	chromosome 1 open reading frame 162
ENSG00000159289	GOLGA6A	71.9304	-1.6967	0.399977	2.21549e-05	0.0268076	golgin A6 family, member A
ENSG00000168070	C11orf85	5.21866	-2.62594	0.603607	1.35879e-05	0.0268076	chromosome 11 open reading frame 85
ENSG00000168502	SOGA2	33.2217	1.02086	0.240958	2.26849e-05	0.0268076	SOGA family member 2
ENSG00000169429	IL8	10.5244	2.50084	0.577198	1.47281e-05	0.0268076	interleukin 8
ENSG00000173065	FAM222B	68.7819	0.90725	0.216465	2.77469e-05	0.0268076	family with sequence similarity 222, member B
ENSG00000174951	FUT1	18.4698	2.33443	0.560217	3.08621e-05	0.0268076	fucosyltransferase 1 (galactoside 2-alpha-L-fucosyltransferase, H blood group)
ENSG00000181315	ZNF322	52.0203	-1.01556	0.245288	3.46918e-05	0.0268076	zinc finger protein 322
ENSG00000184545	DUSP8	29.6773	1.78585	0.428453	3.07109e-05	0.0268076	dual specificity phosphatase 8
ENSG00000205464	ATP6AP1L	31.4105	-1.18075	0.284725	3.36876e-05	0.0268076	ATPase, H+ transporting, lysosomal accessory protein 1-like
ENSG00000220201	ZGLP1	29.9265	1.41374	0.332823	2.15947e-05	0.0268076	zinc finger, GATA-like protein 1
ENSG00000221968	FADS3	171.839	0.645497	0.156574	3.74572e-05	0.0274974	fatty acid desaturase 3
ENSG00000186212	SOWAHB	247.148	-0.902782	0.220325	4.17642e-05	0.0291991	sosondowah ankyrin repeat domain family member B
ENSG00000167065	DUSP18	15.9894	-1.44705	0.356617	4.95547e-05	0.0316331	dual specificity phosphatase 18
ENSG00000197646	PDCD1LG2	17.4286	-1.52146	0.374324	4.81234e-05	0.0316331	programmed cell death 1 ligand 2
ENSG00000143248	RGS5	377.484	-0.8916	0.221362	5.63021e-05	0.0344428	regulator of G-protein signaling 5
ENSG00000163762	TM4SF18	47.414	-1.69851	0.424129	6.20961e-05	0.0364678	transmembrane 4 L six family member 18
ENSG00000073464	CLCN4	94.2428	-0.963326	0.24359	7.66302e-05	0.038796	chloride channel, voltage-sensitive 4
ENSG00000149090	PAMR1	99.6427	-1.29004	0.324776	7.12436e-05	0.038796	peptidase domain containing associated with muscle regeneration 1
ENSG00000153822	KCNJ16	13.0622	1.80513	0.455084	7.29064e-05	0.038796	potassium inwardly-rectifying channel, subfamily J, member 16
ENSG00000161682	FAM171A2	11.3509	-2.02243	0.511056	7.5781e-05	0.038796	family with sequence similarity 171, member A2
ENSG00000007129	CEACAM21	9.97967	-2.37777	0.604343	8.3382e-05	0.0406692	carcinoembryonic antigen-related cell adhesion molecule 21
ENSG00000121895	TMEM156	13.2758	-2.12379	0.541817	8.86402e-05	0.0406692	transmembrane protein 156
ENSG00000198863	RUNDC1	92.9421	-0.606569	0.154462	8.60199e-05	0.0406692	RUN domain containing 1
ENSG00000151967	SCHIP1	14.1168	1.80526	0.463413	9.7965e-05	0.0435855	schwannomin interacting protein 1
ENSG00000121897	LIAS	107.433	-0.94569	0.243343	0.000101805	0.0439618	lipoic acid synthetase
ENSG00000068615	REEP1	23.0998	-1.79723	0.472189	0.000141134	0.0467827	receptor accessory protein 1
ENSG00000069424	KCNAB2	89.7654	1.13545	0.29989	0.000152947	0.0467827	potassium voltage-gated channel, shaker-related subfamily, beta member 2
ENSG00000110844	PRPF40B	77.5425	0.847023	0.220413	0.000121597	0.0467827	PRP40 pre-mRNA processing factor 40 homolog B (S. cerevisiae)
ENSG00000113389	NPR3	57.0425	1.4761	0.386343	0.000133081	0.0467827	natriuretic peptide receptor C/guanylate cyclase C (atrionatriuretic peptide receptor C)
ENSG00000123560	PLP1	14.3966	-2.45885	0.647363	0.000145718	0.0467827	proteolipid protein 1
ENSG00000128052	KDR	429.482	-1.18915	0.312352	0.000140616	0.0467827	kinase insert domain receptor (a type III receptor tyrosine kinase)
ENSG00000134245	WNT2B	30.9701	1.66536	0.433068	0.000120315	0.0467827	wingless-type MMTV integration site family, member 2B
ENSG00000135338	LCA5	15.0288	-1.60861	0.418182	0.000119734	0.0467827	Leber congenital amaurosis 5
ENSG00000147121	KRBOX4	84.0687	0.751527	0.19834	0.000151203	0.0467827	KRAB box domain containing 4
ENSG00000152382	TADA1	269.108	-0.497062	0.130581	0.000140928	0.0467827	transcriptional adaptor 1
ENSG00000161574	CCL15-CCL14	342.916	0.973683	0.256364	0.000145839	0.0467827	CCL15-CCL14 readthrough (NMD candidate)
ENSG00000171119	NRTN	138.267	0.792355	0.209023	0.000150185	0.0467827	neurturin
ENSG00000175161	CADM2	13.4141	-1.87477	0.490074	0.000130517	0.0467827	cell adhesion molecule 2
ENSG00000196741	CXorf24	10.6078	-1.64054	0.426267	0.000118784	0.0467827	chromosome X open reading frame 24
ENSG00000091073	DTX2	85.5096	0.576414	0.152597	0.000158505	0.0468843	deltex homolog 2 (Drosophila)
ENSG00000138722	MMRN1	78.4156	-1.69562	0.449886	0.000163904	0.0468843	multimerin 1
ENSG00000168528	SERINC2	989.299	0.629569	0.166844	0.000161045	0.0468843	serine incorporator 2
ENSG00000204710	SPDYC	15.047	-1.54473	0.410205	0.000166052	0.0468843	speedy/RINGO cell cycle regulator family member C
ENSG00000128694	OSGEPL1	56.2844	-0.889096	0.237292	0.000179073	0.0496066	O-sialoglycoprotein endopeptidase-like 1
ENSG00000100227	POLDIP3	396.326	-0.522544	0.140398	0.000197751	0.0531909	polymerase (DNA-directed), delta interacting protein 3
ENSG00000105369	CD79A	16.157	-1.54241	0.415641	0.000206503	0.0531909	CD79a molecule, immunoglobulin-associated alpha
ENSG00000132274	TRIM22	226.955	1.03394	0.278312	0.000203183	0.0531909	tripartite motif containing 22
ENSG00000177606	JUN	887.035	1.16589	0.313896	0.000203793	0.0531909	jun proto-oncogene
ENSG00000123342	MMP19	24.4892	1.6423	0.443727	0.000214627	0.0543302	matrix metallopeptidase 19
ENSG00000171885	AQP4	21.8604	1.66424	0.451329	0.000226541	0.0563741	aquaporin 4
ENSG00000087152	ATXN7L3	294.912	-0.543045	0.148438	0.000253806	0.0620345	ataxin 7-like 3
ENSG00000125124	BBS2	142.799	-0.558046	0.152916	0.000262898	0.0620345	Bardet-Biedl syndrome 2
ENSG00000164398	ACSL6	67.7231	-0.932856	0.255846	0.000266188	0.0620345	acyl-CoA synthetase long-chain family member 6
ENSG00000197568	HHLA3	49.646	0.821906	0.225133	0.000261459	0.0620345	HERV-H LTR-associating 3
ENSG00000064989	CALCRL	143.631	-1.23076	0.339298	0.000286327	0.0649237	calcitonin receptor-like
ENSG00000100147	CCDC134	13.395	-1.09589	0.302201	0.00028743	0.0649237	coiled-coil domain containing 134
ENSG00000167972	ABCA3	42.2881	0.583342	0.162361	0.000327058	0.0706158	ATP-binding cassette, sub-family A (ABC1), member 3
ENSG00000173917	HOXB2	28.4311	-1.41046	0.392154	0.000322271	0.0706158	homeobox B2
ENSG00000176533	GNG7	160.297	-0.61322	0.17051	0.000322663	0.0706158	guanine nucleotide binding protein (G protein), gamma 7
ENSG00000063438	AHRR	9.78625	-1.80601	0.512209	0.000422007	0.0726115	aryl-hydrocarbon receptor repressor
ENSG00000122566	HNRNPA2B1	3901.61	-0.232142	0.0653323	0.000380491	0.0726115	heterogeneous nuclear ribonucleoprotein A2/B1
ENSG00000129474	AJUBA	367.58	0.663856	0.187057	0.000386768	0.0726115	ajuba LIM protein
ENSG00000132256	TRIM5	152.926	1.00402	0.284223	0.000411642	0.0726115	tripartite motif containing 5
ENSG00000132881	RSG1	37.8668	-0.938801	0.265294	0.000402067	0.0726115	REM2 and RAB-like small GTPase 1
ENSG00000133302	ANKRD32	36.5657	1.14146	0.321971	0.000392292	0.0726115	ankyrin repeat domain 32
ENSG00000134769	DTNA	17.1167	1.78342	0.506007	0.000424274	0.0726115	dystrobrevin, alpha
ENSG00000138002	IFT172	91.3141	1.00602	0.285738	0.000430269	0.0726115	intraflagellar transport 172 homolog (Chlamydomonas)
ENSG00000143297	FCRL5	11.3123	-1.89645	0.538631	0.000430142	0.0726115	Fc receptor-like 5
ENSG00000144504	ANKMY1	92.7896	-0.798865	0.225334	0.000392252	0.0726115	ankyrin repeat and MYND domain containing 1
ENSG00000151131	C12orf45	42.2739	0.785621	0.22293	0.000424957	0.0726115	chromosome 12 open reading frame 45
ENSG00000167595	C19orf55	32.6281	1.05791	0.295436	0.000342493	0.0726115	chromosome 19 open reading frame 55
ENSG00000172379	ARNT2	18.9837	-1.41659	0.397344	0.000363635	0.0726115	aryl-hydrocarbon receptor nuclear translocator 2
ENSG00000182903	ZNF721	117.636	0.80424	0.22535	0.000358554	0.0726115	zinc finger protein 721
ENSG00000183655	KLHL25	73.4274	0.715777	0.20296	0.000420801	0.0726115	kelch-like family member 25
ENSG00000213865	C8orf44	18.8777	-1.33811	0.376672	0.000381651	0.0726115	chromosome 8 open reading frame 44
ENSG00000268927	FLJ00418	40.8743	-2.28108	0.641336	0.000375446	0.0726115
ENSG00000269636	AC010441.1	22.9964	1.2397	0.351577	0.000421698	0.0726115
ENSG00000102984	ZNF821	32.6108	1.0384	0.295346	0.000438323	0.0731302	zinc finger protein 821
ENSG00000136891	TEX10	104.022	-0.649695	0.185196	0.000451248	0.0738031	testis expressed 10
ENSG00000138623	SEMA7A	14.4413	-1.20974	0.345078	0.000455392	0.0738031	semaphorin 7A, GPI membrane anchor (John Milton Hagen blood group)
ENSG00000198270	TMEM116	71.7416	-0.84725	0.24196	0.000462463	0.0738031	transmembrane protein 116
ENSG00000244734	HBB	937.632	-1.62707	0.464527	0.000460685	0.0738031	hemoglobin, beta
ENSG00000100368	CSF2RB	54.4249	-1.4825	0.4241	0.00047293	0.0746619	colony stimulating factor 2 receptor, beta, low-affinity (granulocyte-macrophage)
ENSG00000010327	STAB1	1296.11	0.737124	0.211698	0.000497767	0.0776369	stabilin 1
ENSG00000172432	GTPBP2	166.343	0.574726	0.165175	0.00050235	0.0776369	GTP binding protein 2
ENSG00000224997	AL049840.1	7.35463	-2.07611	0.597593	0.00051254	0.0783866	Uncharacterized protein; cDNA FLJ53535
ENSG00000162642	C1orf52	85.7272	-0.674471	0.194395	0.000521262	0.0788987	chromosome 1 open reading frame 52
ENSG00000108405	P2RX1	6.96868	-1.72739	0.498474	0.000529539	0.0793336	purinergic receptor P2X, ligand-gated ion channel, 1
ENSG00000083750	RRAGB	65.9983	0.834041	0.241762	0.000560908	0.0804101	Ras-related GTP binding B
ENSG00000108798	ABI3	76.6788	1.1648	0.338044	0.000569585	0.0804101	ABI family, member 3
ENSG00000135899	SP110	108.977	0.796677	0.230911	0.000560281	0.0804101	SP110 nuclear body protein
ENSG00000154767	XPC	396.161	-0.466934	0.135108	0.000548262	0.0804101	xeroderma pigmentosum, complementation group C
ENSG00000175106	TVP23C	17.1284	-1.37912	0.400064	0.000566351	0.0804101	trans-golgi network vesicle protein 23 homolog C (S. cerevisiae)
ENSG00000177045	SIX5	186.965	-0.667528	0.193695	0.000568331	0.0804101	SIX homeobox 5
ENSG00000144535	DIS3L2	128.4	0.590047	0.171376	0.000575327	0.0804472	DIS3 mitotic control homolog (S. cerevisiae)-like 2
ENSG00000138686	BBS7	25.1823	-1.13678	0.331274	0.000600143	0.0831254	Bardet-Biedl syndrome 7
ENSG00000059378	PARP12	212.833	0.563148	0.164283	0.000608212	0.0833673	poly (ADP-ribose) polymerase family, member 12
ENSG00000133997	MED6	94.3609	-0.693309	0.202385	0.000613245	0.0833673	mediator complex subunit 6
ENSG00000117245	KIF17	15.6343	-1.43218	0.4197	0.000643975	0.0846582	kinesin family member 17
ENSG00000143341	HMCN1	146.187	0.764997	0.223947	0.00063554	0.0846582	hemicentin 1
ENSG00000154358	OBSCN	71.2897	0.79468	0.232934	0.000645806	0.0846582	obscurin, cytoskeletal calmodulin and titin-interacting RhoGEF
ENSG00000198556	ZNF789	81.4055	0.762379	0.223397	0.00064331	0.0846582	zinc finger protein 789
ENSG00000005108	THSD7A	41.0406	0.88893	0.261451	0.000673886	0.0868078	thrombospondin, type I, domain containing 7A
ENSG00000104936	DMPK	166.06	0.878388	0.258536	0.000679941	0.0868078	dystrophia myotonica-protein kinase
ENSG00000165923	AGBL2	75.5308	1.17654	0.346192	0.000677496	0.0868078	ATP/GTP binding protein-like 2
ENSG00000173482	PTPRM	218.22	0.488746	0.144065	0.000692469	0.087645	protein tyrosine phosphatase, receptor type, M
ENSG00000090989	EXOC1	112.36	-0.469535	0.138501	0.000698597	0.087665	exocyst complex component 1
ENSG00000143258	USP21	89.5721	0.735683	0.21737	0.000713156	0.0887336	ubiquitin specific peptidase 21
ENSG00000107949	BCCIP	292.682	-0.315191	0.0933037	0.000729825	0.0900445	BRCA2 and CDKN1A interacting protein
ENSG00000092068	SLC7A8	100.57	-1.25493	0.371903	0.000739901	0.0905269	solute carrier family 7 (amino acid transporter light chain, L system), member 8
ENSG00000170624	SGCD	23.0371	1.03212	0.306099	0.000746604	0.0905921	sarcoglycan, delta (35kDa dystrophin-associated glycoprotein)
ENSG00000174996	KLC2	58.556	0.809996	0.240696	0.000764819	0.0920416	kinesin light chain 2
ENSG00000087074	PPP1R15A	143.657	0.607275	0.181238	0.000806042	0.0924857	protein phosphatase 1, regulatory subunit 15A
ENSG00000111254	AKAP3	14.4347	-1.51057	0.450669	0.00080277	0.0924857	A kinase (PRKA) anchor protein 3
ENSG00000118515	SGK1	484.964	0.788405	0.234692	0.000781356	0.0924857	serum/glucocorticoid regulated kinase 1
ENSG00000126878	AIF1L	25.9446	-1.22807	0.365941	0.000790959	0.0924857	allograft inflammatory factor 1-like
ENSG00000162772	ATF3	126.963	1.11229	0.331964	0.000806305	0.0924857	activating transcription factor 3
ENSG00000182472	CAPN12	272.612	1.10245	0.328237	0.000783058	0.0924857	calpain 12
ENSG00000142444	C19orf52	93.6653	-0.752332	0.22526	0.000838252	0.0939483	chromosome 19 open reading frame 52
ENSG00000160307	S100B	8.66133	-1.82422	0.545633	0.000827888	0.0939483	S100 calcium binding protein B
ENSG00000197808	ZNF461	24.5317	-1.18389	0.354337	0.000834383	0.0939483	zinc finger protein 461
ENSG00000077721	UBE2A	184.442	0.356021	0.106759	0.000853549	0.094938	ubiquitin-conjugating enzyme E2A
ENSG00000110395	CBL	110.32	-0.861158	0.258706	0.000872468	0.0952898	Cbl proto-oncogene, E3 ubiquitin protein ligase
ENSG00000163563	MNDA	48.8443	-1.50038	0.450683	0.000871185	0.0952898	myeloid cell nuclear differentiation antigen
ENSG00000172497	ACOT12	866.73	0.512938	0.154178	0.000878129	0.0952898	acyl-CoA thioesterase 12
ENSG00000204169	AGAP7	15.8138	2.75718	0.829108	0.000882674	0.0952898	ArfGAP with GTPase domain, ankyrin repeat and PH domain 7
ENSG00000197283	SYNGAP1	47.5448	-1.13907	0.343237	0.000904677	0.0969523	synaptic Ras GTPase activating protein 1
ENSG00000141469	SLC14A1	21.2473	-1.4856	0.450607	0.000977594	0.0983085	solute carrier family 14 (urea transporter), member 1 (Kidd blood group)
ENSG00000141574	SECTM1	79.7991	-0.846655	0.25671	0.000973439	0.0983085	secreted and transmembrane 1
ENSG00000141696	LEPREL4	49.858	-0.825259	0.250302	0.000977042	0.0983085	leprecan-like 4
ENSG00000146733	PSPH	59.244	-0.805759	0.243861	0.000952547	0.0983085	phosphoserine phosphatase
ENSG00000164576	SAP30L	403.42	-0.406817	0.122878	0.000930526	0.0983085	SAP30-like
ENSG00000164961	KIAA0196	189.019	-0.739983	0.22416	0.000962939	0.0983085	KIAA0196
ENSG00000168807	SNTB2	165.333	0.562863	0.170657	0.000973052	0.0983085	syntrophin, beta 2 (dystrophin-associated protein A1, 59kDa, basic component 2)
ENSG00000204356	NELFE	189.353	-0.476606	0.144426	0.000966864	0.0983085	negative elongation factor complex member E
ENSG00000257028	C15ORF37	79.1024	-0.910408	0.275151	0.000937112	0.0983085	C15orf37 protein; Uncharacterized protein
ENSG00000114786	ABHD14A-ACY1	22.3101	2.23644	0.680261	0.00101038	0.0996659	ABHD14A-ACY1 readthrough (NMD candidate)
ENSG00000133985	TTC9	31.8103	1.34753	0.409609	0.00100256	0.0996659	tetratricopeptide repeat domain 9
ENSG00000186716	BCR	393.303	-0.395596	0.12034	0.00101146	0.0996659	breakpoint cluster region

## Sheet: D-sev. NAFLD-I148M carriers
D - Severe NAFLD vs non severe NAFLD healthy liver in PNPLA3 I148M carriers
ENSEMBL ID	Gene symbol	Mean count	log2FoldChange	log2FoldChange Standard Error	pvalue	padj	description
ENSG00000170421	KRT8	2854.39	0.649978	0.112049	6.5988e-09	9.73323e-05	keratin 8
ENSG00000111057	KRT18	1798.45	0.575633	0.109731	1.55574e-07	0.00114736	keratin 18
ENSG00000198074	AKR1B10	65.1989	3.0233	0.602451	5.21225e-07	0.00256269	aldo-keto reductase family 1, member B10 (aldose reductase)
ENSG00000183484	GPR132	14.513	1.54756	0.32277	1.62987e-06	0.00601014	G protein-coupled receptor 132
ENSG00000008517	IL32	1673.2	1.32084	0.279931	2.37625e-06	0.00649641	interleukin 32
ENSG00000107736	CDH23	306.267	-1.07972	0.230476	2.80326e-06	0.00649641	cadherin-related 23
ENSG00000148795	CYP17A1	47.4852	1.92816	0.41576	3.52348e-06	0.00649641	cytochrome P450, family 17, subfamily A, polypeptide 1
ENSG00000185338	SOCS1	23.4902	1.86124	0.400102	3.28866e-06	0.00649641	suppressor of cytokine signaling 1
ENSG00000023445	BIRC3	160.172	0.866643	0.20157	1.71212e-05	0.0173876	baculoviral IAP repeat containing 3
ENSG00000042493	CAPG	47.1258	1.30468	0.303956	1.76805e-05	0.0173876	capping protein (actin filament), gelsolin-like
ENSG00000075624	ACTB	9645.91	0.422992	0.0985464	1.76824e-05	0.0173876	actin, beta
ENSG00000095970	TREM2	9.35796	2.16514	0.496881	1.31575e-05	0.0173876	triggering receptor expressed on myeloid cells 2
ENSG00000149050	ZNF214	12.3985	-1.38592	0.315925	1.15002e-05	0.0173876	zinc finger protein 214
ENSG00000166716	ZNF592	415.386	-0.504532	0.116952	1.60328e-05	0.0173876	zinc finger protein 592
ENSG00000203872	C6orf163	9.57769	-1.42115	0.324475	1.1876e-05	0.0173876	chromosome 6 open reading frame 163
ENSG00000165280	VCP	1278.57	0.399797	0.0960677	3.16003e-05	0.0268129	valosin containing protein
ENSG00000170323	FABP4	24.0961	1.85405	0.445745	3.19018e-05	0.0268129	fatty acid binding protein 4, adipocyte
ENSG00000184557	SOCS3	102.597	1.37292	0.331522	3.45387e-05	0.0268129	suppressor of cytokine signaling 3
ENSG00000246705	H2AFJ	432.035	0.540623	0.130163	3.27528e-05	0.0268129	H2A histone family, member J
ENSG00000161653	NAGS	498.103	-0.595559	0.144885	3.94689e-05	0.0277222	N-acetylglutamate synthase
ENSG00000172757	CFL1	1472.76	0.396663	0.0962939	3.80038e-05	0.0277222	cofilin 1 (non-muscle)
ENSG00000141873	SLC39A3	190.528	0.531674	0.130199	4.43527e-05	0.0292508	solute carrier family 39 (zinc transporter), member 3
ENSG00000155366	RHOC	605.713	0.381744	0.0938088	4.71374e-05	0.0292508	ras homolog family member C
ENSG00000177138	FAM9B	18.0096	-1.56442	0.38465	4.75945e-05	0.0292508	family with sequence similarity 9, member B
ENSG00000025708	TYMP	1191.92	0.656595	0.163293	5.79618e-05	0.0294806	thymidine phosphorylase
ENSG00000108106	UBE2S	61.4712	0.856328	0.212793	5.71633e-05	0.0294806	ubiquitin-conjugating enzyme E2S
ENSG00000116661	FBXO2	232.431	0.69584	0.17289	5.70364e-05	0.0294806	F-box protein 2
ENSG00000165494	PCF11	293.155	-0.589719	0.14613	5.44701e-05	0.0294806	PCF11 cleavage and polyadenylation factor subunit
ENSG00000198223	CSF2RA	22.4803	1.05577	0.262549	5.79e-05	0.0294806	colony stimulating factor 2 receptor, alpha, low-affinity (granulocyte-macrophage)
ENSG00000073734	ABCB11	483.988	-0.843411	0.211	6.40918e-05	0.0306999	ATP-binding cassette, sub-family B (MDR/TAP), member 11
ENSG00000101412	E2F1	14.7431	1.3712	0.343846	6.66807e-05	0.0306999	E2F transcription factor 1
ENSG00000160213	CSTB	474.746	0.44781	0.112493	6.86846e-05	0.0306999	cystatin B (stefin B)
ENSG00000163435	ELF3	224.186	0.839737	0.210224	6.48324e-05	0.0306999	E74-like factor 3 (ets domain transcription factor, epithelial-specific )
ENSG00000108679	LGALS3BP	1238.78	0.504912	0.127357	7.35386e-05	0.0319028	lectin, galactoside-binding, soluble, 3 binding protein
ENSG00000171448	ZBTB26	32.7413	-0.987809	0.249625	7.58438e-05	0.0319628	zinc finger and BTB domain containing 26
ENSG00000131781	FMO5	2217.72	-0.406181	0.103057	8.10322e-05	0.0329408	flavin containing monooxygenase 5
ENSG00000174428	GTF2IRD2B	339.129	-0.59498	0.151386	8.48644e-05	0.0329408	GTF2I repeat domain containing 2B
ENSG00000206503	HLA-A	3731.57	0.576096	0.146566	8.47281e-05	0.0329408	major histocompatibility complex, class I, A
ENSG00000004838	ZMYND10	13.2998	-1.25372	0.32116	9.47185e-05	0.035823	zinc finger, MYND-type containing 10
ENSG00000126768	TIMM17B	207.222	0.528088	0.135625	9.87086e-05	0.0363988	translocase of inner mitochondrial membrane 17 homolog B (yeast)
ENSG00000117410	ATP6V0B	619.586	0.403747	0.104809	0.00011706	0.0367696	ATPase, H+ transporting, lysosomal 21kDa, V0 subunit b
ENSG00000136986	DERL1	692.652	0.410828	0.106651	0.000117126	0.0367696	derlin 1
ENSG00000138755	CXCL9	116.967	1.46371	0.378891	0.000111942	0.0367696	chemokine (C-X-C motif) ligand 9
ENSG00000181029	TRAPPC5	453.469	0.454332	0.117622	0.000112163	0.0367696	trafficking protein particle complex 5
ENSG00000187545	PRAMEF10	12.9827	2.54951	0.660573	0.000113597	0.0367696	PRAME family member 10
ENSG00000219200	RNASEK	852.44	0.403789	0.104826	0.000117164	0.0367696	ribonuclease, RNase K
ENSG00000254827	SLC22A18AS	22.7827	1.07803	0.278536	0.000108673	0.0367696	solute carrier family 22 (organic cation transporter), member 18 antisense
ENSG00000175785	PRIMA1	7.6216	-1.41807	0.370721	0.000130679	0.0398792	proline rich membrane anchor 1
ENSG00000179862	CITED4	286.378	0.574748	0.150395	0.000132601	0.0398792	Cbp/p300-interacting transactivator, with Glu/Asp-rich carboxy-terminal domain, 4
ENSG00000269113	TRABD2B	103.013	-1.00341	0.262892	0.000135184	0.0398792	TraB domain containing 2B
ENSG00000110092	CCND1	1025.27	0.52958	0.139209	0.000142262	0.0403532	cyclin D1
ENSG00000184545	DUSP8	54.6923	1.77368	0.465778	0.000140101	0.0403532	dual specificity phosphatase 8
ENSG00000064666	CNN2	226.228	0.554026	0.14651	0.000155894	0.0408948	calponin 2
ENSG00000099284	H2AFY2	64.2353	0.774619	0.204649	0.000153642	0.0408948	H2A histone family, member Y2
ENSG00000176014	TUBB6	114.016	0.638373	0.168967	0.000158034	0.0408948	tubulin, beta 6 class V
ENSG00000198718	FAM179B	120.005	-0.650528	0.172073	0.000156491	0.0408948	family with sequence similarity 179, member B
ENSG00000213886	UBD	160.03	1.26064	0.333246	0.000155011	0.0408948	ubiquitin D
ENSG00000115109	EPB41L5	575.514	-0.403744	0.107517	0.00017322	0.0427296	erythrocyte membrane protein band 4.1 like 5
ENSG00000167772	ANGPTL4	734.067	0.897027	0.238601	0.000170238	0.0427296	angiopoietin-like 4
ENSG00000171222	SCAND1	754.501	0.479449	0.127706	0.000173815	0.0427296	SCAN domain containing 1
ENSG00000132846	ZBED3	198.563	-0.578694	0.156133	0.000210217	0.0508311	zinc finger, BED-type containing 3
ENSG00000107957	SH3PXD2A	1216.46	-0.682459	0.184471	0.000215985	0.0513835	SH3 and PX domains 2A
ENSG00000171747	LGALS4	487.611	0.91395	0.247532	0.000222276	0.0520407	lectin, galactoside-binding, soluble, 4
ENSG00000185883	ATP6V0C	696.342	0.424251	0.115061	0.000226742	0.0522571	ATPase, H+ transporting, lysosomal 16kDa, V0 subunit c
ENSG00000205758	CRYZL1	110.949	-0.50529	0.137245	0.000231729	0.0525846	crystallin, zeta (quinone reductase)-like 1
ENSG00000107186	MPDZ	1332.69	-0.425219	0.115718	0.000238214	0.0532373	multiple PDZ domain protein
ENSG00000130489	SCO2	193.942	0.553036	0.150854	0.000246331	0.0536634	SCO2 cytochrome c oxidase assembly protein
ENSG00000189067	LITAF	699.443	0.432662	0.118054	0.000247398	0.0536634	lipopolysaccharide-induced TNF factor
ENSG00000005486	RHBDD2	414.117	0.397261	0.10883	0.000261941	0.0536869	rhomboid domain containing 2
ENSG00000103876	FAH	2157.49	0.312968	0.0857405	0.000262065	0.0536869	fumarylacetoacetate hydrolase (fumarylacetoacetase)
ENSG00000129244	ATP1B2	32.277	-1.15323	0.315466	0.000256526	0.0536869	ATPase, Na+/K+ transporting, beta 2 polypeptide
ENSG00000134339	SAA2	1318.17	1.68193	0.459503	0.000251896	0.0536869	serum amyloid A2
ENSG00000013275	PSMC4	402.681	0.335603	0.0923382	0.000278515	0.0540539	proteasome (prosome, macropain) 26S subunit, ATPase, 4
ENSG00000115009	CCL20	6.32713	2.31225	0.635995	0.000277279	0.0540539	chemokine (C-C motif) ligand 20
ENSG00000117983	MUC5B	59.6462	-1.84528	0.507059	0.00027351	0.0540539	mucin 5B, oligomeric mucus/gel-forming
ENSG00000185920	PTCH1	98.4902	-0.690648	0.189572	0.000269269	0.0540539	patched 1
ENSG00000149541	B3GAT3	214.147	0.404829	0.111819	0.000294156	0.0563481	beta-1,3-glucuronyltransferase 3 (glucuronosyltransferase I)
ENSG00000104951	IL4I1	19.6078	1.27953	0.35421	0.00030342	0.0566511	interleukin 4 induced 1
ENSG00000175416	CLTB	397.231	0.404073	0.1118	0.000301226	0.0566511	clathrin, light chain B
ENSG00000092841	MYL6	2999.54	0.376593	0.104583	0.0003171	0.0572175	myosin, light chain 6, alkali, smooth muscle and non-muscle
ENSG00000108602	ALDH3A1	16.9184	1.71149	0.4754	0.000318091	0.0572175	aldehyde dehydrogenase 3 family, member A1
ENSG00000141198	TOM1L1	417.827	-0.403647	0.112011	0.000313788	0.0572175	target of myb1 (chicken)-like 1
ENSG00000100985	MMP9	26.5346	1.551	0.433391	0.000345231	0.0608709	matrix metallopeptidase 9 (gelatinase B, 92kDa gelatinase, 92kDa type IV collagenase)
ENSG00000123496	IL13RA2	44.4161	-1.26343	0.353141	0.000346655	0.0608709	interleukin 13 receptor, alpha 2
ENSG00000170190	SLC16A5	36.655	-1.18565	0.332026	0.000355678	0.0610565	solute carrier family 16 (monocarboxylate transporter), member 5
ENSG00000174194	AGAP8	49.9425	-1.12027	0.313738	0.000355991	0.0610565	ArfGAP with GTPase domain, ankyrin repeat and PH domain 8
ENSG00000013364	MVP	508.313	0.426599	0.120301	0.000390982	0.0659851	major vault protein
ENSG00000177463	NR2C2	75.2044	-0.738421	0.208341	0.000393674	0.0659851	nuclear receptor subfamily 2, group C, member 2
ENSG00000112473	SLC39A7	840.103	0.406328	0.114764	0.000399266	0.0661705	solute carrier family 39 (zinc transporter), member 7
ENSG00000109625	CPZ	16.0091	1.35052	0.382369	0.000412447	0.0668526	carboxypeptidase Z
ENSG00000173898	SPTBN2	970.496	-0.463843	0.13123	0.000408402	0.0668526	spectrin, beta, non-erythrocytic 2
ENSG00000189227	C15orf61	56.8665	0.726744	0.206153	0.000423069	0.067829	chromosome 15 open reading frame 61
ENSG00000123560	PLP1	20.4805	-1.64586	0.469377	0.000454093	0.0688741	proteolipid protein 1
ENSG00000128805	ARHGAP22	14.5317	1.31585	0.375483	0.000457604	0.0688741	Rho GTPase activating protein 22
ENSG00000130522	JUND	1425.96	0.69507	0.197958	0.000446087	0.0688741	jun D proto-oncogene
ENSG00000153976	HS3ST3A1	29.8925	-1.12714	0.321093	0.000447578	0.0688741	heparan sulfate (glucosamine) 3-O-sulfotransferase 3A1
ENSG00000164687	FABP5	39.7855	0.9796	0.279448	0.000455774	0.0688741	fatty acid binding protein 5 (psoriasis-associated)
ENSG00000234745	HLA-B	3944.19	0.528817	0.150521	0.000442673	0.0688741	major histocompatibility complex, class I, B
ENSG00000123159	GIPC1	288.3	0.421648	0.121478	0.000518532	0.0703047	GIPC PDZ domain containing family, member 1
ENSG00000125650	PSPN	29.5316	0.885066	0.254783	0.000513144	0.0703047	persephin
ENSG00000136169	SETDB2	123.931	-0.521716	0.149521	0.00048437	0.0703047	SET domain, bifurcated 2
ENSG00000145050	MANF	377.944	0.808284	0.231659	0.000484628	0.0703047	mesencephalic astrocyte-derived neurotrophic factor
ENSG00000149260	CAPN5	1022.36	-0.382118	0.109945	0.000509843	0.0703047	calpain 5
ENSG00000158710	TAGLN2	828.347	0.439583	0.125783	0.000474462	0.0703047	transgelin 2
ENSG00000164061	BSN	83.4087	-1.06685	0.306412	0.000498157	0.0703047	bassoon presynaptic cytomatrix protein
ENSG00000164924	YWHAZ	1023.1	0.256029	0.0737642	0.000518688	0.0703047	tyrosine 3-monooxygenase/tryptophan 5-monooxygenase activation protein, zeta
ENSG00000182718	ANXA2	491.726	0.605825	0.173757	0.00048917	0.0703047	annexin A2
ENSG00000186787	SPIN2B	26.8993	0.99184	0.285794	0.00051954	0.0703047	spindlin family, member 2B
ENSG00000196177	ACADSB	5448.82	-0.396431	0.114026	0.000507695	0.0703047	acyl-CoA dehydrogenase, short/branched chain
ENSG00000135697	BCMO1	8.72845	1.16729	0.336721	0.000527002	0.0706662	beta-carotene 15,15'-monooxygenase 1
ENSG00000119737	GPR75	35.1213	-0.936439	0.27063	0.000539745	0.0717229	G protein-coupled receptor 75
ENSG00000008311	AASS	601.993	-0.693338	0.200943	0.000559729	0.073544	aminoadipate-semialdehyde synthase
ENSG00000173889	PHC3	353.864	-0.456903	0.132488	0.000563422	0.073544	polyhomeotic homolog 3 (Drosophila)
ENSG00000068366	ACSL4	193.944	0.958048	0.278622	0.000584892	0.0742743	acyl-CoA synthetase long-chain family member 4
ENSG00000070404	FSTL3	143.908	0.782994	0.228746	0.000619372	0.0742743	follistatin-like 3 (secreted glycoprotein)
ENSG00000102109	PCSK1N	29.9588	2.75964	0.802238	0.000581875	0.0742743	proprotein convertase subtilisin/kexin type 1 inhibitor
ENSG00000108821	COL1A1	602.81	0.749373	0.218814	0.000615465	0.0742743	collagen, type I, alpha 1
ENSG00000129355	CDKN2D	22.6751	0.886671	0.258592	0.000606158	0.0742743	cyclin-dependent kinase inhibitor 2D (p19, inhibits CDK4)
ENSG00000135404	CD63	2642.1	0.314278	0.0917852	0.000616927	0.0742743	CD63 molecule
ENSG00000153956	CACNA2D1	17.7015	-1.02855	0.299699	0.00059927	0.0742743	calcium channel, voltage-dependent, alpha 2/delta subunit 1
ENSG00000170959	DCDC1	75.8139	-0.870213	0.254194	0.000618371	0.0742743	doublecortin domain containing 1
ENSG00000175445	LPL	14.0085	1.91012	0.556021	0.000591831	0.0742743	lipoprotein lipase
ENSG00000184990	SIVA1	543.921	0.376853	0.109749	0.000595238	0.0742743	SIVA1, apoptosis-inducing factor
ENSG00000183578	TNFAIP8L3	6.98046	1.29785	0.379893	0.000634645	0.0748881	tumor necrosis factor, alpha-induced protein 8-like 3
ENSG00000188186	LAMTOR4	290.934	0.373569	0.109347	0.000634609	0.0748881	late endosomal/lysosomal adaptor, MAPK and MTOR activator 4
ENSG00000108518	PFN1	3352.8	0.314454	0.0922003	0.000648307	0.0758593	profilin 1
ENSG00000187134	AKR1C1	3494.85	0.439495	0.128953	0.000653995	0.0758593	aldo-keto reductase family 1, member C1
ENSG00000188611	ASAH2	30.0469	0.844487	0.247913	0.000658304	0.0758593	N-acylsphingosine amidohydrolase (non-lysosomal ceramidase) 2
ENSG00000140264	SERF2	3671.71	0.282389	0.083391	0.000708374	0.0805193	small EDRK-rich factor 2
ENSG00000160460	SPTBN4	27.9919	-1.06416	0.314298	0.000709662	0.0805193	spectrin, beta, non-erythrocytic 4
ENSG00000074410	CA12	13.4645	1.72515	0.510514	0.000726877	0.0818431	carbonic anhydrase XII
ENSG00000167565	SERTAD3	62.8222	0.73763	0.218521	0.000736656	0.0818623	SERTA domain containing 3
ENSG00000241553	ARPC4	581.475	0.281697	0.0834658	0.000738149	0.0818623	actin related protein 2/3 complex, subunit 4, 20kDa
ENSG00000101421	CHMP4B	411.198	0.408461	0.121129	0.00074592	0.0820059	charged multivesicular body protein 4B
ENSG00000101443	WFDC2	6.92428	1.94011	0.575632	0.000750562	0.0820059	WAP four-disulfide core domain 2
ENSG00000182327	GLTPD2	1077.79	0.504968	0.150086	0.000766733	0.0831567	glycolipid transfer protein domain containing 2
ENSG00000115419	GLS	139.094	0.563358	0.167849	0.000789821	0.0832133	glutaminase
ENSG00000124762	CDKN1A	360.733	0.664474	0.197969	0.000789478	0.0832133	cyclin-dependent kinase inhibitor 1A (p21, Cip1)
ENSG00000173156	RHOD	346.114	0.375523	0.11188	0.000789419	0.0832133	ras homolog family member D
ENSG00000185043	CIB1	738.518	0.397449	0.118227	0.000774505	0.0832133	calcium and integrin binding 1 (calmyrin)
ENSG00000147872	PLIN2	2976.03	0.551111	0.164304	0.000795928	0.083262	perilipin 2
ENSG00000156869	FRRS1	210.684	-0.772145	0.230414	0.000804831	0.0836004	ferric-chelate reductase 1
ENSG00000136816	TOR1B	214.246	0.540679	0.162173	0.00085616	0.0870922	torsin family 1, member B (torsin B)
ENSG00000170638	TRABD	345.149	0.423523	0.127016	0.000854801	0.0870922	TraB domain containing
ENSG00000185825	BCAP31	909.059	0.32653	0.0978839	0.000850261	0.0870922	B-cell receptor-associated protein 31
ENSG00000109320	NFKB1	274.089	0.277648	0.0834147	0.000873084	0.0882054	nuclear factor of kappa light polypeptide gene enhancer in B-cells 1
ENSG00000223865	HLA-DPB1	721.028	0.56408	0.169783	0.000892575	0.0895611	major histocompatibility complex, class II, DP beta 1
ENSG00000101160	CTSZ	3496.51	0.362163	0.109174	0.000908948	0.0896982	cathepsin Z
ENSG00000144488	ESPNL	48.5392	-1.08171	0.326428	0.000920486	0.0896982	espin-like
ENSG00000166923	GREM1	25.6719	-1.56201	0.470519	0.00090093	0.0896982	gremlin 1, DAN family BMP antagonist
ENSG00000167797	CDK2AP2	445.058	0.371227	0.111971	0.000915213	0.0896982	cyclin-dependent kinase 2 associated protein 2
ENSG00000205502	C2CD4B	13.983	1.35371	0.408655	0.000924348	0.0896982	C2 calcium-dependent domain containing 4B
ENSG00000146426	TIAM2	22.4781	-1.12869	0.341112	0.000936792	0.0903116	T-cell lymphoma invasion and metastasis 2
ENSG00000198894	CIPC	188.279	-0.410126	0.124051	0.000946005	0.0906076	CLOCK-interacting pacemaker
ENSG00000140105	WARS	343.63	0.382824	0.115981	0.000964244	0.0912538	tryptophanyl-tRNA synthetase
ENSG00000216490	IFI30	542.112	0.525802	0.15931	0.000965124	0.0912538	interferon, gamma-inducible protein 30
ENSG00000080298	RFX3	34.4253	-0.85885	0.260575	0.000980766	0.0915588	regulatory factor X, 3 (influences HLA class II expression)
ENSG00000178338	ZNF354B	44.2272	-0.816119	0.247595	0.000980049	0.0915588	zinc finger protein 354B
ENSG00000131981	LGALS3	94.5018	0.705246	0.214264	0.000996638	0.0918776	lectin, galactoside-binding, soluble, 3
ENSG00000151327	FAM177A1	255.085	0.440993	0.133975	0.000996133	0.0918776	family with sequence similarity 177, member A1
ENSG00000120725	SIL1	723.514	0.401683	0.122335	0.00102538	0.0929167	SIL1 nucleotide exchange factor
ENSG00000157933	SKI	524.55	-0.402891	0.122782	0.00103311	0.0929167	v-ski avian sarcoma viral oncogene homolog
ENSG00000182208	MOB2	149.515	0.362611	0.110462	0.00102828	0.0929167	MOB kinase activator 2
ENSG00000185513	L3MBTL1	47.8052	-0.981627	0.298704	0.00101515	0.0929167	l(3)mbt-like 1 (Drosophila)
ENSG00000108528	SLC25A11	505.612	0.283893	0.0866489	0.00105154	0.0931041	solute carrier family 25 (mitochondrial carrier; oxoglutarate carrier), member 11
ENSG00000164742	ADCY1	2080.04	-0.370318	0.113051	0.00105413	0.0931041	adenylate cyclase 1 (brain)
ENSG00000183889	NPIPA7	291.285	-0.637561	0.194622	0.00105329	0.0931041	Protein PKD1P1
ENSG00000034510	TMSB10	992.597	0.41692	0.12763	0.00108838	0.0938805	thymosin beta 10
ENSG00000102316	MAGED2	478.606	0.310618	0.0950346	0.00108129	0.0938805	melanoma antigen family D, 2
ENSG00000143862	ARL8A	286.399	0.411605	0.125989	0.00108697	0.0938805	ADP-ribosylation factor-like 8A
ENSG00000172269	DPAGT1	172.415	0.524375	0.160396	0.00107828	0.0938805	dolichyl-phosphate (UDP-N-acetylglucosamine) N-acetylglucosaminephosphotransferase 1 (GlcNAc-1-P transferase)
ENSG00000159199	ATP5G1	370.982	0.422433	0.129481	0.00110426	0.0941134	ATP synthase, H+ transporting, mitochondrial Fo complex, subunit C1 (subunit 9)
ENSG00000170382	LRRN2	25.5661	-1.06486	0.326545	0.00111022	0.0941134	leucine rich repeat neuronal 2
ENSG00000247626	MARS2	45.2272	0.653003	0.200217	0.00110834	0.0941134	methionyl-tRNA synthetase 2, mitochondrial
ENSG00000034152	MAP2K3	504.939	0.34929	0.107212	0.00112229	0.0945929	mitogen-activated protein kinase kinase 3
ENSG00000172354	GNB2	894.294	0.348294	0.106961	0.00112882	0.0946027	guanine nucleotide binding protein (G protein), beta polypeptide 2
ENSG00000204084	INPP5B	296.941	-0.458593	0.141069	0.00115067	0.0958893	inositol polyphosphate-5-phosphatase, 75kDa
ENSG00000105618	PRPF31	380.048	0.274734	0.0846817	0.00117736	0.0972572	pre-mRNA processing factor 31
ENSG00000247596	TWF2	235.213	0.478534	0.147531	0.00118027	0.0972572	twinfilin actin-binding protein 2
ENSG00000168389	MFSD2A	1535.79	0.474987	0.146664	0.00120116	0.0981625	major facilitator superfamily domain containing 2A
ENSG00000171817	ZNF540	31.9177	-0.873124	0.269666	0.00120457	0.0981625	zinc finger protein 540
ENSG00000092439	TRPM7	547.098	-0.50633	0.156739	0.00123619	0.098709	transient receptor potential cation channel, subfamily M, member 7
ENSG00000106993	CDC37L1	307.376	0.39095	0.121081	0.00124291	0.098709	cell division cycle 37-like 1
ENSG00000166794	PPIB	3089.2	0.30037	0.0930139	0.00124092	0.098709	peptidylprolyl isomerase B (cyclophilin B)
ENSG00000198910	L1CAM	16.6932	-1.1918	0.368899	0.00123493	0.098709	L1 cell adhesion molecule
ENSG00000231925	TAPBP	1657.91	0.351678	0.108932	0.00124474	0.098709	TAP binding protein (tapasin)
ENSG00000124145	SDC4	1846.91	0.465449	0.144606	0.00128759	0.0990786	syndecan 4
ENSG00000124766	SOX4	127.065	0.593639	0.184264	0.00127442	0.0990786	SRY (sex determining region Y)-box 4
ENSG00000130312	MRPL34	678.118	0.302615	0.0939626	0.00127926	0.0990786	mitochondrial ribosomal protein L34
ENSG00000164068	RNF123	742.964	-0.343449	0.106759	0.00129517	0.0990786	ring finger protein 123
ENSG00000166920	C15orf48	7.3996	1.62905	0.505636	0.00127396	0.0990786	chromosome 15 open reading frame 48
ENSG00000178115	GOLGA8Q	18.2369	-1.15377	0.358672	0.00129642	0.0990786	golgin A8 family, member Q
ENSG00000198171	DDRGK1	624.862	0.31577	0.0979023	0.00125814	0.0990786	DDRGK domain containing 1

## Sheet: E-NASH
E - NASH, yes vs no
ENSEMBL ID	Gene symbol	Mean count	log2FoldChange	log2FoldChange Standard Error	pvalue	padj	description
ENSG00000164066	INTU	42.0581	-1.56578	0.306478	3.2399e-07	0.00340681	inturned planar cell polarity protein
ENSG00000215186	GOLGA6B	34.1892	-2.37266	0.469232	4.27079e-07	0.00340681	golgin A6 family, member B
ENSG00000149503	INCENP	49.1139	-1.22595	0.254751	1.49152e-06	0.00450045	inner centromere protein antigens 135/155kDa
ENSG00000170421	KRT8	3040.3	0.696038	0.146221	1.93431e-06	0.00450045	keratin 8
ENSG00000185513	L3MBTL1	43.3435	-1.62751	0.336055	1.27893e-06	0.00450045	l(3)mbt-like 1 (Drosophila)
ENSG00000197375	SLC22A5	112.837	-1.12569	0.236689	1.97463e-06	0.00450045	solute carrier family 22 (organic cation/carnitine transporter), member 5
ENSG00000206562	METTL6	44.7356	-1.25109	0.257183	1.147e-06	0.00450045	methyltransferase like 6
ENSG00000018699	TTC27	62.3903	-1.18953	0.25218	2.39356e-06	0.00477335	tetratricopeptide repeat domain 27
ENSG00000184574	LPAR5	20.9747	-1.97588	0.422274	2.88078e-06	0.00510666	lysophosphatidic acid receptor 5
ENSG00000070950	RAD18	48.6696	-1.22415	0.267535	4.74719e-06	0.00553639	RAD18 homolog (S. cerevisiae)
ENSG00000104093	DMXL2	174	-1.07691	0.236232	5.14726e-06	0.00553639	Dmx-like 2
ENSG00000163629	PTPN13	35.8497	-1.53576	0.335846	4.81228e-06	0.00553639	protein tyrosine phosphatase, non-receptor type 13 (APO-1/CD95 (Fas)-associated phosphatase)
ENSG00000171488	LRRC8C	55.4904	-1.35894	0.299144	5.55235e-06	0.00553639	leucine rich repeat containing 8 family, member C
ENSG00000176593	CTD-2368P22.1	30.7296	-1.49483	0.32255	3.57945e-06	0.00553639	HCG1811579; Uncharacterized protein
ENSG00000178460	MCMDC2	8.87484	-2.27206	0.496772	4.79327e-06	0.00553639	minichromosome maintenance domain containing 2
ENSG00000134874	DZIP1	38.3647	-1.39831	0.30918	6.10793e-06	0.00573211	DAZ interacting zinc finger protein 1
ENSG00000135338	LCA5	15.516	-1.87629	0.417338	6.92934e-06	0.00614171	Leber congenital amaurosis 5
ENSG00000175106	TVP23C	18.1213	-1.8908	0.425045	8.64837e-06	0.0068988	trans-golgi network vesicle protein 23 homolog C (S. cerevisiae)
ENSG00000157510	AFAP1L1	70.443	-1.28778	0.291242	9.79414e-06	0.00744075	actin filament associated protein 1-like 1
ENSG00000203872	C6orf163	8.82984	-2.14183	0.487122	1.09809e-05	0.00796318	chromosome 6 open reading frame 163
ENSG00000067646	ZFY	18.6883	4.55938	1.0691	2.00172e-05	0.0111531	zinc finger protein, Y-linked
ENSG00000083097	DOPEY1	181.343	-0.957348	0.223339	1.81484e-05	0.0111531	dopey family member 1
ENSG00000164125	FAM198B	101.154	-1.48088	0.348092	2.09724e-05	0.0111531	family with sequence similarity 198, member B
ENSG00000165494	PCF11	283.656	-0.720754	0.167619	1.70838e-05	0.0111531	PCF11 cleavage and polyadenylation factor subunit
ENSG00000167601	AXL	214.756	-1.35413	0.317351	1.98144e-05	0.0111531	AXL receptor tyrosine kinase
ENSG00000177463	NR2C2	68.4274	-1.06793	0.250748	2.05363e-05	0.0111531	nuclear receptor subfamily 2, group C, member 2
ENSG00000198146	ZNF770	272.74	-1.31124	0.305934	1.81889e-05	0.0111531	zinc finger protein 770
ENSG00000198523	PLN	7.83499	-3.07397	0.720869	2.00573e-05	0.0111531	phospholamban
ENSG00000151693	ASAP2	71.8147	-1.51672	0.358475	2.32612e-05	0.0115972	ArfGAP with SH3 domain, ankyrin repeat and PH domain 2
ENSG00000256294	ZNF225	28.5464	-1.359	0.321042	2.30519e-05	0.0115972	zinc finger protein 225
ENSG00000186073	C15orf41	27.6741	-1.22308	0.28982	2.44166e-05	0.0118043	chromosome 15 open reading frame 41
ENSG00000143498	TAF1A	16.4173	-1.6489	0.392832	2.69929e-05	0.012666	TATA box binding protein (TBP)-associated factor, RNA polymerase I, A, 48kDa
ENSG00000121454	LHX4	13.3316	-1.83873	0.441657	3.13749e-05	0.0139043	LIM homeobox 4
ENSG00000161583	TBC1D3G	23.2325	-2.12733	0.510513	3.0858e-05	0.0139043	TBC1 domain family, member 3G
ENSG00000113441	LNPEP	198.33	-0.960786	0.23222	3.51274e-05	0.0143491	leucyl/cystinyl aminopeptidase
ENSG00000135720	DYNC1LI2	552.912	-0.832032	0.203167	4.21614e-05	0.0143491	dynein, cytoplasmic 1, light intermediate chain 2
ENSG00000140199	SLC12A6	87.1221	-1.32018	0.321377	3.99287e-05	0.0143491	solute carrier family 12 (potassium/chloride transporter), member 6
ENSG00000141198	TOM1L1	428.716	-0.580431	0.141325	4.0073e-05	0.0143491	target of myb1 (chicken)-like 1
ENSG00000148459	PDSS1	21.6069	-1.16371	0.284198	4.2272e-05	0.0143491	prenyl (decaprenyl) diphosphate synthase, subunit 1
ENSG00000156239	N6AMT1	59.1291	-1.10106	0.266211	3.5337e-05	0.0143491	N-6 adenine-specific DNA methyltransferase 1 (putative)
ENSG00000171448	ZBTB26	32.8295	-1.13331	0.276379	4.12151e-05	0.0143491	zinc finger and BTB domain containing 26
ENSG00000178115	GOLGA8Q	16.0511	-2.01115	0.488271	3.80637e-05	0.0143491	golgin A8 family, member Q
ENSG00000196391	ZNF774	12.7165	-1.90801	0.460517	3.42499e-05	0.0143491	zinc finger protein 774
ENSG00000196724	ZNF418	28.5839	-1.52976	0.37243	3.99947e-05	0.0143491	zinc finger protein 418
ENSG00000130052	STARD8	159.724	-1.29042	0.316111	4.46173e-05	0.0148297	StAR-related lipid transfer (START) domain containing 8
ENSG00000171049	FPR2	10.4408	-1.99555	0.491111	4.83775e-05	0.0154363	formyl peptide receptor 2
ENSG00000198690	FAN1	241.15	-0.814389	0.200222	4.75356e-05	0.0154363	FANCD2/FANCI-associated nuclease 1
ENSG00000173200	PARP15	37.3007	-1.3074	0.322748	5.1036e-05	0.0159653	poly (ADP-ribose) polymerase family, member 15
ENSG00000179348	GATA2	15.6189	-1.69297	0.421465	5.8977e-05	0.0180946	GATA binding protein 2
ENSG00000189067	LITAF	726.917	0.581298	0.14504	6.12722e-05	0.0184441	lipopolysaccharide-induced TNF factor
ENSG00000111057	KRT18	1879.62	0.590716	0.14805	6.60832e-05	0.0191172	keratin 18
ENSG00000198393	ZNF26	39.3268	-1.82003	0.456685	6.73942e-05	0.0191172	zinc finger protein 26
ENSG00000203301	AL590822.1	40.8364	-1.7149	0.430649	6.83015e-05	0.0191172	Uncharacterized protein
ENSG00000246922	UBAP1L	135.495	-1.14621	0.287298	6.61825e-05	0.0191172	ubiquitin associated protein 1-like
ENSG00000213759	UGT2B11	22.2776	-1.72209	0.433235	7.03964e-05	0.0193639	UDP glucuronosyltransferase 2 family, polypeptide B11
ENSG00000178338	ZNF354B	40.177	-1.20219	0.302833	7.193e-05	0.0194503	zinc finger protein 354B
ENSG00000197622	CDC42SE1	249.724	-0.724624	0.183092	7.56759e-05	0.0201222	CDC42 small effector 1
ENSG00000165246	NLGN4Y	7.30331	3.16427	0.803354	8.1883e-05	0.0211103	neuroligin 4, Y-linked
ENSG00000183309	ZNF623	69.1155	-1.09391	0.277756	8.20381e-05	0.0211103	zinc finger protein 623
ENSG00000120800	UTP20	88.4039	-0.848902	0.216787	9.0089e-05	0.0224575	UTP20, small subunit (SSU) processome component, homolog (yeast)
ENSG00000144230	GPR17	37.6842	-1.82454	0.465544	8.88575e-05	0.0224575	G protein-coupled receptor 17
ENSG00000204323	SMIM5	13.9484	-1.72959	0.443307	9.5571e-05	0.0234575	small integral membrane protein 5
ENSG00000010318	PHF7	59.2862	-0.970069	0.250649	0.000108734	0.0251425	PHD finger protein 7
ENSG00000092439	TRPM7	521.188	-0.670104	0.173226	0.000109557	0.0251425	transient receptor potential cation channel, subfamily M, member 7
ENSG00000144724	PTPRG	198.219	-0.553505	0.142808	0.000106245	0.0251425	protein tyrosine phosphatase, receptor type, G
ENSG00000167371	PRRT2	24.1758	-1.62308	0.419169	0.000107883	0.0251425	proline-rich transmembrane protein 2
ENSG00000204291	COL15A1	10.8562	-2.046	0.529132	0.000110316	0.0251425	collagen, type XV, alpha 1
ENSG00000124813	RUNX2	13.8698	-1.72129	0.445985	0.000113605	0.0255275	runt-related transcription factor 2
ENSG00000004468	CD38	50.7978	-1.43747	0.374471	0.000123703	0.0263142	CD38 molecule
ENSG00000054803	CBLN4	30.8658	-1.70382	0.443673	0.000122904	0.0263142	cerebellin 4 precursor
ENSG00000134042	MRO	31.0673	-1.60435	0.417815	0.000123103	0.0263142	maestro
ENSG00000146151	HMGCLL1	7.90157	-2.16901	0.56806	0.000134385	0.0278439	3-hydroxymethyl-3-methylglutaryl-CoA lyase-like 1
ENSG00000272658	LTB4R2	56.8945	-1.66026	0.434577	0.000133229	0.0278439	Leukotriene B4 receptor 2
ENSG00000183908	LRRC55	52.337	-2.17877	0.574866	0.000150617	0.030417	leucine rich repeat containing 55
ENSG00000197601	FAR1	84.9793	-0.96862	0.255368	0.000148815	0.030417	fatty acyl CoA reductase 1
ENSG00000100101	NOL12	78.0033	-0.94268	0.249071	0.000153841	0.0306798	nucleolar protein 12
ENSG00000196313	POM121	449.998	-0.65468	0.173198	0.000156857	0.030895	POM121 transmembrane nucleoporin
ENSG00000067048	DDX3Y	86.8312	3.40441	0.903538	0.000164647	0.0320339	DEAD (Asp-Glu-Ala-Asp) box helicase 3, Y-linked
ENSG00000011454	RABGAP1	191.51	-0.6657	0.177348	0.000174282	0.0324794	RAB GTPase activating protein 1
ENSG00000117020	AKT3	63.3321	-1.09541	0.291917	0.000175105	0.0324794	v-akt murine thymoma viral oncogene homolog 3
ENSG00000127948	POR	4590.15	0.504711	0.134604	0.000177116	0.0324794	P450 (cytochrome) oxidoreductase
ENSG00000169313	P2RY12	10.6524	-1.71746	0.45762	0.000174713	0.0324794	purinergic receptor P2Y, G-protein coupled, 12
ENSG00000171657	GPR82	8.83644	-1.80169	0.479386	0.000171046	0.0324794	G protein-coupled receptor 82
ENSG00000185829	ARL17A	85.8008	-1.15376	0.308829	0.000187045	0.0335294	ADP-ribosylation factor-like 17A
ENSG00000189184	PCDH18	37.7621	-1.40106	0.375021	0.000186998	0.0335294	protocadherin 18
ENSG00000175538	KCNE3	44.3395	-1.08901	0.291831	0.000190223	0.0337203	potassium voltage-gated channel, Isk-related family, member 3
ENSG00000183718	TRIM52	93.1258	-1.01331	0.271944	0.000194407	0.0340831	tripartite motif containing 52
ENSG00000188277	C15orf62	40.2706	-1.37198	0.368789	0.000199035	0.0345153	chromosome 15 open reading frame 62
ENSG00000127329	PTPRB	346.035	-0.942612	0.253867	0.000204799	0.035133	protein tyrosine phosphatase, receptor type, B
ENSG00000168785	TSPAN5	16.2885	-1.53941	0.415485	0.000211315	0.0358651	tetraspanin 5
ENSG00000088992	TESC	13.9239	-1.56803	0.424943	0.000224273	0.0361186	tescalcin
ENSG00000108474	PIGL	101.554	-0.819623	0.22185	0.000220325	0.0361186	phosphatidylinositol glycan anchor biosynthesis, class L
ENSG00000117983	MUC5B	47.8444	-2.23236	0.604011	0.000219115	0.0361186	mucin 5B, oligomeric mucus/gel-forming
ENSG00000135870	RC3H1	268.358	-0.498138	0.134826	0.000220162	0.0361186	ring finger and CCCH-type domains 1
ENSG00000170949	ZNF160	165.553	-0.834349	0.226026	0.000223031	0.0361186	zinc finger protein 160
ENSG00000186174	BCL9L	233.806	-0.975334	0.264491	0.000226392	0.0361186	B-cell CLL/lymphoma 9-like
ENSG00000103313	MEFV	16.5682	-1.62344	0.440652	0.000229454	0.0362446	Mediterranean fever
ENSG00000025708	TYMP	1205.92	0.746486	0.203317	0.000241087	0.0362556	thymidine phosphorylase
ENSG00000106012	IQCE	82.5838	-0.812524	0.221182	0.000239194	0.0362556	IQ motif containing E
ENSG00000108797	CNTNAP1	20.467	-1.49746	0.407982	0.000242176	0.0362556	contactin associated protein 1
ENSG00000141522	ARHGDIA	1356.45	0.457121	0.124376	0.000237563	0.0362556	Rho GDP dissociation inhibitor (GDI) alpha
ENSG00000161664	ASB16	7.82672	-1.51045	0.411639	0.000243158	0.0362556	ankyrin repeat and SOCS box containing 16
ENSG00000169193	CCDC126	61.6715	-1.07376	0.291945	0.000235117	0.0362556	coiled-coil domain containing 126
ENSG00000206150	RNASE13	6.31915	-1.85435	0.505862	0.000246631	0.0364329	ribonuclease, RNase A family, 13 (non-active)
ENSG00000156876	SASS6	24.3438	-1.33576	0.36529	0.000255482	0.0369887	spindle assembly 6 homolog (C. elegans)
ENSG00000164941	INTS8	115.295	-0.6442	0.176371	0.000259668	0.0369887	integrator complex subunit 8
ENSG00000198718	FAM179B	114.741	-0.795866	0.217847	0.000258868	0.0369887	family with sequence similarity 179, member B
ENSG00000204856	FAM216A	25.8269	-1.01228	0.276675	0.000253478	0.0369887	family with sequence similarity 216, member A
ENSG00000153246	PLA2R1	26.4527	-1.38461	0.380422	0.000272976	0.0382022	phospholipase A2 receptor 1, 180kDa
ENSG00000185883	ATP6V0C	746.385	0.465844	0.12829	0.000282118	0.0389222	ATPase, H+ transporting, lysosomal 16kDa, V0 subunit c
ENSG00000241553	ARPC4	606.765	0.370369	0.102019	0.000283	0.0389222	actin related protein 2/3 complex, subunit 4, 20kDa
ENSG00000115109	EPB41L5	565.009	-0.438792	0.121428	0.000301973	0.0405046	erythrocyte membrane protein band 4.1 like 5
ENSG00000118690	ARMC2	6.24173	-1.59692	0.442395	0.000306531	0.0405046	armadillo repeat containing 2
ENSG00000139220	PPFIA2	9.6105	-1.81939	0.504244	0.000308378	0.0405046	protein tyrosine phosphatase, receptor type, f polypeptide (PTPRF), interacting protein (liprin), alpha 2
ENSG00000144488	ESPNL	44.6799	-1.40342	0.388825	0.000306908	0.0405046	espin-like
ENSG00000149289	ZC3H12C	169.352	-0.808446	0.223553	0.000298778	0.0405046	zinc finger CCCH-type containing 12C
ENSG00000206503	HLA-A	3830.96	0.579657	0.160703	0.000309738	0.0405046	major histocompatibility complex, class I, A
ENSG00000141580	WDR45B	498.075	0.357074	0.0992515	0.000321075	0.040735	WD repeat domain 45B
ENSG00000182580	EPHB3	21.0703	-1.2153	0.33744	0.000316365	0.040735	EPH receptor B3
ENSG00000186714	CCDC73	11.5558	-1.58361	0.440698	0.000326388	0.040735	coiled-coil domain containing 73
ENSG00000188033	ZNF490	33.2485	-1.91327	0.532148	0.000323926	0.040735	zinc finger protein 490
ENSG00000248383	PCDHAC1	7.86948	-2.15666	0.600228	0.00032682	0.040735	protocadherin alpha subfamily C, 1
ENSG00000258941	RP11-407N17.3	146.18	-1.73944	0.483414	0.000320377	0.040735	cTAGE family member 5 isoform 4
ENSG00000123989	CHPF	892.236	0.514547	0.143294	0.00032961	0.040764	chondroitin polymerizing factor
ENSG00000137265	IRF4	12.9683	-1.6391	0.456723	0.000332163	0.040764	interferon regulatory factor 4
ENSG00000066827	ZFAT	48.7918	-1.45163	0.404871	0.000336527	0.0409843	zinc finger and AT hook domain containing
ENSG00000130176	CNN1	21.2411	-2.6619	0.74319	0.000341336	0.0412551	calponin 1, basic, smooth muscle
ENSG00000171119	NRTN	124.908	0.819964	0.229142	0.000345687	0.0414669	neurturin
ENSG00000104974	LILRA1	16.0423	-1.63561	0.457997	0.000355312	0.0416812	leukocyte immunoglobulin-like receptor, subfamily A (with TM domain), member 1
ENSG00000117410	ATP6V0B	671.955	0.45897	0.128495	0.000354407	0.0416812	ATPase, H+ transporting, lysosomal 21kDa, V0 subunit b
ENSG00000135373	EHF	17.2325	-1.49126	0.417198	0.000350926	0.0416812	ets homologous factor
ENSG00000188732	FAM221A	93.724	-0.75778	0.212392	0.000359951	0.0419172	family with sequence similarity 221, member A
ENSG00000172366	FAM195A	722.82	0.502859	0.141128	0.000366439	0.0423636	family with sequence similarity 195, member A
ENSG00000128052	KDR	475.118	-0.977989	0.274697	0.000370507	0.0425257	kinase insert domain receptor (a type III receptor tyrosine kinase)
ENSG00000212993	POU5F1B	8.02888	-2.17721	0.612064	0.000374892	0.0427216	POU class 5 homeobox 1B
ENSG00000139725	RHOF	44.1587	-1.49091	0.419488	0.000379263	0.0429132	ras homolog family member F (in filopodia)
ENSG00000011405	PIK3C2A	327.925	-0.561156	0.158159	0.000388098	0.042998	phosphatidylinositol-4-phosphate 3-kinase, catalytic subunit type 2 alpha
ENSG00000127863	TNFRSF19	37.2701	-1.19683	0.337304	0.000387815	0.042998	tumor necrosis factor receptor superfamily, member 19
ENSG00000083828	ZNF586	26.8874	-1.0041	0.28346	0.00039667	0.0435724	zinc finger protein 586
ENSG00000165449	SLC16A9	25.5793	-1.57041	0.44377	0.000401961	0.0435724	solute carrier family 16, member 9
ENSG00000197162	ZNF785	78.1976	-1.01241	0.286351	0.000406938	0.0435724	zinc finger protein 785
ENSG00000198300	PEG3	161.066	-0.896131	0.253434	0.000406299	0.0435724	paternally expressed 3
ENSG00000166377	ATP9B	142.052	-0.743102	0.210334	0.000410934	0.0437069	ATPase, class II, type 9B
ENSG00000105877	DNAH11	8.46364	-1.96978	0.558273	0.000418182	0.043715	dynein, axonemal, heavy chain 11
ENSG00000105974	CAV1	177.686	-0.845488	0.240253	0.000432931	0.043715	caveolin 1, caveolae protein, 22kDa
ENSG00000113532	ST8SIA4	42.1149	-1.35813	0.385665	0.000429082	0.043715	ST8 alpha-N-acetyl-neuraminide alpha-2,8-sialyltransferase 4
ENSG00000129534	MIS18BP1	54.9303	-1.08915	0.309229	0.000428081	0.043715	MIS18 binding protein 1
ENSG00000163513	TGFBR2	580.971	-0.708254	0.200949	0.0004242	0.043715	transforming growth factor, beta receptor II (70/80kDa)
ENSG00000204172	AGAP10	236.286	-1.25809	0.357272	0.000429315	0.043715	ArfGAP with GTPase domain, ankyrin repeat and PH domain 10
ENSG00000205250	E2F4	200.926	-0.502339	0.142719	0.000431886	0.043715	E2F transcription factor 4, p107/p130-binding
ENSG00000163749	CCDC158	27.5741	-1.54797	0.440288	0.00043842	0.0439891	coiled-coil domain containing 158
ENSG00000198342	ZNF442	10.456	-1.38461	0.394008	0.00044116	0.0439891	zinc finger protein 442
ENSG00000056277	ZNF280C	20.0189	-1.1391	0.324514	0.000447811	0.044261	zinc finger protein 280C
ENSG00000070759	TESK2	108.812	-0.670324	0.191018	0.000449435	0.044261	testis-specific kinase 2
ENSG00000102755	FLT1	138.381	-1.27183	0.364749	0.000488708	0.0457689	fms-related tyrosine kinase 1
ENSG00000103479	RBL2	1089.16	-0.520281	0.14917	0.000486941	0.0457689	retinoblastoma-like 2 (p130)
ENSG00000107854	TNKS2	365.122	-0.43162	0.124041	0.000502041	0.0457689	tankyrase, TRF1-interacting ankyrin-related ADP-ribose polymerase 2
ENSG00000111817	DSE	128.805	-0.882109	0.253389	0.000499086	0.0457689	dermatan sulfate epimerase
ENSG00000130522	JUND	1429.65	0.80102	0.229944	0.000494831	0.0457689	jun D proto-oncogene
ENSG00000138686	BBS7	25.3311	-1.18299	0.338543	0.000475219	0.0457689	Bardet-Biedl syndrome 7
ENSG00000142910	TINAGL1	285.231	-0.997862	0.286467	0.00049521	0.0457689	tubulointerstitial nephritis antigen-like 1
ENSG00000144959	NCEH1	45.0729	-1.10611	0.316668	0.000477726	0.0457689	neutral cholesterol ester hydrolase 1
ENSG00000146006	LRRTM2	7.57414	-1.63399	0.469079	0.000495079	0.0457689	leucine rich repeat transmembrane neuronal 2
ENSG00000149050	ZNF214	14.1739	-1.42656	0.40872	0.000482458	0.0457689	zinc finger protein 214
ENSG00000151617	EDNRA	28.1004	-1.29642	0.372436	0.000499673	0.0457689	endothelin receptor type A
ENSG00000163431	LMOD1	37.6493	-2.03181	0.582088	0.000482018	0.0457689	leiomodin 1 (smooth muscle)
ENSG00000064989	CALCRL	115.508	-1.21257	0.349293	0.000517574	0.0459355	calcitonin receptor-like
ENSG00000089693	MLF2	1842.82	0.350982	0.101092	0.000516772	0.0459355	myeloid leukemia factor 2
ENSG00000112078	KCTD20	573.313	-0.370456	0.106725	0.000518264	0.0459355	potassium channel tetramerization domain containing 20
ENSG00000113356	POLR3G	22.7003	-1.1229	0.323123	0.00051055	0.0459355	polymerase (RNA) III (DNA directed) polypeptide G (32kD)
ENSG00000124571	XPO5	135.305	-0.771266	0.221843	0.000507761	0.0459355	exportin 5
ENSG00000077942	FBLN1	125.905	-1.44473	0.416837	0.000528404	0.0463195	fibulin 1
ENSG00000100368	CSF2RB	54.5167	-1.34049	0.38676	0.00052836	0.0463195	colony stimulating factor 2 receptor, beta, low-affinity (granulocyte-macrophage)
ENSG00000227124	ZNF717	33.4424	-1.07698	0.310962	0.000533474	0.0465084	zinc finger protein 717
ENSG00000108389	MTMR4	1156.65	-0.46071	0.133599	0.000563787	0.046664	myotubularin related protein 4
ENSG00000111665	CDCA3	12.8107	-1.3001	0.377109	0.000565679	0.046664	cell division cycle associated 3
ENSG00000120093	HOXB3	53.5348	-1.09334	0.317102	0.000564919	0.046664	homeobox B3
ENSG00000136098	NEK3	60.287	-0.939327	0.272182	0.00055832	0.046664	NIMA-related kinase 3
ENSG00000153107	ANAPC1	171.415	-0.532543	0.154138	0.000550319	0.046664	anaphase promoting complex subunit 1
ENSG00000168005	C11orf84	28.8373	-1.01437	0.29373	0.000553559	0.046664	chromosome 11 open reading frame 84
ENSG00000173517	PEAK1	184.069	-0.699413	0.202883	0.000566081	0.046664	pseudopodium-enriched atypical kinase 1
ENSG00000182795	C1orf116	9.84942	-1.66629	0.48235	0.000551264	0.046664	chromosome 1 open reading frame 116
ENSG00000185070	FLRT2	62.4004	-1.16583	0.337789	0.000557776	0.046664	fibronectin leucine rich transmembrane protein 2
ENSG00000186235	AC016757.3	5.63171	-2.07115	0.601147	0.000570357	0.046664	Protein LOC151174
ENSG00000196600	SLC22A25	312.046	-0.731081	0.212141	0.000568526	0.046664	solute carrier family 22, member 25
ENSG00000234719	RP11-166B2.1	14.728	-1.34731	0.390484	0.000559863	0.046664	Putative NPIP-like protein LOC729978
ENSG00000159082	SYNJ1	97.8911	-0.817121	0.23731	0.000574753	0.0467837	synaptojanin 1
ENSG00000204084	INPP5B	277.195	-0.569107	0.165376	0.000578939	0.0468852	inositol polyphosphate-5-phosphatase, 75kDa
ENSG00000213901	SLC23A3	73.8254	-1.28602	0.374058	0.000585951	0.0472134	solute carrier family 23, member 3
ENSG00000008517	IL32	1530.29	1.20419	0.350764	0.000596868	0.0478514	interleukin 32
ENSG00000110077	MS4A6A	574.448	-0.730111	0.212819	0.000602099	0.0480294	membrane-spanning 4-domains, subfamily A, member 6A
ENSG00000089123	TASP1	30.621	-1.03848	0.303204	0.000614743	0.0483134	taspase, threonine aspartase, 1
ENSG00000179776	CDH5	273.675	-0.891084	0.260008	0.000609979	0.0483134	cadherin 5, type 2 (vascular endothelium)
ENSG00000179909	ZNF154	31.7977	-1.31727	0.384581	0.000614333	0.0483134	zinc finger protein 154
ENSG00000183876	ARSI	8.03391	-1.57147	0.459776	0.000631054	0.0493521	arylsulfatase family, member I
ENSG00000003137	CYP26B1	18.1124	-1.6321	0.479442	0.000663671	0.0502388	cytochrome P450, family 26, subfamily B, polypeptide 1
ENSG00000039560	RAI14	386.767	-0.498972	0.146508	0.000659809	0.0502388	retinoic acid induced 14
ENSG00000128591	FLNC	18.2457	-1.94206	0.571411	0.00067703	0.0502388	filamin C, gamma
ENSG00000130943	PKDREJ	9.10818	-1.91614	0.563233	0.00066886	0.0502388	polycystin (PKD) family receptor for egg jelly
ENSG00000161055	SCGB3A1	18.1361	-2.21937	0.652903	0.000675757	0.0502388	secretoglobin, family 3A, member 1
ENSG00000180881	CAPS2	18.3204	-1.30966	0.384404	0.000656867	0.0502388	calcyphosine 2
ENSG00000180938	ZNF572	13.9595	-1.19441	0.351163	0.000670638	0.0502388	zinc finger protein 572
ENSG00000180998	GPR137C	11.084	-1.54123	0.451957	0.00064931	0.0502388	G protein-coupled receptor 137C
ENSG00000183628	DGCR6	169.167	0.876474	0.257843	0.000675682	0.0502388	DiGeorge syndrome critical region gene 6
ENSG00000186260	MKL2	164.322	-1.04015	0.305308	0.000657092	0.0502388	MKL/myocardin-like 2
ENSG00000203965	EFCAB7	19.1914	-1.29121	0.378633	0.000649164	0.0502388	EF-hand calcium binding domain 7
ENSG00000137343	ATAT1	47.615	-0.845203	0.248781	0.000680347	0.0502512	alpha tubulin acetyltransferase 1
ENSG00000153956	CACNA2D1	17.4695	-1.37658	0.405507	0.000687031	0.0504814	calcium channel, voltage-dependent, alpha 2/delta subunit 1
ENSG00000165996	PTPLA	7.1938	-1.64906	0.485932	0.000689793	0.0504814	protein tyrosine phosphatase-like (proline instead of catalytic arginine), member A
ENSG00000102349	KLF8	30.5746	-1.27701	0.376557	0.000695687	0.0505092	Kruppel-like factor 8
ENSG00000111319	SCNN1A	61.2539	-0.866345	0.25556	0.000698963	0.0505092	sodium channel, non-voltage-gated 1 alpha subunit
ENSG00000130748	TMEM160	238.723	0.567902	0.167537	0.000699669	0.0505092	transmembrane protein 160
ENSG00000135637	CCDC142	121.24	-0.823032	0.243073	0.000709321	0.0505399	coiled-coil domain containing 142
ENSG00000171159	C9orf16	178.371	0.613455	0.181182	0.000709599	0.0505399	chromosome 9 open reading frame 16
ENSG00000182168	UNC5C	24.6367	-1.47628	0.435991	0.000709088	0.0505399	unc-5 homolog C (C. elegans)
ENSG00000153933	DGKE	103.395	-0.867024	0.256191	0.000713628	0.0505535	diacylglycerol kinase, epsilon 64kDa
ENSG00000168615	ADAM9	141.461	-0.925513	0.273551	0.000716127	0.0505535	ADAM metallopeptidase domain 9
ENSG00000153666	GOLGA8I	37.0458	-1.17594	0.347955	0.000725955	0.050979	golgin A8 family, member I
ENSG00000164404	GDF9	5.86662	-1.94661	0.576362	0.000731741	0.050979	growth differentiation factor 9
ENSG00000214655	ZSWIM8	1077.1	-0.496068	0.146856	0.000730362	0.050979	zinc finger, SWIM-type containing 8
ENSG00000171631	P2RY6	18.0448	-1.57831	0.467961	0.000744262	0.0516259	pyrimidinergic receptor P2Y, G-protein coupled, 6
ENSG00000187243	MAGED4B	9.28951	-1.85393	0.549957	0.000748816	0.0517169	melanoma antigen family D, 4B
ENSG00000100393	EP300	455.202	-0.594405	0.176395	0.00075239	0.0517398	E1A binding protein p300
ENSG00000167766	ZNF83	110.731	-0.95735	0.284376	0.000761301	0.0521279	zinc finger protein 83
ENSG00000119321	FKBP15	243.704	-0.689375	0.205036	0.000773208	0.0527169	FK506 binding protein 15, 133kDa
ENSG00000079102	RUNX1T1	25.9121	-1.21683	0.362151	0.000779376	0.0527486	runt-related transcription factor 1; translocated to, 1 (cyclin D-related)
ENSG00000118046	STK11	747.754	0.366053	0.108981	0.000782581	0.0527486	serine/threonine kinase 11
ENSG00000155066	PROM2	15.1536	-1.4507	0.431945	0.000783592	0.0527486	prominin 2
ENSG00000032444	PNPLA6	564.138	0.368069	0.109716	0.000794381	0.0530563	patatin-like phospholipase domain containing 6
ENSG00000151849	CENPJ	30.5738	-1.09225	0.325598	0.000794814	0.0530563	centromere protein J
ENSG00000145362	ANK2	27.6911	-1.05644	0.315462	0.000811383	0.0539189	ankyrin 2, neuronal
ENSG00000243156	MICAL3	470.991	-0.840044	0.250922	0.000814496	0.0539189	microtubule associated monooxygenase, calponin and LIM domain containing 3
ENSG00000185864	NPIPB4	415.055	-0.829861	0.248347	0.000833142	0.0547079	nuclear pore complex interacting protein family, member B4
ENSG00000215126	CBWD7	65.3448	-0.769781	0.23037	0.000833272	0.0547079	COBW domain containing 7
ENSG00000161405	IKZF3	9.16425	-1.40253	0.419899	0.000837262	0.0547446	IKAROS family zinc finger 3 (Aiolos)
ENSG00000102908	NFAT5	335.712	-0.950115	0.285012	0.000857308	0.0555996	nuclear factor of activated T-cells 5, tonicity-responsive
ENSG00000145246	ATP10D	79.867	-0.963799	0.289103	0.00085683	0.0555996	ATPase, class V, type 10D
ENSG00000111605	CPSF6	253.39	-0.645345	0.193838	0.000870624	0.0561552	cleavage and polyadenylation specific factor 6, 68kDa
ENSG00000197872	FAM49A	53.2093	-1.20036	0.360623	0.000872915	0.0561552	family with sequence similarity 49, member A
ENSG00000165819	METTL3	196.193	-0.615004	0.185084	0.000891086	0.0568715	methyltransferase like 3
ENSG00000172845	SP3	447.038	-0.413476	0.124436	0.00089118	0.0568715	Sp3 transcription factor
ENSG00000121022	COPS5	403.019	-0.314001	0.0946517	0.000908462	0.0575143	COP9 signalosome subunit 5
ENSG00000167700	MFSD3	419.927	0.532812	0.160665	0.000912238	0.0575251	major facilitator superfamily domain containing 3
ENSG00000168268	NT5DC2	46.9675	-0.852138	0.25708	0.000917477	0.0576277	5'-nucleotidase domain containing 2
ENSG00000231925	TAPBP	1685.18	0.459852	0.138895	0.000930313	0.0582047	TAP binding protein (tapasin)
ENSG00000068489	PRR11	12.5214	-1.38632	0.419053	0.000938878	0.0584138	proline rich 11
ENSG00000103316	CRYM	93.2564	0.736375	0.222631	0.000940977	0.0584138	crystallin, mu
ENSG00000132485	ZRANB2	461.128	-0.474448	0.143533	0.000948071	0.0586261	zinc finger, RAN-binding domain containing 2
ENSG00000075151	EIF4G3	237.347	-0.513959	0.155721	0.000965089	0.0587673	eukaryotic translation initiation factor 4 gamma, 3
ENSG00000167792	NDUFV1	1926.41	0.361575	0.109523	0.000962161	0.0587673	NADH dehydrogenase (ubiquinone) flavoprotein 1, 51kDa
ENSG00000188167	TMPPE	13.3055	-1.45793	0.441591	0.000961579	0.0587673	transmembrane protein with metallophosphoesterase domain
ENSG00000143127	ITGA10	32.0624	-1.41112	0.428176	0.000981926	0.0595652	integrin, alpha 10
ENSG00000172403	SYNPO2	110.995	-1.10246	0.334743	0.000989688	0.0598086	synaptopodin 2
ENSG00000106397	PLOD3	419.93	0.395037	0.120012	0.000996066	0.0598619	procollagen-lysine, 2-oxoglutarate 5-dioxygenase 3
ENSG00000134897	BIVM	325.753	-0.406229	0.123434	0.000998073	0.0598619	basic, immunoglobulin-like variable motif containing
ENSG00000187260	WDR86	23.383	-1.45753	0.443021	0.00100196	0.0598697	WD repeat domain 86
ENSG00000140575	IQGAP1	283.656	-0.878925	0.267303	0.00100857	0.0600401	IQ motif containing GTPase activating protein 1
ENSG00000005486	RHBDD2	437.204	0.415147	0.126436	0.00102543	0.0601668	rhomboid domain containing 2
ENSG00000185591	SP1	443.898	-0.380313	0.11583	0.00102579	0.0601668	Sp1 transcription factor
ENSG00000188603	CLN3	259.994	0.575594	0.175233	0.00102077	0.0601668	ceroid-lipofuscinosis, neuronal 3
ENSG00000270181	BIVM-ERCC5	94.0361	-1.80702	0.54988	0.00101548	0.0601668	BIVM-ERCC5 readthrough
ENSG00000002933	TMEM176A	6967.13	0.431625	0.131569	0.00103588	0.0603152	transmembrane protein 176A
ENSG00000092295	TGM1	9.84226	-1.49598	0.45596	0.00103457	0.0603152	transglutaminase 1
ENSG00000110172	CHORDC1	148.295	-0.545483	0.166387	0.001044	0.0605674	cysteine and histidine-rich domain (CHORD) containing 1
ENSG00000111224	PARP11	43.4641	-0.909254	0.277754	0.00106186	0.0611587	poly (ADP-ribose) polymerase family, member 11
ENSG00000184557	SOCS3	94.8147	1.50575	0.459836	0.00105832	0.0611587	suppressor of cytokine signaling 3
ENSG00000137501	SYTL2	48.0574	-1.0006	0.305791	0.00106722	0.0612461	synaptotagmin-like 2
ENSG00000028528	SNX1	883.306	-0.282202	0.0863433	0.00108166	0.0613152	sorting nexin 1
ENSG00000083844	ZNF264	47.3882	-1.18462	0.362567	0.00108577	0.0613152	zinc finger protein 264
ENSG00000101811	CSTF2	33.2487	-0.904489	0.276549	0.00107307	0.0613152	cleavage stimulation factor, 3' pre-RNA, subunit 2, 64kDa
ENSG00000105404	RABAC1	742.731	0.551006	0.16868	0.00108853	0.0613152	Rab acceptor 1 (prenylated)
ENSG00000124145	SDC4	1912.62	0.51308	0.157106	0.00109148	0.0613152	syndecan 4
ENSG00000132669	RIN2	113.221	-0.632317	0.193446	0.00108041	0.0613152	Ras and Rab interactor 2
ENSG00000114933	INO80D	201.747	-0.652907	0.200219	0.00111032	0.061965	INO80 complex subunit D
ENSG00000182327	GLTPD2	1236.98	0.601876	0.184577	0.00111082	0.061965	glycolipid transfer protein domain containing 2
ENSG00000145287	PLAC8	71.468	-1.00344	0.307896	0.00111793	0.0621445	placenta-specific 8
ENSG00000135404	CD63	2799.34	0.370877	0.113889	0.00112809	0.0624913	CD63 molecule
ENSG00000003987	MTMR7	14.1526	-1.12781	0.346973	0.0011523	0.0636117	myotubularin related protein 7
ENSG00000179873	NLRP11	10.46	-1.34574	0.414892	0.00118032	0.0644893	NLR family, pyrin domain containing 11
ENSG00000139899	CBLN3	55.0579	-1.29444	0.399665	0.00120025	0.0653278	cerebellin 3 precursor
ENSG00000185684	EP400NL	153.747	-0.919815	0.284072	0.00120386	0.0653278	EP400 N-terminal like
ENSG00000157833	GAREML	5.84909	-1.93111	0.596877	0.00121488	0.0657025	GRB2 associated, regulator of MAPK1-like
ENSG00000087903	RFX2	24.062	-1.16381	0.360418	0.00124201	0.0665733	regulatory factor X, 2 (influences HLA class II expression)
ENSG00000112419	PHACTR2	202.316	-0.683646	0.211666	0.00123863	0.0665733	phosphatase and actin regulator 2
ENSG00000163867	ZMYM6	143.494	-0.566156	0.175351	0.0012435	0.0665733	zinc finger, MYM-type 6
ENSG00000114739	ACVR2B	191.602	-0.655924	0.203443	0.00126362	0.0672538	activin A receptor, type IIB
ENSG00000156475	PPP2R2B	6.61184	-1.46988	0.455935	0.00126465	0.0672538	protein phosphatase 2, regulatory subunit B, beta
ENSG00000096433	ITPR3	67.246	-0.989342	0.307414	0.00128964	0.0676665	inositol 1,4,5-trisphosphate receptor, type 3
ENSG00000125266	EFNB2	100.936	-1.08712	0.337582	0.00128047	0.0676665	ephrin-B2
ENSG00000133687	TMTC1	97.7447	-0.930826	0.289337	0.00129493	0.0676665	transmembrane and tetratricopeptide repeat containing 1
ENSG00000138829	FBN2	10.7098	-1.74606	0.542288	0.00128276	0.0676665	fibrillin 2
ENSG00000169504	CLIC4	742.775	-0.392897	0.122129	0.00129509	0.0676665	chloride intracellular channel 4
ENSG00000173914	RBM4B	107.917	-0.559176	0.173848	0.00129785	0.0676665	RNA binding motif protein 4B
ENSG00000110583	NAA40	92.6928	-0.64972	0.202319	0.00132109	0.0677708	N(alpha)-acetyltransferase 40, NatD catalytic subunit
ENSG00000127993	RBM48	89.6765	-0.732986	0.228219	0.0013192	0.0677708	RNA binding motif protein 48
ENSG00000174943	KCTD13	88.6116	-0.78837	0.245213	0.00130428	0.0677708	potassium channel tetramerization domain containing 13
ENSG00000198785	GRIN3A	9.36671	-1.3998	0.435796	0.00131791	0.0677708	glutamate receptor, ionotropic, N-methyl-D-aspartate 3A
ENSG00000112167	SAYSD1	92.3962	0.528854	0.164753	0.00132744	0.0678779	SAYSVFN motif domain containing 1
ENSG00000137504	CREBZF	570.948	-0.430822	0.134256	0.00133217	0.0679021	CREB/ATF bZIP transcription factor
ENSG00000060566	CREB3L3	1337.61	0.499416	0.156151	0.0013824	0.0685766	cAMP responsive element binding protein 3-like 3
ENSG00000144218	AFF3	53.7269	-1.02242	0.319489	0.00137342	0.0685766	AF4/FMR2 family, member 3
ENSG00000146083	RNF44	240.154	-0.421291	0.13164	0.00137276	0.0685766	ring finger protein 44
ENSG00000164100	NDST3	21.3681	-1.45313	0.453468	0.0013531	0.0685766	N-deacetylase/N-sulfotransferase (heparan glucosaminyl) 3
ENSG00000169429	IL8	14.4204	2.0173	0.630074	0.00136626	0.0685766	interleukin 8
ENSG00000181631	P2RY13	50.4669	-1.07406	0.335859	0.00138408	0.0685766	purinergic receptor P2Y, G-protein coupled, 13
ENSG00000198003	CCDC151	7.59849	-1.54646	0.48272	0.00135707	0.0685766	coiled-coil domain containing 151
ENSG00000198435	NRARP	29.9182	-1.17146	0.365898	0.00136664	0.0685766	NOTCH-regulated ankyrin repeat protein
ENSG00000255423	EBLN2	12.9508	-1.22625	0.38344	0.00138373	0.0685766	endogenous Bornavirus-like nucleoprotein 2
ENSG00000101342	TLDC2	9.18911	-1.44513	0.452346	0.00139949	0.0691253	TBC/LysM-associated domain containing 2
ENSG00000079387	SENP1	58.5572	-0.667927	0.209263	0.00141388	0.0696204	SUMO1/sentrin specific peptidase 1
ENSG00000095015	MAP3K1	140.35	-0.662758	0.208313	0.00146488	0.0702299	mitogen-activated protein kinase kinase kinase 1, E3 ubiquitin protein ligase
ENSG00000110536	PTPMT1	180.727	0.49162	0.154471	0.00145956	0.0702299	protein tyrosine phosphatase, mitochondrial 1
ENSG00000138442	WDR12	171.821	-0.525603	0.165055	0.00145054	0.0702299	WD repeat domain 12
ENSG00000143797	MBOAT2	23.9198	-1.00455	0.315323	0.00144366	0.0702299	membrane bound O-acyltransferase domain containing 2
ENSG00000157450	RNF111	136.329	-0.625133	0.196217	0.00144291	0.0702299	ring finger protein 111
ENSG00000160460	SPTBN4	24.0516	-1.20507	0.378485	0.00145284	0.0702299	spectrin, beta, non-erythrocytic 4
ENSG00000166923	GREM1	23.368	-1.79013	0.56256	0.0014621	0.0702299	gremlin 1, DAN family BMP antagonist
ENSG00000203710	CR1	65.6493	-1.29524	0.407135	0.00146588	0.0702299	complement component (3b/4b) receptor 1 (Knops blood group)
ENSG00000003400	CASP10	125.248	-0.659044	0.20741	0.00148553	0.0709586	caspase 10, apoptosis-related cysteine peptidase
ENSG00000165288	BRWD3	121.448	-0.668588	0.210631	0.00150246	0.0715529	bromodomain and WD repeat domain containing 3
ENSG00000004838	ZMYND10	12.0933	-1.29655	0.40879	0.00151564	0.0718876	zinc finger, MYND-type containing 10
ENSG00000101447	FAM83D	33.9125	-1.00224	0.316053	0.0015185	0.0718876	family with sequence similarity 83, member D
ENSG00000133460	SLC2A11	98.6274	-0.736774	0.232604	0.0015375	0.0725717	solute carrier family 2 (facilitated glucose transporter), member 11
ENSG00000088854	C20orf194	84.4485	-0.844352	0.266754	0.0015493	0.0726987	chromosome 20 open reading frame 194
ENSG00000183060	LYSMD4	48.752	0.956076	0.302231	0.00155938	0.072957	LysM, putative peptidoglycan-binding, domain containing 4
ENSG00000112276	BVES	5.9786	-1.69136	0.534995	0.00156988	0.0732112	blood vessel epicardial substance
ENSG00000173889	PHC3	334.518	-0.568363	0.179874	0.00157889	0.0732112	polyhomeotic homolog 3 (Drosophila)
ENSG00000179397	C1orf101	8.43003	-1.48825	0.471078	0.00158176	0.0732112	chromosome 1 open reading frame 101
ENSG00000197321	SVIL	315.884	-0.538963	0.170612	0.00158317	0.0732112	supervillin
ENSG00000147162	OGT	900.12	-0.519586	0.164577	0.00159344	0.0732616	O-linked N-acetylglucosamine (GlcNAc) transferase
ENSG00000181029	TRAPPC5	503.286	0.564541	0.1789	0.00160155	0.0734226	trafficking protein particle complex 5
ENSG00000100097	LGALS1	727.079	0.579526	0.183926	0.00162791	0.0744173	lectin, galactoside-binding, soluble, 1
ENSG00000064933	PMS1	95.2484	-0.712776	0.226654	0.00166218	0.0749826	PMS1 postmeiotic segregation increased 1 (S. cerevisiae)
ENSG00000115750	TAF1B	31.4899	-1.09865	0.349262	0.00165722	0.0749826	TATA box binding protein (TBP)-associated factor, RNA polymerase I, B, 63kDa
ENSG00000127081	ZNF484	20.3527	-1.11599	0.354807	0.001659	0.0749826	zinc finger protein 484
ENSG00000139567	ACVRL1	73.8397	-1.06623	0.338888	0.00165373	0.0749826	activin A receptor type II-like 1
ENSG00000153976	HS3ST3A1	32.3025	-1.38039	0.438988	0.00166377	0.0749826	heparan sulfate (glucosamine) 3-O-sulfotransferase 3A1
ENSG00000099860	GADD45B	1358.98	0.795885	0.25325	0.00167405	0.0751433	growth arrest and DNA-damage-inducible, beta
ENSG00000111300	NAA25	169.125	-0.568793	0.181191	0.00169416	0.0751433	N(alpha)-acetyltransferase 25, NatB auxiliary subunit
ENSG00000117906	RCN2	119.783	-0.639174	0.20351	0.00168512	0.0751433	reticulocalbin 2, EF-hand calcium binding domain
ENSG00000122591	FAM126A	116.546	-0.68025	0.216658	0.00169095	0.0751433	family with sequence similarity 126, member A
ENSG00000171206	TRIM8	606.38	0.305562	0.0973806	0.00170213	0.0751433	tripartite motif containing 8
ENSG00000177138	FAM9B	17.3159	-1.64125	0.523135	0.00170488	0.0751433	family with sequence similarity 9, member B
ENSG00000180447	GAS1	67.8106	-1.37049	0.436332	0.00168409	0.0751433	growth arrest-specific 1
ENSG00000250479	CHCHD10	1039.48	0.493162	0.157192	0.00170502	0.0751433	coiled-coil-helix-coiled-coil-helix domain containing 10
ENSG00000108639	SYNGR2	612.652	0.447423	0.142688	0.00171457	0.0751492	synaptogyrin 2
ENSG00000173175	ADCY5	99.8511	-1.13584	0.362485	0.00172751	0.0755086	adenylate cyclase 5
ENSG00000171596	NMUR1	19.3214	-1.14356	0.365088	0.0017346	0.0755279	neuromedin U receptor 1
ENSG00000079435	LIPE	16.3415	-1.14001	0.364229	0.00174846	0.0756911	lipase, hormone-sensitive
ENSG00000163734	CXCL3	5.34217	1.9219	0.614112	0.00175066	0.0756911	chemokine (C-X-C motif) ligand 3
ENSG00000137075	RNF38	187.194	-0.615352	0.19679	0.00176633	0.0760254	ring finger protein 38
ENSG00000157214	STEAP2	57.6152	-0.937202	0.299752	0.00176843	0.0760254	STEAP family member 2, metalloreductase
ENSG00000174915	PTDSS2	137.808	0.407853	0.130476	0.00177269	0.0760254	phosphatidylserine synthase 2
ENSG00000105792	C7orf63	52.5309	-0.942301	0.302016	0.00180831	0.0771202	chromosome 7 open reading frame 63
ENSG00000165215	CLDN3	365.576	0.538478	0.172627	0.00181272	0.0771202	claudin 3
ENSG00000100811	YY1	852.497	0.216888	0.0695568	0.00182	0.0771379	YY1 transcription factor
ENSG00000185624	P4HB	13684	0.382071	0.12255	0.0018228	0.0771379	prolyl 4-hydroxylase, beta polypeptide
ENSG00000164296	TIGD6	39.8069	-0.939466	0.301849	0.00185594	0.0777186	tigger transposable element derived 6
ENSG00000185043	CIB1	807.713	0.418877	0.134594	0.0018573	0.0777186	calcium and integrin binding 1 (calmyrin)
ENSG00000188981	MSANTD1	9.37223	-1.64739	0.529307	0.00185602	0.0777186	Myb/SANT-like DNA-binding domain containing 1
ENSG00000198625	MDM4	498.646	-0.489242	0.157233	0.00186088	0.0777186	Mdm4 p53 binding protein homolog (mouse)
ENSG00000141753	IGFBP4	13769.8	0.357404	0.114928	0.00187205	0.0779811	insulin-like growth factor binding protein 4
ENSG00000148634	HERC4	300.16	-0.378241	0.121729	0.00188849	0.0784607	HECT and RLD domain containing E3 ubiquitin protein ligase 4
ENSG00000115840	SLC25A12	25.3474	-0.95808	0.308729	0.00191376	0.0788945	solute carrier family 25 (aspartate/glutamate carrier), member 12
ENSG00000172572	PDE3A	37.4321	-1.08934	0.350986	0.00191138	0.0788945	phosphodiesterase 3A, cGMP-inhibited
ENSG00000102898	NUTF2	269.453	0.386498	0.124619	0.00192593	0.078902	nuclear transport factor 2
ENSG00000105402	NAPA	1110.06	0.304803	0.0982922	0.00192878	0.078902	N-ethylmaleimide-sensitive factor attachment protein, alpha
ENSG00000165841	CYP2C19	785.324	-1.02117	0.329184	0.00192134	0.078902	cytochrome P450, family 2, subfamily C, polypeptide 19
ENSG00000183580	FBXL7	31.8876	-1.13349	0.365634	0.00193471	0.0789421	F-box and leucine-rich repeat protein 7
ENSG00000164619	BMPER	87.7117	-0.965874	0.311949	0.00195984	0.0797636	BMP binding endothelial regulator
ENSG00000011523	CEP68	73.5949	-0.707186	0.229004	0.00201446	0.0799666	centrosomal protein 68kDa
ENSG00000047410	TPR	474.539	-0.475015	0.153699	0.00199786	0.0799666	translocated promoter region, nuclear basket protein
ENSG00000089472	HEPH	26.1136	-1.08478	0.351068	0.00200197	0.0799666	hephaestin
ENSG00000100146	SOX10	10.0972	-1.7175	0.556315	0.00201997	0.0799666	SRY (sex determining region Y)-box 10
ENSG00000101596	SMCHD1	235.353	-0.531198	0.172036	0.00201706	0.0799666	structural maintenance of chromosomes flexible hinge domain containing 1
ENSG00000115159	GPD2	56.1779	-0.78618	0.254352	0.00199541	0.0799666	glycerol-3-phosphate dehydrogenase 2 (mitochondrial)
ENSG00000133392	MYH11	259.886	-1.68305	0.544657	0.00200077	0.0799666	myosin, heavy chain 11, smooth muscle
ENSG00000162664	ZNF326	283.361	-0.457902	0.148052	0.00198244	0.0799666	zinc finger protein 326
ENSG00000232653	GOLGA8N	48.6939	-1.3579	0.439771	0.00201678	0.0799666	golgin A8 family, member N
ENSG00000260272	RP11-20I23.1	12.7658	-1.78641	0.578231	0.00200534	0.0799666	Uncharacterized protein
ENSG00000100605	ITPK1	673.047	0.420024	0.136134	0.00203303	0.0802845	inositol-tetrakisphosphate 1-kinase
ENSG00000010292	NCAPD2	122.3	-0.538341	0.174528	0.00203854	0.0803035	non-SMC condensin I complex, subunit D2
ENSG00000023171	GRAMD1B	27.6991	-1.20484	0.390913	0.00205531	0.0807645	GRAM domain containing 1B
ENSG00000167772	ANGPTL4	747.088	0.810168	0.262936	0.00206142	0.0808057	angiopoietin-like 4
ENSG00000101160	CTSZ	3818.29	0.366771	0.119087	0.00207092	0.0809791	cathepsin Z
ENSG00000180855	ZNF443	30.2886	-0.933617	0.303254	0.00207931	0.0810094	zinc finger protein 443
ENSG00000188227	ZNF793	22.6742	-1.29998	0.422303	0.00208185	0.0810094	zinc finger protein 793
ENSG00000125384	PTGER2	12.0866	-1.26773	0.412055	0.00209374	0.0810766	prostaglandin E receptor 2 (subtype EP2), 53kDa
ENSG00000176720	BOK	1667.58	0.370398	0.120376	0.00209093	0.0810766	BCL2-related ovarian killer
ENSG00000112473	SLC39A7	897.084	0.40935	0.133117	0.00210423	0.081089	solute carrier family 39 (zinc transporter), member 7
ENSG00000108679	LGALS3BP	1272.47	0.478799	0.155942	0.00213794	0.0816389	lectin, galactoside-binding, soluble, 3 binding protein
ENSG00000142484	TM4SF5	823.373	0.512043	0.166694	0.00212802	0.0816389	transmembrane 4 L six family member 5
ENSG00000170382	LRRN2	23.4839	-1.21288	0.395045	0.00213897	0.0816389	leucine rich repeat neuronal 2
ENSG00000102531	FNDC3A	950.997	-0.372722	0.121498	0.00215692	0.0816581	fibronectin type III domain containing 3A
ENSG00000124406	ATP8A1	52.3122	-0.88929	0.289851	0.00215429	0.0816581	ATPase, aminophospholipid transporter (APLT), class I, type 8A, member 1
ENSG00000172167	MTBP	9.67987	-1.26039	0.41091	0.00215994	0.0816581	Mdm2, transformed 3T3 cell double minute 2, p53 binding protein (mouse) binding protein, 104kDa
ENSG00000116661	FBXO2	252.832	0.677451	0.220914	0.00216518	0.0816627	F-box protein 2
ENSG00000002586	CD99	1201.72	0.351296	0.114714	0.00219602	0.0826303	CD99 molecule
ENSG00000128311	TST	4512.94	0.451117	0.1474	0.00220975	0.0829515	thiosulfate sulfurtransferase (rhodanese)
ENSG00000214944	ARHGEF28	171.152	-0.629751	0.205878	0.00222185	0.0832098	Rho guanine nucleotide exchange factor (GEF) 28
ENSG00000081853	PCDHGA2	17.2535	-1.47653	0.483368	0.00225301	0.0832345	protocadherin gamma subfamily A, 2
ENSG00000149541	B3GAT3	228.072	0.413999	0.135501	0.0022482	0.0832345	beta-1,3-glucuronyltransferase 3 (glucuronosyltransferase I)
ENSG00000168061	SAC3D1	86.2217	0.717494	0.234725	0.00223752	0.0832345	SAC3 domain containing 1
ENSG00000178694	NSUN3	52.193	-0.760381	0.2489	0.00225082	0.0832345	NOP2/Sun domain family, member 3
ENSG00000181350	FAM211A	6.30979	-1.39122	0.455307	0.00224647	0.0832345	family with sequence similarity 211, member A
ENSG00000243716	NPIPB5	650.865	-0.755057	0.247189	0.00225381	0.0832345	nuclear pore complex interacting protein family, member B5
ENSG00000186399	GOLGA8R	22.7996	-1.4174	0.464153	0.00226007	0.0832728	golgin A8 family, member R
ENSG00000160799	CCDC12	253.05	0.407288	0.133426	0.00226907	0.0834119	coiled-coil domain containing 12
ENSG00000048991	R3HDM1	104.973	-0.474389	0.155539	0.00228865	0.0836144	R3H domain containing 1
ENSG00000141219	C17orf80	104.26	-0.824956	0.270399	0.00228172	0.0836144	chromosome 17 open reading frame 80
ENSG00000165617	DACT1	34.6466	-1.15053	0.377253	0.0022903	0.0836144	dishevelled-binding antagonist of beta-catenin 1
ENSG00000156218	ADAMTSL3	266.882	-0.492261	0.161526	0.0023071	0.0840352	ADAMTS-like 3
ENSG00000168528	SERINC2	929.792	0.443018	0.145435	0.00231792	0.0842373	serine incorporator 2
ENSG00000080298	RFX3	32.9645	-0.912306	0.299817	0.00234329	0.0843903	regulatory factor X, 3 (influences HLA class II expression)
ENSG00000120162	MOB3B	31.428	-0.822643	0.27031	0.00233973	0.0843903	MOB kinase activator 3B
ENSG00000137312	FLOT1	729.341	0.308914	0.101472	0.0023321	0.0843903	flotillin 1
ENSG00000233276	GPX1	2288.93	0.372716	0.122442	0.00233432	0.0843903	glutathione peroxidase 1
ENSG00000126106	TMEM53	335.475	0.449965	0.148138	0.00238566	0.0857226	transmembrane protein 53
ENSG00000070061	IKBKAP	329.439	-0.353175	0.116466	0.00242591	0.0863975	inhibitor of kappa light polypeptide gene enhancer in B-cells, kinase complex-associated protein
ENSG00000106144	CASP2	91.1988	-0.680687	0.224412	0.00241969	0.0863975	caspase 2, apoptosis-related cysteine peptidase
ENSG00000120327	PCDHB14	20.7806	-1.11022	0.366119	0.00242611	0.0863975	protocadherin beta 14
ENSG00000242732	RGAG4	83.4321	-0.59741	0.197001	0.0024252	0.0863975	retrotransposon gag domain containing 4
ENSG00000121807	CCR2	18.3843	-1.06784	0.352398	0.00244388	0.0868366	chemokine (C-C motif) receptor 2
ENSG00000114812	VIPR1	465.566	-0.552087	0.182443	0.00247756	0.0870989	vasoactive intestinal peptide receptor 1
ENSG00000115649	CNPPD1	492.377	0.32476	0.107327	0.00247896	0.0870989	cyclin Pas1/PHO80 domain containing 1
ENSG00000163568	AIM2	5.31895	-1.84278	0.609261	0.00248947	0.0870989	absent in melanoma 2
ENSG00000166741	NNMT	2841.6	0.953567	0.315138	0.00247921	0.0870989	nicotinamide N-methyltransferase
ENSG00000189164	ZNF527	36.8209	-0.880766	0.291159	0.00248606	0.0870989	zinc finger protein 527
ENSG00000213171	LINGO4	31.4342	-1.24379	0.410899	0.00246994	0.0870989	leucine rich repeat and Ig domain containing 4
ENSG00000225996	AL356356.1	17.3201	-1.47378	0.487199	0.00248635	0.0870989	Protein LOC100996516
ENSG00000196693	ZNF33B	236.684	-0.450771	0.149077	0.00249665	0.0871586	zinc finger protein 33B
ENSG00000024048	UBR2	478.315	-0.368326	0.121848	0.00250414	0.0872293	ubiquitin protein ligase E3 component n-recognin 2
ENSG00000140279	DUOX2	6.66233	-2.15813	0.714256	0.00251516	0.0872716	dual oxidase 2
ENSG00000254415	SIGLEC14	19.3344	-1.408	0.466014	0.00251629	0.0872716	sialic acid binding Ig-like lectin 14
ENSG00000162706	CADM3	9.88858	-1.62055	0.53677	0.0025354	0.0875399	cell adhesion molecule 3
ENSG00000175416	CLTB	430.944	0.395215	0.130932	0.00254049	0.0875399	clathrin, light chain B
ENSG00000248919	ATP5J2-PTCD1	11.0621	-1.27393	0.42198	0.00253658	0.0875399	ATP5J2-PTCD1 readthrough
ENSG00000139263	LRIG3	144.601	-0.55365	0.1837	0.00257929	0.0886854	leucine-rich repeats and immunoglobulin-like domains 3
ENSG00000100441	KHNYN	474.089	-0.451728	0.149974	0.00259487	0.0890291	KH and NYN domain containing
ENSG00000159450	TCHH	9.73107	-1.36089	0.452253	0.00262	0.0895064	trichohyalin
ENSG00000179862	CITED4	316.133	0.592499	0.196862	0.00261487	0.0895064	Cbp/p300-interacting transactivator, with Glu/Asp-rich carboxy-terminal domain, 4
ENSG00000188211	NCR3LG1	8.28698	-1.54182	0.512588	0.0026305	0.0896732	natural killer cell cytotoxicity receptor 3 ligand 1
ENSG00000087085	ACHE	18.787	1.43331	0.477645	0.00269291	0.0902989	acetylcholinesterase (Yt blood group)
ENSG00000088888	MAVS	329.966	-0.845023	0.28151	0.00268434	0.0902989	mitochondrial antiviral signaling protein
ENSG00000109072	VTN	64656.1	0.34691	0.116016	0.00278802	0.0902989	vitronectin
ENSG00000114450	GNB4	46.6391	-1.09398	0.36474	0.00270559	0.0902989	guanine nucleotide binding protein (G protein), beta polypeptide 4
ENSG00000115255	REEP6	4452.78	0.456775	0.152489	0.00274026	0.0902989	receptor accessory protein 6
ENSG00000118257	NRP2	140.79	-0.99094	0.33103	0.00275794	0.0902989	neuropilin 2
ENSG00000118762	PKD2	250.302	-0.520569	0.173713	0.00272902	0.0902989	polycystic kidney disease 2 (autosomal dominant)
ENSG00000135336	ORC3	102.284	-0.613395	0.204306	0.00267914	0.0902989	origin recognition complex, subunit 3
ENSG00000137872	SEMA6D	73.6482	-0.770326	0.257639	0.00279036	0.0902989	sema domain, transmembrane domain (TM), and cytoplasmic domain, (semaphorin) 6D
ENSG00000143248	RGS5	418.596	-0.581604	0.19431	0.00276089	0.0902989	regulator of G-protein signaling 5
ENSG00000162441	LZIC	109.786	-0.719657	0.240004	0.0027129	0.0902989	leucine zipper and CTNNBIP1 domain containing
ENSG00000164327	RICTOR	301.108	-0.482862	0.161494	0.00279001	0.0902989	RPTOR independent companion of MTOR, complex 2
ENSG00000166002	SMCO4	214.237	0.516027	0.172316	0.00274755	0.0902989	single-pass membrane protein with coiled-coil domains 4
ENSG00000174145	KIAA1239	6.78936	-1.73788	0.578617	0.00266888	0.0902989	KIAA1239
ENSG00000185246	PRPF39	153.703	-0.570942	0.190682	0.00275158	0.0902989	pre-mRNA processing factor 39
ENSG00000186185	KIF18B	5.43753	-1.8996	0.634629	0.00276029	0.0902989	kinesin family member 18B
ENSG00000186787	SPIN2B	26.9176	0.889483	0.297437	0.00278529	0.0902989	spindlin family, member 2B
ENSG00000188486	H2AFX	88.2907	0.561656	0.187094	0.0026822	0.0902989	H2A histone family, member X
ENSG00000196189	SEMA4A	23.7181	1.03566	0.345167	0.00269571	0.0902989	sema domain, immunoglobulin domain (Ig), transmembrane domain (TM) and short cytoplasmic domain, (semaphorin) 4A
ENSG00000197128	ZNF772	40.9124	-0.946037	0.316328	0.00278351	0.0902989	zinc finger protein 772
ENSG00000213066	FGFR1OP	374.494	-0.369146	0.123175	0.00272727	0.0902989	FGFR1 oncogene partner
ENSG00000223474	AL020996.1	31.3896	-1.12379	0.375435	0.00275975	0.0902989	Uncharacterized protein
ENSG00000255103	KIAA0754	45.1178	-1.33228	0.445501	0.00278499	0.0902989	KIAA0754
ENSG00000070413	DGCR2	606.762	0.333153	0.111504	0.00280988	0.0903807	DiGeorge syndrome critical region gene 2
ENSG00000135045	C9orf40	28.8814	0.749172	0.250726	0.00280794	0.0903807	chromosome 9 open reading frame 40
ENSG00000188833	ENTPD8	208.83	0.504265	0.168742	0.00280456	0.0903807	ectonucleoside triphosphate diphosphohydrolase 8
ENSG00000073969	NSF	137.99	-0.63969	0.214417	0.00285077	0.0905999	N-ethylmaleimide-sensitive factor
ENSG00000077809	GTF2I	1662.56	-0.241962	0.0810924	0.00284716	0.0905999	general transcription factor IIi
ENSG00000130244	FAM98C	161.249	0.483483	0.162047	0.00284888	0.0905999	family with sequence similarity 98, member C
ENSG00000131732	ZCCHC9	269.056	-0.403928	0.135266	0.00282494	0.0905999	zinc finger, CCHC domain containing 9
ENSG00000170099	SERPINA6	3878.23	0.354135	0.118626	0.00283302	0.0905999	serpin peptidase inhibitor, clade A (alpha-1 antiproteinase, antitrypsin), member 6
ENSG00000245680	ZNF585B	69.7675	-0.759209	0.254478	0.00285062	0.0905999	zinc finger protein 585B
ENSG00000117586	TNFSF4	13.9394	-1.32808	0.445577	0.00287693	0.0910685	tumor necrosis factor (ligand) superfamily, member 4
ENSG00000100348	TXN2	791.343	0.308599	0.10361	0.00289702	0.0912599	thioredoxin 2
ENSG00000136011	STAB2	618.072	-1.00633	0.337808	0.0028919	0.0912599	stabilin 2
ENSG00000144229	THSD7B	7.54723	-1.63019	0.547605	0.00291145	0.0912599	thrombospondin, type I, domain containing 7B
ENSG00000173868	PHOSPHO1	16.7907	-1.48217	0.497986	0.0029173	0.0912599	phosphatase, orphan 1
ENSG00000205143	ARID3C	37.8356	-1.20282	0.404022	0.00290966	0.0912599	AT rich interactive domain 3C (BRIGHT-like)
ENSG00000214530	STARD10	4887.64	0.39443	0.132507	0.00291398	0.0912599	StAR-related lipid transfer (START) domain containing 10
ENSG00000099834	CDHR5	3506.85	0.471777	0.158659	0.00294404	0.0913798	cadherin-related family member 5
ENSG00000100034	PPM1F	245.647	-0.51085	0.171794	0.00294308	0.0913798	protein phosphatase, Mg2+/Mn2+ dependent, 1F
ENSG00000118473	SGIP1	8.85372	-1.61421	0.542621	0.00293136	0.0913798	SH3-domain GRB2-like (endophilin) interacting protein 1
ENSG00000135439	AGAP2	25.6574	-1.06548	0.358289	0.00294127	0.0913798	ArfGAP with GTPase domain, ankyrin repeat and PH domain 2
ENSG00000146463	ZMYM4	267.812	-0.52905	0.177969	0.0029518	0.0914426	zinc finger, MYM-type 4
ENSG00000078808	SDF4	1798.09	0.287071	0.0966483	0.00297546	0.0918191	stromal cell derived factor 4
ENSG00000159289	GOLGA6A	79.7031	-1.21576	0.409243	0.00297072	0.0918191	golgin A6 family, member A
ENSG00000080200	CRYBG3	64.085	-1.07316	0.361759	0.00301197	0.0918524	beta-gamma crystallin domain containing 3
ENSG00000080839	RBL1	27.5226	-0.903463	0.304742	0.00302997	0.0918524	retinoblastoma-like 1 (p107)
ENSG00000104381	GDAP1	24.5186	-1.13256	0.382166	0.0030412	0.0918524	ganglioside induced differentiation associated protein 1
ENSG00000108578	BLMH	77.532	-0.802233	0.270574	0.00302755	0.0918524	bleomycin hydrolase
ENSG00000138380	CARF	63.0146	-0.737018	0.248496	0.00301784	0.0918524	calcium responsive transcription factor
ENSG00000175356	SCUBE2	9.04278	-1.57469	0.530544	0.00299685	0.0918524	signal peptide, CUB domain, EGF-like 2
ENSG00000175467	SART1	402.574	0.374082	0.126237	0.00304336	0.0918524	squamous cell carcinoma antigen recognized by T cells
ENSG00000196408	NOXO1	14.7245	1.09827	0.370356	0.0030226	0.0918524	NADPH oxidase organizer 1
ENSG00000214595	EML6	30.1634	-1.05874	0.357142	0.00303188	0.0918524	echinoderm microtubule associated protein like 6
ENSG00000215421	ZNF407	89.22	-0.649199	0.218687	0.00299139	0.0918524	zinc finger protein 407
ENSG00000228594	C1orf233	8.02852	-1.33284	0.449813	0.00304563	0.0918524	chromosome 1 open reading frame 233
ENSG00000081237	PTPRC	242.092	-0.849266	0.286907	0.00307571	0.0922365	protein tyrosine phosphatase, receptor type, C
ENSG00000170653	ATF7	242.809	-0.624293	0.210826	0.00306472	0.0922365	activating transcription factor 7
ENSG00000198844	ARHGEF15	77.4914	-0.786424	0.265666	0.00307437	0.0922365	Rho guanine nucleotide exchange factor (GEF) 15
ENSG00000155906	RMND1	195.894	-0.55977	0.189207	0.0030913	0.0925302	required for meiotic nuclear division 1 homolog (S. cerevisiae)
ENSG00000135945	REV1	220.128	-0.529529	0.179038	0.0031001	0.0926197	REV1, polymerase (DNA directed)
ENSG00000106565	TMEM176B	10143.6	0.405712	0.137444	0.00315888	0.0935137	transmembrane protein 176B
ENSG00000171295	ZNF440	50.5826	-0.846059	0.286558	0.00315222	0.0935137	zinc finger protein 440
ENSG00000198218	QRICH1	316.606	-0.359603	0.121825	0.00315933	0.0935137	glutamine-rich 1
ENSG00000204152	TIMM23B	79.1735	-1.31961	0.446778	0.00314081	0.0935137	translocase of inner mitochondrial membrane 23 homolog B (yeast)
ENSG00000164300	SERINC5	250.736	-0.810448	0.274645	0.0031686	0.0935375	serine incorporator 5
ENSG00000256683	ZNF350	49.2555	-0.917834	0.31107	0.00317186	0.0935375	zinc finger protein 350
ENSG00000101773	RBBP8	57.5446	-0.766528	0.259962	0.00319198	0.0937021	retinoblastoma binding protein 8
ENSG00000106462	EZH2	26.8804	-0.840691	0.285217	0.00320301	0.0937021	enhancer of zeste homolog 2 (Drosophila)
ENSG00000143702	CEP170	131.838	-0.548105	0.185946	0.00320193	0.0937021	centrosomal protein 170kDa
ENSG00000153993	SEMA3D	14.1657	-1.40518	0.476514	0.00318928	0.0937021	sema domain, immunoglobulin domain (Ig), short basic domain, secreted, (semaphorin) 3D
ENSG00000184007	PTP4A2	909.983	0.20234	0.0686686	0.00321268	0.0937021	protein tyrosine phosphatase type IVA, member 2
ENSG00000187522	HSPA14	67.1612	-0.596113	0.202281	0.00320916	0.0937021	heat shock 70kDa protein 14
ENSG00000075407	ZNF37A	178.963	-0.497327	0.168946	0.00324303	0.0940915	zinc finger protein 37A
ENSG00000105223	PLD3	1457.56	0.34344	0.116647	0.00323727	0.0940915	phospholipase D family, member 3
ENSG00000121892	PDS5A	752.508	-0.268922	0.0913569	0.00324372	0.0940915	PDS5, regulator of cohesion maintenance, homolog A (S. cerevisiae)
ENSG00000244405	ETV5	86.7952	-0.785344	0.26687	0.00325266	0.0941794	ets variant 5
ENSG00000037280	FLT4	249.158	-1.02951	0.349976	0.00326473	0.0942908	fms-related tyrosine kinase 4
ENSG00000174405	LIG4	218.779	-0.692142	0.235318	0.00326832	0.0942908	ligase IV, DNA, ATP-dependent
ENSG00000067082	KLF6	1488.79	0.76038	0.259273	0.00335987	0.094363	Kruppel-like factor 6
ENSG00000115963	RND3	412.538	0.643622	0.219455	0.00335902	0.094363	Rho family GTPase 3
ENSG00000119640	ACYP1	17.2778	-1.04261	0.355571	0.00336546	0.094363	acylphosphatase 1, erythrocyte (common) type
ENSG00000129675	ARHGEF6	99.9479	-0.878788	0.299589	0.00335363	0.094363	Rac/Cdc42 guanine nucleotide exchange factor (GEF) 6
ENSG00000130513	GDF15	147.486	1.19173	0.405569	0.00329903	0.094363	growth differentiation factor 15
ENSG00000147454	SLC25A37	607.105	-0.487431	0.16599	0.00331933	0.094363	solute carrier family 25 (mitochondrial iron transporter), member 37
ENSG00000151694	ADAM17	85.3193	-0.864414	0.294563	0.00334012	0.094363	ADAM metallopeptidase domain 17
ENSG00000158480	SPATA2	56.5062	0.645344	0.219959	0.003347	0.094363	spermatogenesis associated 2
ENSG00000160783	PMF1	401.644	0.372309	0.126687	0.00329484	0.094363	polyamine-modulated factor 1
ENSG00000172354	GNB2	958.128	0.374348	0.127633	0.00335704	0.094363	guanine nucleotide binding protein (G protein), beta polypeptide 2
ENSG00000174231	PRPF8	1116.08	-0.348525	0.118764	0.00333983	0.094363	pre-mRNA processing factor 8
ENSG00000175216	CKAP5	352.917	-0.405893	0.138069	0.00328446	0.094363	cytoskeleton associated protein 5
ENSG00000253276	CCDC71L	171.443	0.644746	0.219537	0.00331576	0.094363	coiled-coil domain containing 71-like
ENSG00000253731	PCDHGA6	24.2218	-1.6142	0.550288	0.00335292	0.094363	protocadherin gamma subfamily A, 6
ENSG00000081052	COL4A4	40.9481	-1.06566	0.364168	0.00343028	0.0944782	collagen, type IV, alpha 4
ENSG00000085662	AKR1B1	109.944	-0.842987	0.288067	0.00342956	0.0944782	aldo-keto reductase family 1, member B1 (aldose reductase)
ENSG00000101938	CHRDL1	12.6597	-1.82843	0.624573	0.00341707	0.0944782	chordin-like 1
ENSG00000111913	FAM65B	52.4335	-0.953191	0.325807	0.00343761	0.0944782	family with sequence similarity 65, member B
ENSG00000118007	STAG1	182.79	-0.854406	0.291696	0.00339948	0.0944782	stromal antigen 1
ENSG00000159461	AMFR	1526.33	0.318526	0.108722	0.00339271	0.0944782	autocrine motility factor receptor, E3 ubiquitin protein ligase
ENSG00000162998	FRZB	36.4162	-1.17773	0.40199	0.00339234	0.0944782	frizzled-related protein
ENSG00000163006	CCDC138	17.3105	-1.03898	0.355066	0.00343164	0.0944782	coiled-coil domain containing 138
ENSG00000183186	C2CD4C	9.52403	-1.48089	0.505495	0.00339417	0.0944782	C2 calcium-dependent domain containing 4C
ENSG00000187699	C2orf88	72.4654	-0.855482	0.292437	0.00344063	0.0944782	chromosome 2 open reading frame 88
ENSG00000188474	ZNF788	7.63825	-1.59388	0.544104	0.00339652	0.0944782	Zinc finger protein 788
ENSG00000196366	C9orf163	8.46883	-1.19017	0.406491	0.00341233	0.0944782	chromosome 9 open reading frame 163
ENSG00000143995	MEIS1	65.9341	-0.825697	0.282319	0.00344788	0.0945144	Meis homeobox 1
ENSG00000116830	TTF2	38.2925	-0.866876	0.296627	0.00347292	0.0946012	transcription termination factor, RNA polymerase II
ENSG00000170954	ZNF415	14.7265	-1.31513	0.450152	0.00348319	0.0946012	zinc finger protein 415
ENSG00000173812	EIF1	2608.94	0.309889	0.106082	0.00348662	0.0946012	eukaryotic translation initiation factor 1
ENSG00000196743	GM2A	290.994	0.397355	0.136013	0.00348411	0.0946012	GM2 ganglioside activator
ENSG00000251192	ZNF674	40.3832	-1.08272	0.370615	0.00348446	0.0946012	zinc finger protein 674
ENSG00000073734	ABCB11	451.534	-0.799211	0.273731	0.00350371	0.0947744	ATP-binding cassette, sub-family B (MDR/TAP), member 11
ENSG00000122497	NBPF14	194.705	-0.807959	0.276887	0.0035227	0.0947744	neuroblastoma breakpoint family, member 14
ENSG00000135924	DNAJB2	695.887	0.335901	0.115063	0.0035083	0.0947744	DnaJ (Hsp40) homolog, subfamily B, member 2
ENSG00000170144	HNRNPA3	1359.03	-0.216729	0.0742725	0.00352255	0.0947744	heterogeneous nuclear ribonucleoprotein A3
ENSG00000197779	ZNF81	25.1332	-1.14589	0.393159	0.0035619	0.0956675	zinc finger protein 81
ENSG00000081320	STK17B	66.3765	-0.947234	0.325581	0.00362158	0.0967817	serine/threonine kinase 17b
ENSG00000116133	DHCR24	8766.7	0.33799	0.116153	0.0036158	0.0967817	24-dehydrocholesterol reductase
ENSG00000141404	GNAL	37.3539	-0.986106	0.339471	0.00367448	0.0977088	guanine nucleotide binding protein (G protein), alpha activating activity polypeptide, olfactory type
ENSG00000185825	BCAP31	968.47	0.354465	0.122027	0.00367465	0.0977088	B-cell receptor-associated protein 31
ENSG00000173218	VANGL1	70.8031	-0.798443	0.275108	0.00370447	0.0980118	VANGL planar cell polarity protein 1
ENSG00000174851	YIF1A	922.394	0.387132	0.133371	0.00369991	0.0980118	Yip1 interacting factor homolog A (S. cerevisiae)
ENSG00000179632	MAF1	493.59	0.306118	0.105445	0.00369491	0.0980118	MAF1 homolog (S. cerevisiae)
ENSG00000099219	ERMP1	109.163	-0.640128	0.220652	0.00371878	0.0981066	endoplasmic reticulum metallopeptidase 1
ENSG00000101405	OXT	82.7787	1.14826	0.395965	0.00373265	0.0981066	oxytocin/neurophysin I prepropeptide
ENSG00000117984	CTSD	7373.55	0.405327	0.13977	0.00373214	0.0981066	cathepsin D
ENSG00000181827	RFX7	114.209	-0.605933	0.208897	0.00372419	0.0981066	regulatory factor X, 7
ENSG00000142444	C19orf52	97.7412	-0.802589	0.276968	0.00375831	0.098613	chromosome 19 open reading frame 52
ENSG00000146858	ZC3HAV1L	6.62745	-1.49505	0.516022	0.00376428	0.098613	zinc finger CCCH-type, antiviral 1-like
ENSG00000104805	NUCB1	3132.04	0.279769	0.0966081	0.00378051	0.0987139	nucleobindin 1
ENSG00000171469	ZNF561	149.653	-0.447394	0.154486	0.0037793	0.0987139	zinc finger protein 561
ENSG00000021776	AQR	139.559	-0.666744	0.230739	0.00385738	0.0996576	aquarius intron-binding spliceosomal factor
ENSG00000100150	DEPDC5	198.795	-0.619657	0.214538	0.00387286	0.0996576	DEP domain containing 5
ENSG00000126746	ZNF384	193.024	-0.442044	0.153032	0.00386994	0.0996576	zinc finger protein 384
ENSG00000127603	MACF1	1491.83	-0.357329	0.123675	0.0038614	0.0996576	microtubule-actin crosslinking factor 1
ENSG00000160679	CHTOP	406.872	-0.275204	0.0951945	0.00384064	0.0996576	chromatin target of PRMT1
ENSG00000165323	FAT3	5.19253	-1.69304	0.58546	0.00383034	0.0996576	FAT atypical cadherin 3
ENSG00000170190	SLC16A5	30.5229	-1.13084	0.391431	0.00386487	0.0996576	solute carrier family 16 (monocarboxylate transporter), member 5
ENSG00000171914	TLN2	84.7195	0.613751	0.212347	0.00384856	0.0996576	talin 2
ENSG00000174197	MGA	178.448	-0.637629	0.220647	0.00385468	0.0996576	MGA, MAX dimerization protein
ENSG00000053702	NRIP2	36.6746	-1.24302	0.430754	0.0039056	0.0996978	nuclear receptor interacting protein 2
ENSG00000066735	KIF26A	70.271	-1.01603	0.352085	0.00390479	0.0996978	kinesin family member 26A
ENSG00000112246	SIM1	7.45289	-1.82746	0.633615	0.00392442	0.0996978	single-minded family bHLH transcription factor 1
ENSG00000146426	TIAM2	21.1002	-1.09325	0.37891	0.00391092	0.0996978	T-cell lymphoma invasion and metastasis 2
ENSG00000166913	YWHAB	953.025	0.279658	0.096941	0.00391622	0.0996978	tyrosine 3-monooxygenase/tryptophan 5-monooxygenase activation protein, beta
ENSG00000167468	GPX4	3093.74	0.405094	0.140446	0.00392236	0.0996978	glutathione peroxidase 4
ENSG00000185338	SOCS1	19.5271	1.30154	0.450946	0.00389876	0.0996978	suppressor of cytokine signaling 1
ENSG00000213132	AC022498.1	5.73477	1.3619	0.472381	0.00393826	0.0998904	Uncharacterized protein
ENSG00000123560	PLP1	17.6265	-1.80614	0.626715	0.00395272	0.0999392	proteolipid protein 1
ENSG00000155307	SAMSN1	33.1111	-0.975439	0.338412	0.00394658	0.0999392	SAM domain, SH3 domain and nuclear localization signals 1
